# Supplementary material for: Ultra-fast excited-state dynamics of substituted trans-naphthalene azo moieties
Source: Royal Society of Chemistry journal article supplement (doi:10.1039/d3cp01211e), 2023-01-01
Supplement: d3cp01211e1.pdf [file d3cp01211e1.pdf]

Supporting Information for

## Ultra-fast Excited-state Dynamics of substituted *trans*-Naphthalene Azo Moieties

Robert C. Hamburger,<sup>a</sup> Tao Huang,<sup>a</sup> Shea M. Martin,<sup>a</sup> Craig A. Pointer,<sup>a</sup> Lisa A. Fredin\*<sup>a</sup> and Elizabeth R. Young\*<sup>a</sup>

<sup>a</sup> Department of Chemistry, Lehigh University, 6 E. Packer Ave., Bethlehem, PA 18015, USA.

### Contents

|                                                                                                                                                                                                                                                                                                                             |    |
|-----------------------------------------------------------------------------------------------------------------------------------------------------------------------------------------------------------------------------------------------------------------------------------------------------------------------------|----|
| Materials and Synthetic Procedures.....                                                                                                                                                                                                                                                                                     | 5  |
| Synthesis.....                                                                                                                                                                                                                                                                                                              | 5  |
| 1. Nap-azo-ph (1) .....                                                                                                                                                                                                                                                                                                     | 5  |
| 2. Nap-azo-phOH (2) .....                                                                                                                                                                                                                                                                                                   | 6  |
| 3. Nap-azo-phOMe (3) .....                                                                                                                                                                                                                                                                                                  | 6  |
| 4. Nap-azo-phNMe <sub>2</sub> (4) .....                                                                                                                                                                                                                                                                                     | 7  |
| Photoisomerization and reversion of azo <b>1 - 4</b> : .....                                                                                                                                                                                                                                                                | 9  |
| Figure S1. a) Photoisomerization and reversion spectra of azo <b>1 - 4</b> . b) Partial photoisomerization of <b>1 - 4</b> occurs with the lamp of the UV-vis spectrometer. c) Kinetic traces of isomerization and reversion (with fitted lifetimes) d) Plot of reversion lifetime as a function of Hammett parameter. .... | 11 |
| Figure S2. Molar absorptivity of azo <b>1</b> in acetonitrile.....                                                                                                                                                                                                                                                          | 12 |
| Figure S3. Molar absorptivity of azo <b>2</b> in acetonitrile.....                                                                                                                                                                                                                                                          | 13 |
| Figure S4. Molar absorptivity of azo <b>3</b> in acetonitrile.....                                                                                                                                                                                                                                                          | 14 |
| Figure S5. Molar absorptivity of azo <b>4</b> in acetonitrile.....                                                                                                                                                                                                                                                          | 15 |
| Molecular orbital diagrams for azo <b>1 - 4</b> : .....                                                                                                                                                                                                                                                                     | 16 |
| Figure S6. Molecular orbital diagrams for azo <b>1</b> .....                                                                                                                                                                                                                                                                | 16 |
| Figure S7. Molecular orbital diagrams for azo <b>2</b> .....                                                                                                                                                                                                                                                                | 17 |
| Figure S8. Molecular orbital diagrams for azo <b>3</b> .....                                                                                                                                                                                                                                                                | 18 |
| Figure S9. Molecular orbital diagrams for azo <b>4</b> .....                                                                                                                                                                                                                                                                | 19 |
| Transient Absorption Fitting.....                                                                                                                                                                                                                                                                                           | 20 |
| Figure S10. Heat map of <b>1</b> TAS a) before b) after chirp correction.....                                                                                                                                                                                                                                               | 21 |

|                                                                                                                                                                                                                                                                                                                                                                                                                                                                    |    |
|--------------------------------------------------------------------------------------------------------------------------------------------------------------------------------------------------------------------------------------------------------------------------------------------------------------------------------------------------------------------------------------------------------------------------------------------------------------------|----|
| Figure S11. TAS heat map, global analysis fitting and analysis of fit for 1 collected at 370 nm excitation.<br>.....                                                                                                                                                                                                                                                                                                                                               | 22 |
| Figure S12. Heat map of 2 TAS a) before b) after chirp correction.....                                                                                                                                                                                                                                                                                                                                                                                             | 23 |
| Figure S13. TAS heat map, global analysis fitting and analysis of fit for 2 collected at 370 nm excitation.<br>.....                                                                                                                                                                                                                                                                                                                                               | 24 |
| Figure S14. Heat map of 3 TAS a) before b) after chirp correction.....                                                                                                                                                                                                                                                                                                                                                                                             | 25 |
| Figure S15. TAS heat map, global analysis fitting and analysis of fit for 3 collected at 370 nm excitation.<br>.....                                                                                                                                                                                                                                                                                                                                               | 26 |
| Figure S16. Heat map of 4 TAS a) before b) after chirp correction.....                                                                                                                                                                                                                                                                                                                                                                                             | 27 |
| Figure S17. TAS heat map, global analysis fitting and analysis of fit for 4 collected at 370 nm excitation.<br>.....                                                                                                                                                                                                                                                                                                                                               | 28 |
| Figure S18. Comparison of azobenzene with 1-4 on our TAS instrumentation. ....                                                                                                                                                                                                                                                                                                                                                                                     | 30 |
| Figure S19. Comparison of TAS residual spectrum with the difference of the steady-state absorption<br>spectra of the <i>trans</i> - and <i>cis</i> - isomer of 1-4.....                                                                                                                                                                                                                                                                                            | 31 |
| Triplet Potential Energy Curves of Azo <b>1</b> and <b>4</b> .....                                                                                                                                                                                                                                                                                                                                                                                                 | 32 |
| Figure S20. CSinglet and triplet PECs below 5 eV in energy along the torsional ( $\angle$ CNNC) and inversion<br>( $\angle$ <sup>Nap</sup> CNN) $S_0$ <i>trans</i> - <i>cis</i> isomerization. The excited state (TDDFT) surfaces above each shown point are<br>plotted and like excited states are connected with lines (black singlets and red triplets). B3LYP/6-<br>311G(d,p)/PCM(ACN). The relaxed triplet ( $T_1$ ) surfaces are shown in Figure S39-40..... | 32 |
| Figure S21. Spin orbit coupling between the first singlet and first two triplet excited states ( $\langle T_2-T_1  $<br>$\hat{S}_{SOC}   S_1 \rangle$ (top) and the lowest triplet and ground state ( $\langle S_0   \hat{S}_{SOC}   T_1 \rangle$ (bottom) along the torsional<br>( $\angle$ CNNC) and inversion ( $\angle$ <sup>Nap</sup> CNN) <i>trans</i> - <i>cis</i> isomerization. B3LYP/6-311G(d,p)/PCM(ACN). ....                                          | 33 |
| $S_0$ geometries and transition states of Azo <b>1</b> - <b>4</b> .....                                                                                                                                                                                                                                                                                                                                                                                            | 34 |
| Figure S22. $S_0$ geometries of azo 1 with various $\angle$ CNNC angles.....                                                                                                                                                                                                                                                                                                                                                                                       | 34 |
| Figure S23. $S_0$ geometries of azo 1 with various $\angle$ <sup>Ph</sup> CNN angles. ....                                                                                                                                                                                                                                                                                                                                                                         | 35 |
| Figure S24. Geometry of azo 1 transition state from point 8 in Figure S23. The imaginary vibrational<br>mode at $-409.97 \text{ cm}^{-1}$ is indicated by the blue arrow .....                                                                                                                                                                                                                                                                                     | 36 |
| Figure S25. $S_0$ geometries of azo 1 with various $\angle$ <sup>Nap</sup> CNN angles.....                                                                                                                                                                                                                                                                                                                                                                         | 37 |
| Figure S26. Geometry of azo 1 transition state from point 8 in Figure S25. The imaginary vibrational<br>mode at $-404.81 \text{ cm}^{-1}$ is indicated by the blue arrow .....                                                                                                                                                                                                                                                                                     | 38 |
| Figure S27. Geometry and relative energy of azo 2 transition states and the ground states at <i>trans</i> -<br>and <i>cis</i> - configurations.....                                                                                                                                                                                                                                                                                                                | 39 |
| Figure S28. Geometry of azo 2 transition state from point 2 in Figure S27. The imaginary vibrational<br>mode at $-398.49 \text{ cm}^{-1}$ is indicated by the blue arrow. ....                                                                                                                                                                                                                                                                                     | 40 |
| Figure S29. Geometry of azo 2 transition state from point 3 in Figure S27. The imaginary vibrational<br>mode at $-459.90 \text{ cm}^{-1}$ is indicated by the blue arrow. ....                                                                                                                                                                                                                                                                                     | 41 |

|                                                                                                                                                                           |    |
|---------------------------------------------------------------------------------------------------------------------------------------------------------------------------|----|
| Figure S30. Geometry and relative energy of azo 3 transition states and the ground states at <i>trans</i> - and <i>cis</i> - configurations.....                          | 42 |
| Figure S31. Geometry of azo 3 transition state from point 2 in Figure S30. The imaginary vibrational mode at $-397.45\text{ cm}^{-1}$ is indicated by the blue arrow..... | 43 |
| Figure S32. Geometry of azo 3 transition state from point 3 in Figure S30. The imaginary vibrational mode at $-422.82\text{ cm}^{-1}$ is indicated by the blue arrow..... | 44 |
| Figure S33. $S_0$ geometries of azo 4 with various $\angle\text{CNNC}$ angles.....                                                                                        | 45 |
| Figure S34. $S_0$ geometries of azo 4 with various $\angle^{\text{Ph}}\text{CNN}$ angles.....                                                                             | 46 |
| Figure S35. $S_0$ geometries of azo 4 with various $\angle^{\text{Nap}}\text{CNN}$ angles.....                                                                            | 47 |
| Figure S36. Geometry of azo 4 transition state from point 8 in Figure S35. The imaginary vibrational mode at $-384.14\text{ cm}^{-1}$ is indicated by the blue arrow..... | 48 |
| Figure S37. Comparing <i>trans</i> -, <i>cis</i> -, and transition states between azo 1 (top) and azo 4 (bottom). ....                                                    | 49 |
| Figure S38. Comparing optimized triplet geometries of azo 1-4 and their spin densities.....                                                                               | 49 |
| Figure S39. Triplet potential surface for azo 1 with various $\angle\text{CNNC}$ dihedral angles.....                                                                     | 50 |
| Figure S40. Triplet potential surface for azo 4 with various $\angle\text{CNNC}$ dihedral angles, and $\angle^{\text{Nap}}\text{CNN}$ angles.....                         | 51 |
| DFT Optimized Coordinates.....                                                                                                                                            | 52 |
| Trans - Nap-azo-ph (azo 1) coordinates (B3LYP/6-311G(d.p)/PCM(ACN)) .....                                                                                                 | 52 |
| Cis - Nap-azo-ph (azo 1) coordinates (B3LYP/6-311G(d.p)/PCM(ACN)).....                                                                                                    | 53 |
| TS - Nap-azo-ph (azo 1) coordinates (B3LYP/6-311G(d.p)/PCM(ACN)) .....                                                                                                    | 54 |
| Triplet - Nap-azo-ph (azo 1) coordinates (B3LYP/6-311G(d.p)/PCM(ACN)).....                                                                                                | 55 |
| Trans-Nap-azo-phOH (azo 2) coordinates .....                                                                                                                              | 56 |
| Cis-Nap-azo-phOH (azo 2) coordinates.....                                                                                                                                 | 57 |
| TS-Nap-azo-phOH (azo 2) coordinates .....                                                                                                                                 | 58 |
| Trans-Nap-azo-phOMe (azo 3) coordinates.....                                                                                                                              | 59 |
| Cis-Nap-azo-phOMe (azo 3) coordinates.....                                                                                                                                | 60 |
| TS-Nap-azo-phOMe (azo 3) coordinates.....                                                                                                                                 | 61 |
| Trans-Nap-azo-phNMe <sub>2</sub> (azo 4) coordinates .....                                                                                                                | 62 |
| Cis-Nap-azo-phNMe <sub>2</sub> (azo 4) coordinates.....                                                                                                                   | 63 |
| TS-Nap-azo-phNMe <sub>2</sub> (azo 4) coordinates .....                                                                                                                   | 64 |
| Triplet-Nap-azo-phNMe <sub>2</sub> (azo 4) coordinates.....                                                                                                               | 65 |
| TD-DFT tables (FC states) .....                                                                                                                                           | 66 |
| Table S1. 30 TDDFT singlet excitations of azo 1 from <i>trans</i> - $S_0$ geometry, B3LYP/6-311G(d.p)/PCM(ACN) .....                                                      | 66 |

|                                                                                                                                                                                                                                        |     |
|----------------------------------------------------------------------------------------------------------------------------------------------------------------------------------------------------------------------------------------|-----|
| Table S2. 30 TDDFT triplet excitations of azo 1 from <i>trans</i> -S <sub>0</sub> geometry, B3LYP/6-311G(d.p)/PCM(ACN)                                                                                                                 | 69  |
| Table S3. 30 TDDFT singlet excitations of azo 2 from <i>trans</i> -S <sub>0</sub> geometry, B3LYP/6-311G(d.p)/PCM(ACN)                                                                                                                 | 74  |
| Table S4. 30 TDDFT triplet excitations of azo 2 from <i>trans</i> -S <sub>0</sub> geometry, B3LYP/6-311G(d.p)/PCM(ACN)                                                                                                                 | 77  |
| Table S5. 30 TDDFT singlet excitations of azo 3 from <i>trans</i> -S <sub>0</sub> geometry, B3LYP/6-311G(d.p)/PCM(ACN)                                                                                                                 | 82  |
| Table S6. 30 TDDFT triplet excitations of azo 3 from <i>trans</i> -S <sub>0</sub> geometry, B3LYP/6-311G(d.p)/PCM(ACN)                                                                                                                 | 86  |
| Table S7. 30 TDDFT singlet excitations of azo 4 from <i>trans</i> -S <sub>0</sub> geometry, B3LYP/6-311G(d.p)/PCM(ACN)                                                                                                                 | 91  |
| Table S8. 30 TDDFT triplet excitations of azo 4 from <i>trans</i> -S <sub>0</sub> geometry, B3LYP/6-311G(d.p)/PCM(ACN)                                                                                                                 | 94  |
| Azo 1 and 4 PECs.....                                                                                                                                                                                                                  | 99  |
| Table S9. TDDFT Energies of 1 along the torsional $\angle$ CNNC of the S <sub>0</sub> <i>trans</i> -cis isomerization. ....                                                                                                            | 99  |
| Table S10. TDDFT Energies of 1 along the inversion $\angle$ <sup>Nap</sup> CNN of the S <sub>0</sub> <i>trans</i> -cis isomerization. ....                                                                                             | 99  |
| Table S11. TDDFT Energies of 4 along the torsional $\angle$ CNNC of the S <sub>0</sub> <i>trans</i> -cis isomerization. ....                                                                                                           | 100 |
| Table S12. TDDFT Energies of 4 along the inversion $\angle$ <sup>Nap</sup> CNN of the S <sub>0</sub> <i>trans</i> -cis isomerization. ....                                                                                             | 100 |
| Spin orbit coupling .....                                                                                                                                                                                                              | 101 |
| Table S13. Spin-orbit coupling constants between S <sub>0</sub> – S <sub>3</sub> and T <sub>1</sub> – T <sub>3</sub> states of azo 1 – 4 based on <i>trans</i> -S <sub>0</sub> geometry, B3LYP/6-311G(d.p)/PCM(ACN) .....              | 101 |
| Figure S41. Schematic demonstration of spin-orbit coupling constants between S <sub>0</sub> – S <sub>3</sub> and T <sub>1</sub> – T <sub>3</sub> states of azo 1 – 4 at the Franck-Condon geometry ( <i>trans</i> -ground state). .... | 101 |
| Table S14. Spin-orbit coupling constants between S <sub>0</sub> – S <sub>3</sub> and T <sub>1</sub> – T <sub>3</sub> states of azo 1 at various CNNC dihedral angles and <sup>Nap</sup> CNN angles B3LYP/6-311G(d.p)/PCM(ACN) .....    | 102 |
| Figure S42. Schematic demonstration of spin-orbit coupling constants between S <sub>0</sub> – S <sub>1</sub> and T <sub>1</sub> – T <sub>3</sub> states of azo 1 at various CNNC dihedral angles and <sup>Nap</sup> CNN angles. ....   | 103 |
| Table S15. Spin-orbit coupling constants between S <sub>0</sub> – S <sub>3</sub> and T <sub>1</sub> – T <sub>3</sub> states of azo 4 at various CNNC dihedral angles and <sup>Nap</sup> CNN angles B3LYP/6-311G(d.p)/PCM(ACN) .....    | 104 |
| Figure S43. Schematic demonstration of spin-orbit coupling constants between S <sub>0</sub> – S <sub>1</sub> and T <sub>1</sub> – T <sub>3</sub> states of azo 4 at various CNNC dihedral angles and <sup>Nap</sup> CNN angles. ....   | 105 |



## Experimental Details

### Materials and Synthetic Procedures

All reagents were obtained from commercial sources used as received without further purification, unless otherwise specified. Air-sensitive reactions were conducted using a standard Schlenk line techniques under nitrogen. Acetonitrile was dried over CaH<sub>2</sub> and distilled. Dried acetonitrile was stored over 4 Å sieves.

### Synthesis

#### 1. Nap-azo-ph (1)

The synthesis of azo **1** is modified from literatures.<sup>14,15</sup> In 50 mL Schlenk flask, 0.45 g (3.1 mmol) 2-naphthylamine, and 0.3 g (2.4 mmol) nitrobenzene are mixture with 0.25 g (6.25 mmol) NaOH. The solids are heated to 180 °C. This melt mixture is further stirred under N<sub>2</sub> for 30 min. After the reaction is complete, the mixture is cooled down to room temperature, dissolved in 30 mL Et<sub>2</sub>O and neutralized with 7.5 mL 2 M HCl solution. The organic layer is separated and dried under vacuum. The final product is obtained after chromatographic purification using a silica gel column with 1:20 ethyl acetate/pentane eluent.

Yield: 160 mg (28.7%)

<sup>1</sup>H-NMR (Acetone-D<sub>6</sub>): 8.57 (1H), 8.17 (1H), 8.11 (1H), 8.06-8.03 (4H), 7.66-7.57 (5H)

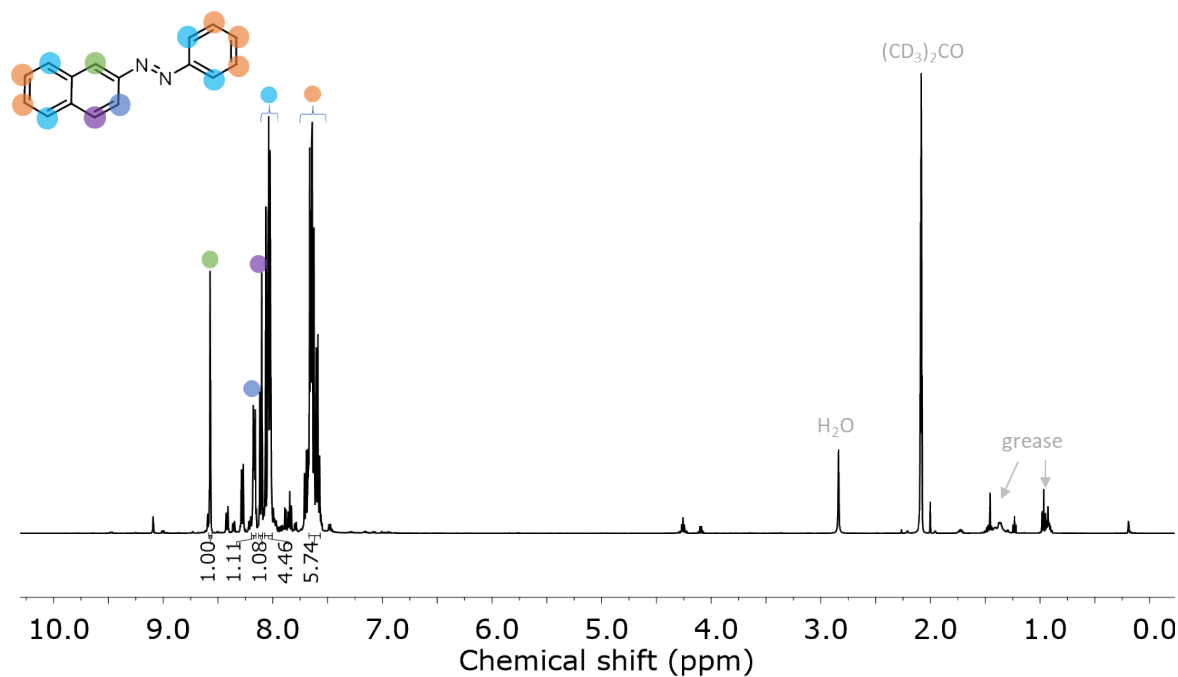

## 2. Nap-azo-phOH (2)

In 100 mL round bottom flask equipped with a stir-bar, 0.83 g (5.7 mmol) 2-naphthylamine is dissolved in 2.4 mL acetone. The solution is cooled to 0 °C in an ice bath and 2 mL 10 M HCl is added. To this solution, a pre-cooled aqueous solution (12 mL) of 0.41 g (6.0 mmol) NaNO<sub>2</sub> is added dropwise to convert the 2-naphthylamine into its corresponding diazonium salt. Following this, a pre-cooled 0.5 M NaOH solution (12 mL) of 1.18 g (8.5 mmol) K<sub>2</sub>CO<sub>3</sub> and 0.57 g (6.0 mmol) phenol is added. The reaction is further stirred for 1 hr. After warming up to room temperature, the reaction neutralized using 2 M HCl and resulted solution is filtered over a frit equipped with a celite pad. The collected solid on the frit is washed with 30 mL DI water and extracted with 60 mL Et<sub>2</sub>O. After evaporating the Et<sub>2</sub>O over vacuum, the raw product is obtained. The raw product is further purified through a silica gel column using 1:1 pentane/Et<sub>2</sub>O eluent.

Yield: 0.84 g (58.5%)

<sup>1</sup>H-NMR (DMSO-D<sub>6</sub>): 10.35 (1H), 8.45 (1H), 8.14 (1H), 8.05-7.96 (3H), 7.86 (2H), 7.61 (2H), 6.97 (2H)

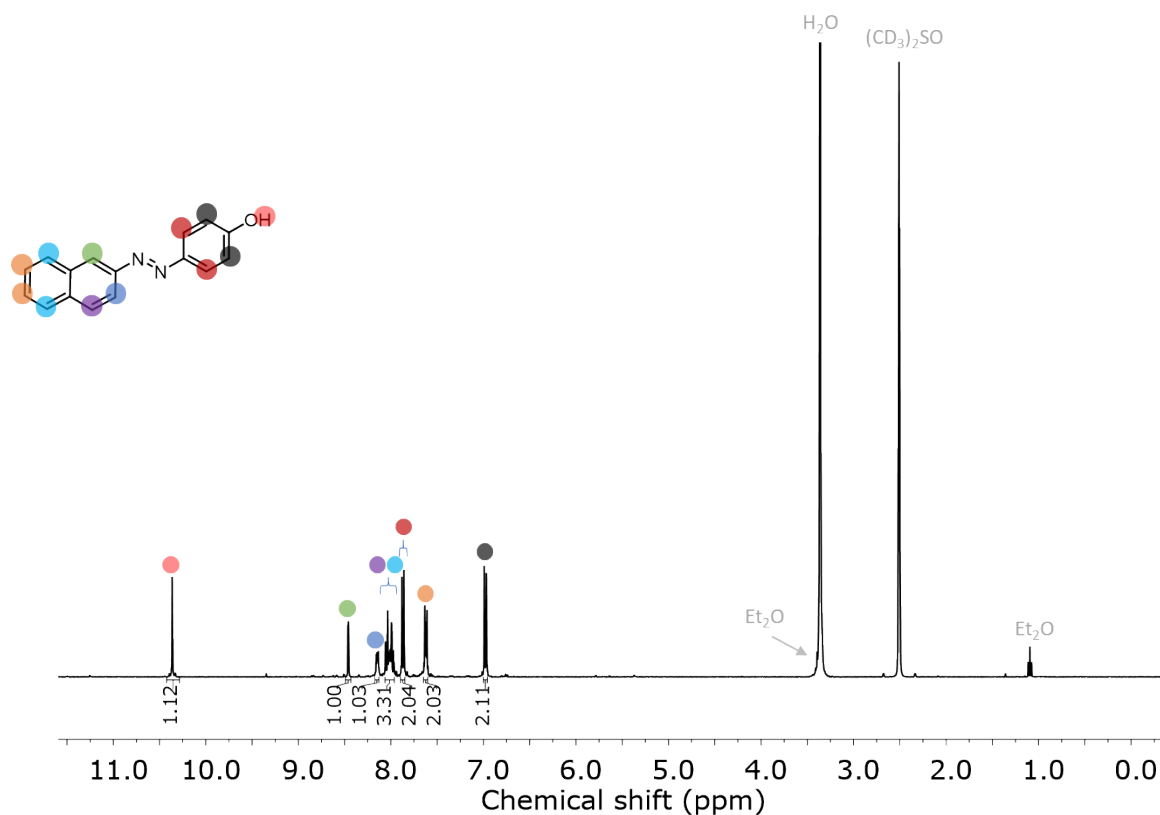

## 3. Nap-azo-phOMe (3)

In 50 mL Schlenk flask, 200 mg (0.8 mmol) nap-azo-phOH and 0.5 ml (8 mmol) MeI are dissolved in 5 ml anhydrous THF under the protection of N<sub>2</sub>. To this solution, a suspension of 200 mg NaH (60 % dispersion in mineral oil) in 15 mL THF is added. The reaction is heated to 65 °C and stirred for 16 hrs. After the reaction is complete, the solvent is removed under vacuum.

The final product is obtained after chromatographic purification using a silica gel column with 1:1 ethyl pentane/Et<sub>2</sub>O eluent.

Yield 190 mg (96%)

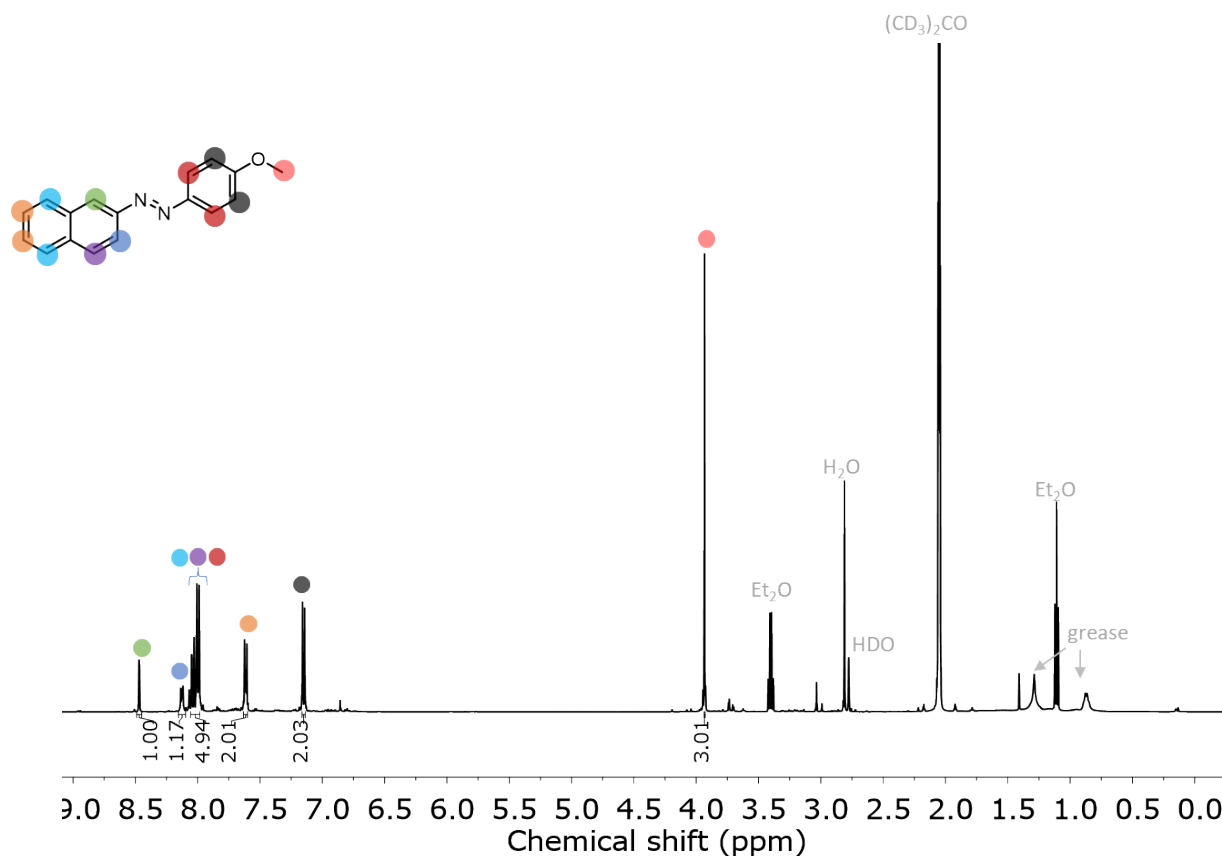

<sup>1</sup>H-NMR (Acetone-D<sub>6</sub>): 8.47 (1H), 8.14 (1H) 8.04 – 7.99 (5H), 7.62 (2H), 7.15 (2), 3.93 (3H)

#### 4. Nap-azo-phNMe<sub>2</sub> (4)

In 100 mL round bottom flask equipped with a stir-bar, 0.41 g (2.8 mmol) 2-naphthylamine is dissolved in 1.2 mL acetone. The solution is cooled to 0 °C in an ice bath and 1 mL 10 M HCl is added. To this solution, a pre-cooled aqueous solution (12 mL) of 0.41 g (6.0 mmol) NaNO<sub>2</sub> is added dropwise to convert the 2-naphthylamine into its corresponding diazonium salt. Following this, a pre-cooled aqueous solution (6 mL) of 0.16 mL (2.8 mmol) glacial acetic acid and 0.37 mL (2.9 mmol) dimethylaniline is added. The reaction is further stirred for 3 hrs. After warming up to room temperature, the reaction neutralized using 2 M NaOH and resulted solution is filtered over a frit equipped with a celite pad. The collected solid on the frit is washed with 30 mL DI water and extracted with 60 mL Et<sub>2</sub>O. After evaporating the Et<sub>2</sub>O over vacuum, the raw product is obtained. The raw product is further purified through a basic aluminum oxide silica gel column using 1:1 pentane/Et<sub>2</sub>O eluent.

Yield: 266 mg, (34%)

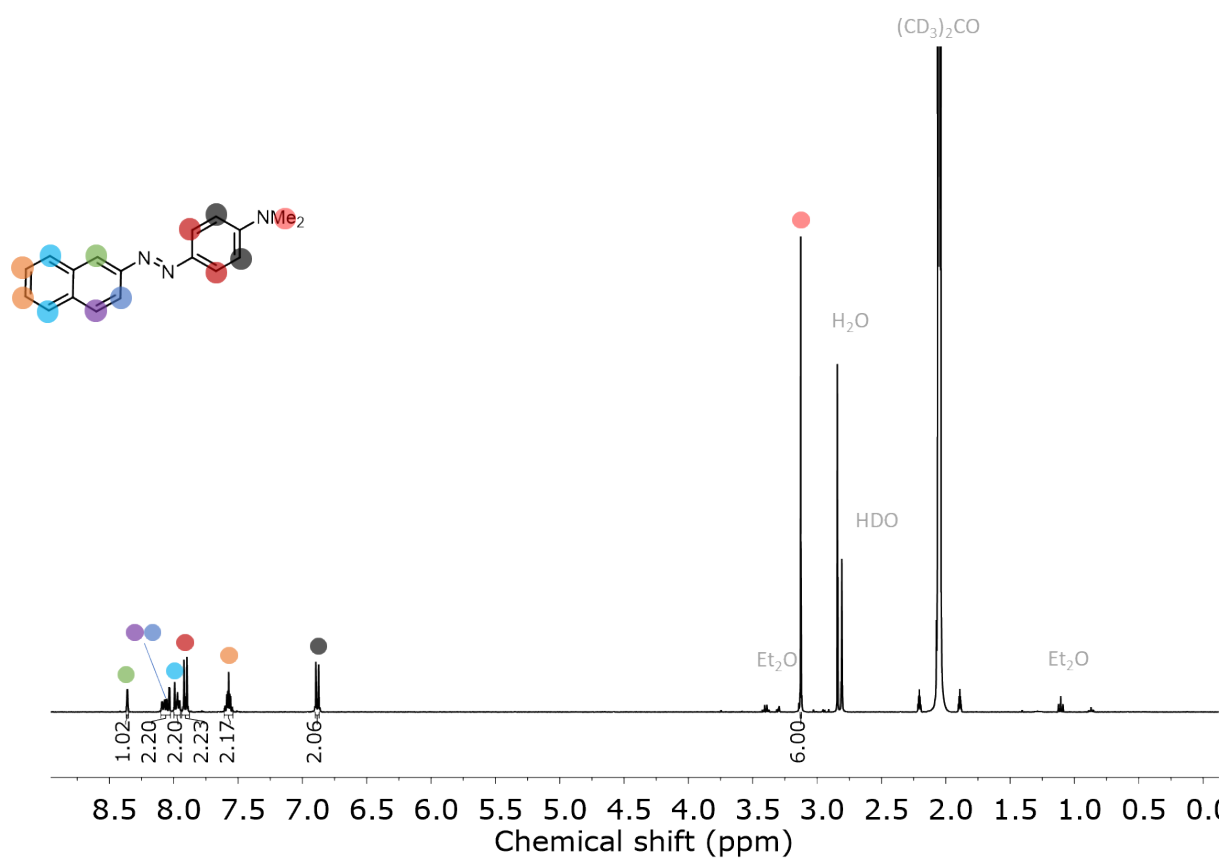

<sup>1</sup>H-NMR (DMSO-D<sub>6</sub>): 8.36 (1H), 8.09 – 8.03 (2H), 7.99 – 7.96 (2H), 7.91 (2H), 7.57 (2H), 6.88 (2H), 3.13 (2H)

Photoisomerization and reversion of azo **1** - **4**:

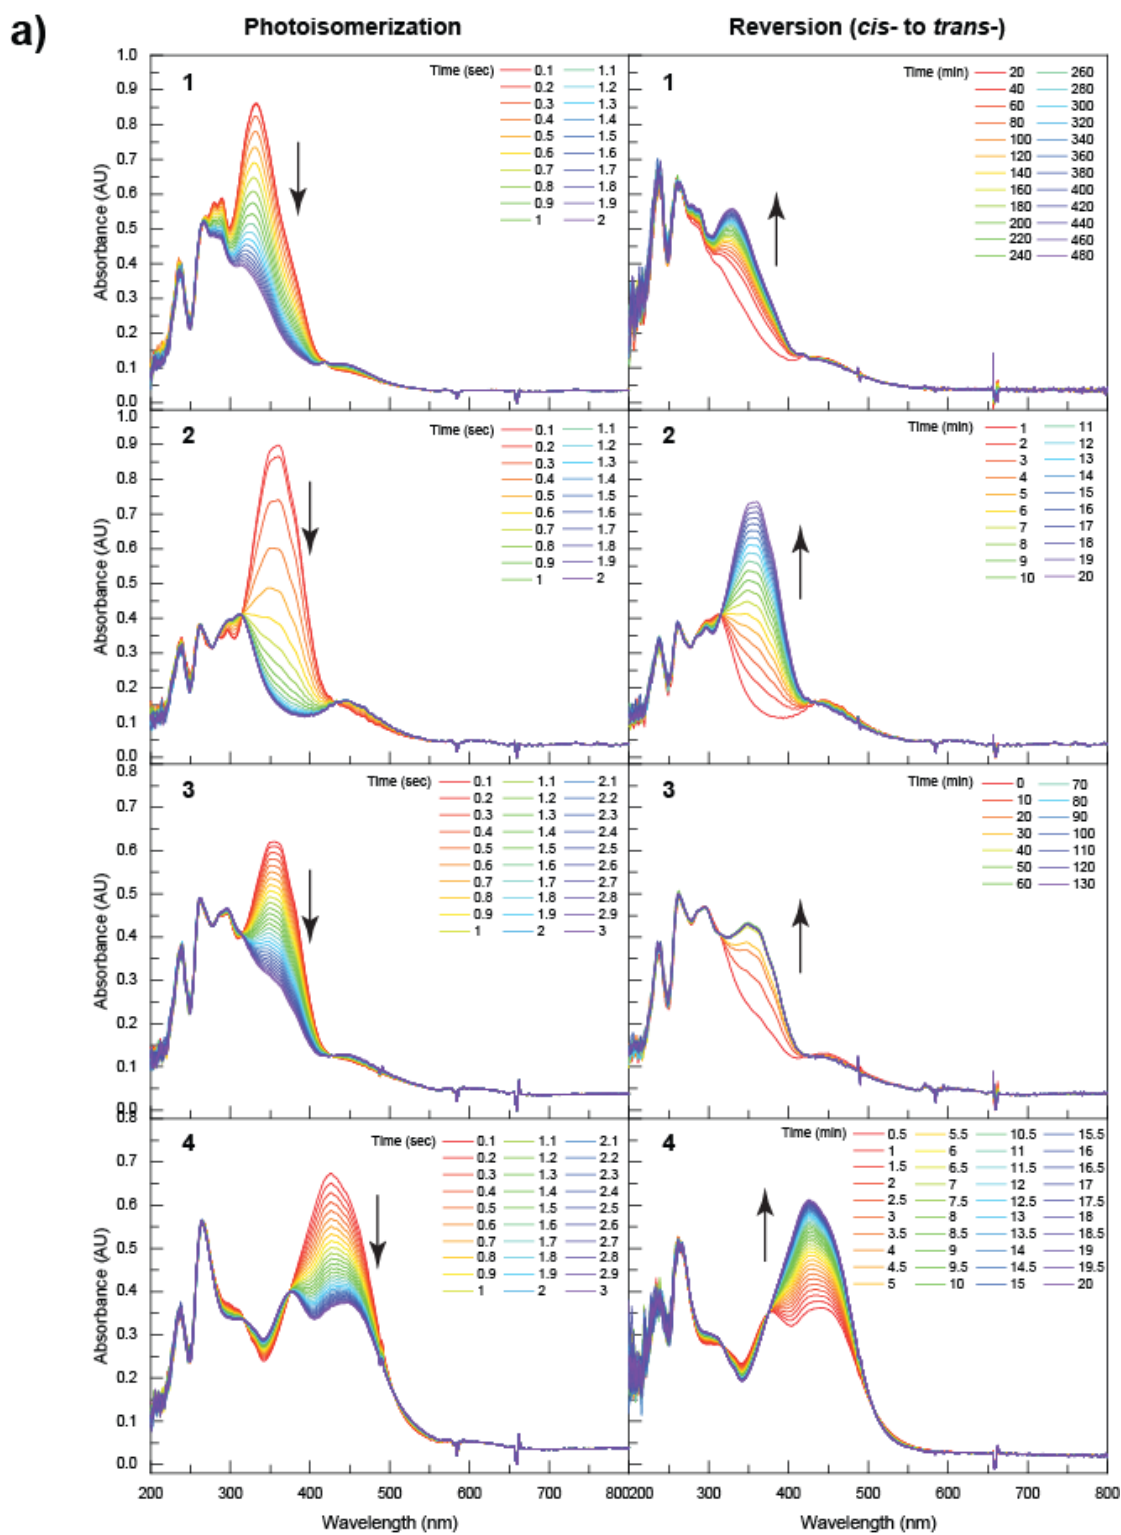

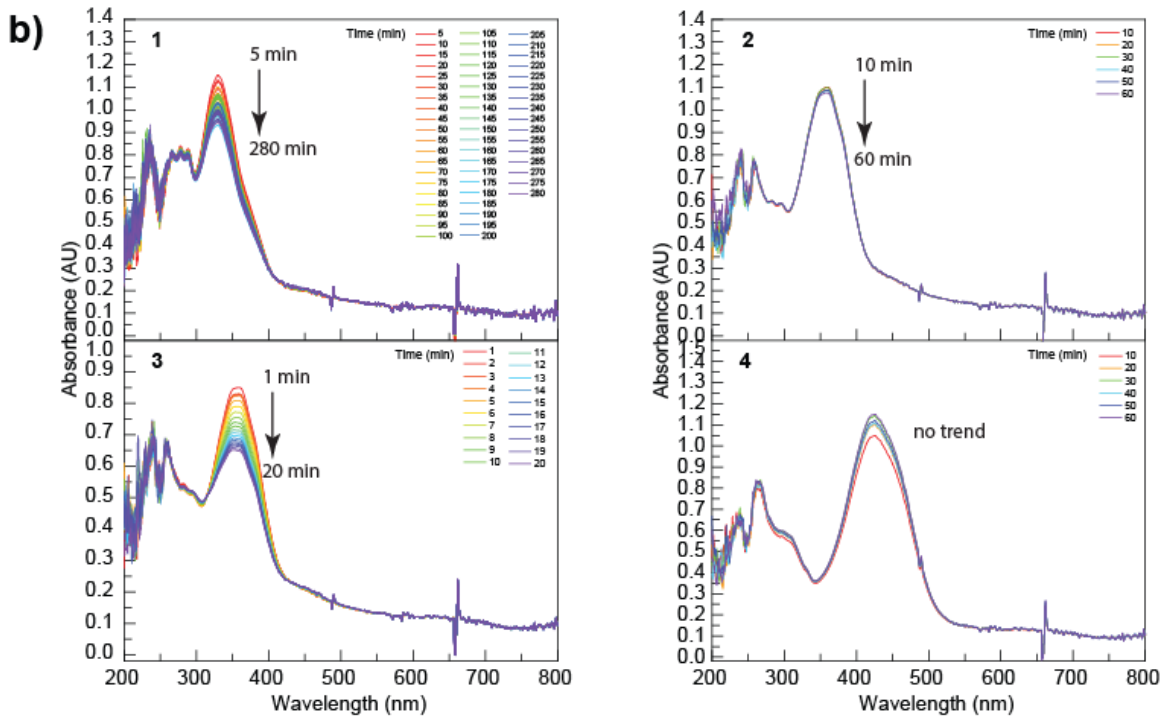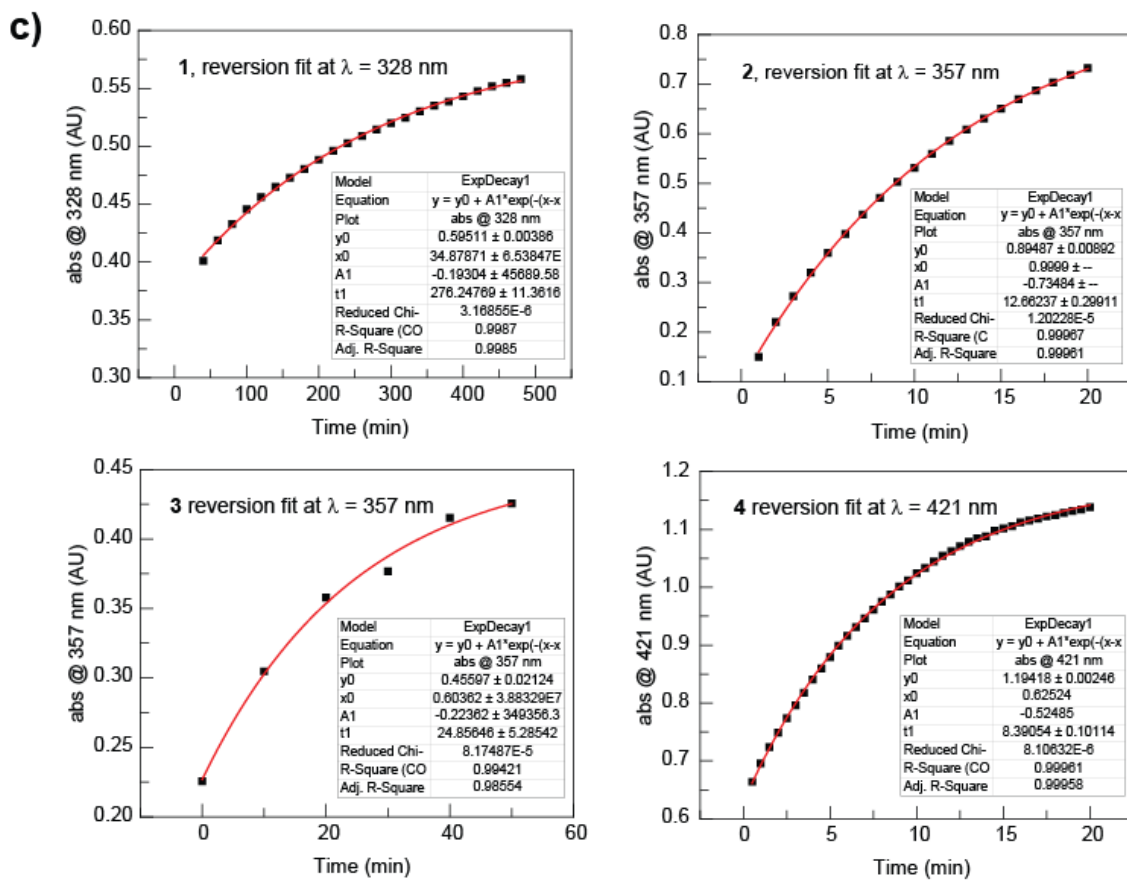

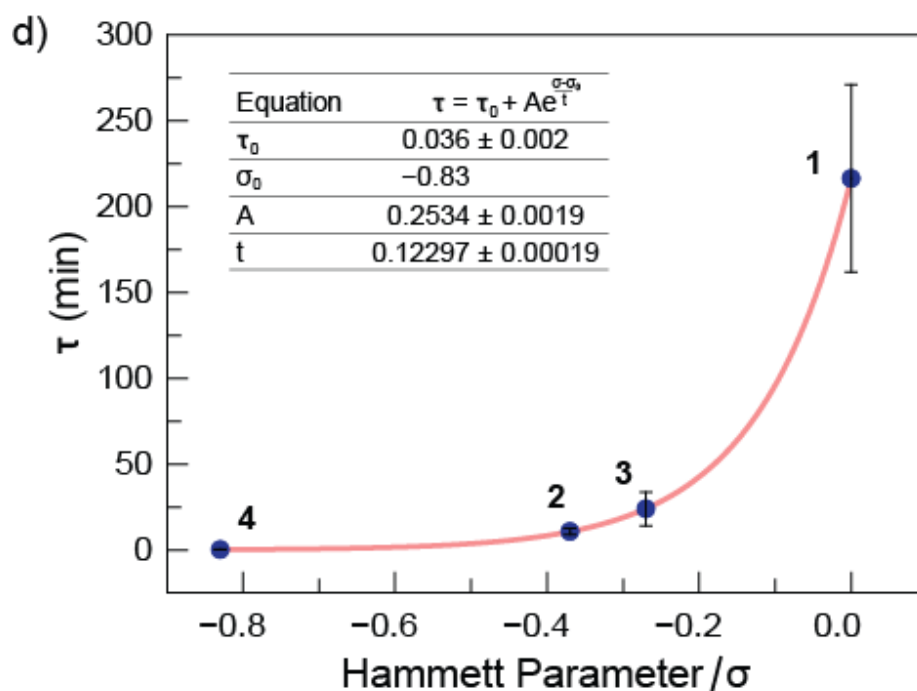

**Figure S1. a) Photoisomerization and reversion spectra of azo 1 – 4. b) Partial photoisomerization of 1 – 4 occurs with the lamp of the UV-vis spectrometer. c) Kinetic traces of isomerization and reversion (with fitted lifetimes) d) Plot of reversion lifetime as a function of Hammett parameter.**

The photoisomerization spectra in Figure S1a show that all four azo dyes photoisomerize from the *trans* to *cis* configuration upon several minutes of irradiation with a UV LED ( $\lambda_{\text{max}} = 370 \text{ nm}$ ) at 155 mW for 1 – 3 or a blue LED ( $\lambda_{\text{max}} = 453 \text{ nm}$ ) at 120 mW for 4. When illumination was stopped, the azo dyes reverted to the *trans* configuration over minutes (2 and 4) or hours (1 and 3). It appears that 1 and 3 do fully convert back to the *trans* configuration, however we determined that this results from the small amount of light originating from the spectrometer that maintains the *trans*  $\rightarrow$  *cis* photoisomerization process. Figure S1b shows a “photoisomerization” experiment starting from the *trans* configuration using only the spectrometer light. 1 and 3 show detectable isomerization, however 2 and 4 are essentially unchanged. These results are consistent with the incomplete reversion seen in Figure S1a. Plotting the reversion progress over time in Figure S1c and fitting these data reveals reversion lifetimes for the azo 1 – 4. Plotting the reversion lifetime as a function of Hammett parameter in Figure 1d shows that the dyes containing more electron donating substituents undergo faster *cis*  $\rightarrow$  *trans* isomerization.

Absorption spectra for azo **1** - **4**:

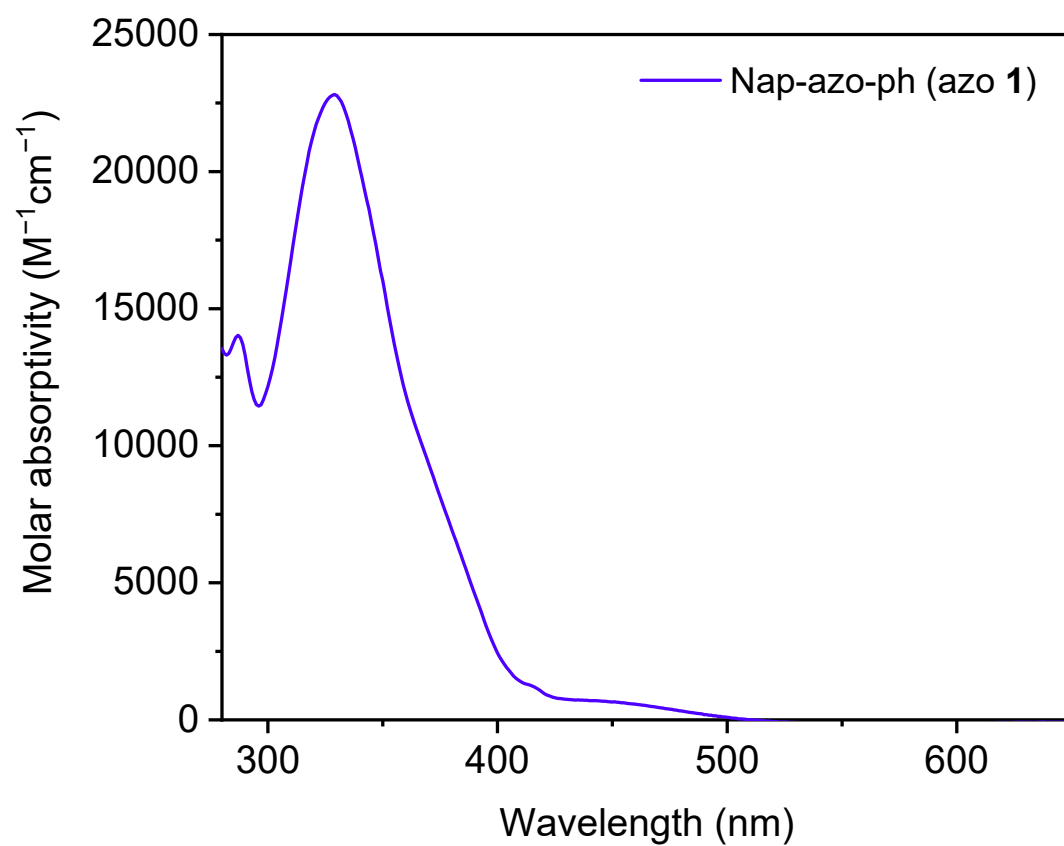

**Figure S2. Molar absorptivity of azo 1 in acetonitrile.**



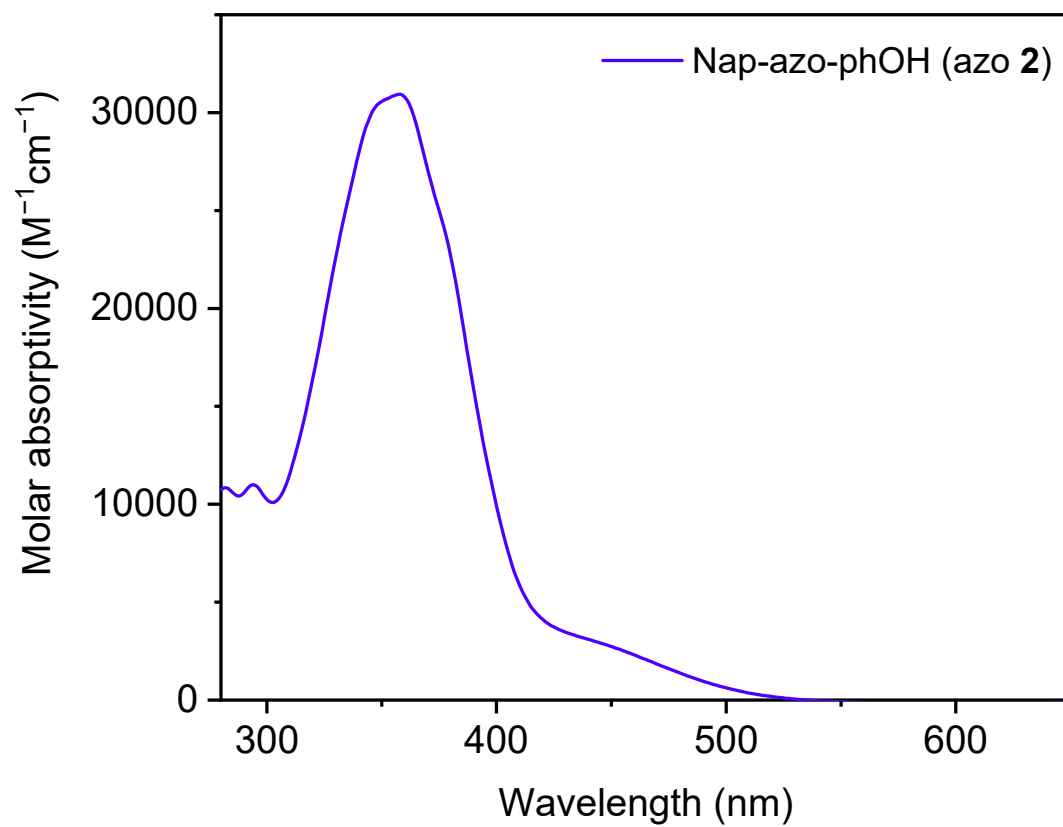

**Figure S3. Molar absorptivity of azo 2 in acetonitrile.**

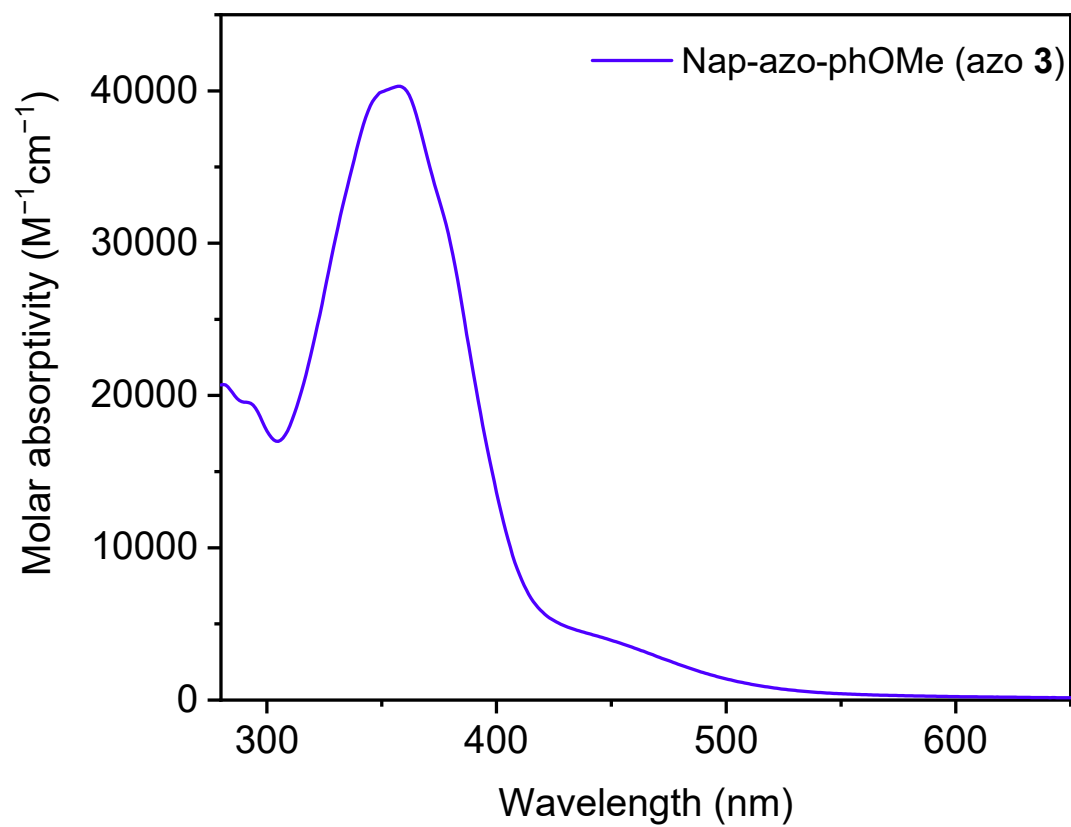

**Figure S4. Molar absorptivity of azo 3 in acetonitrile.**

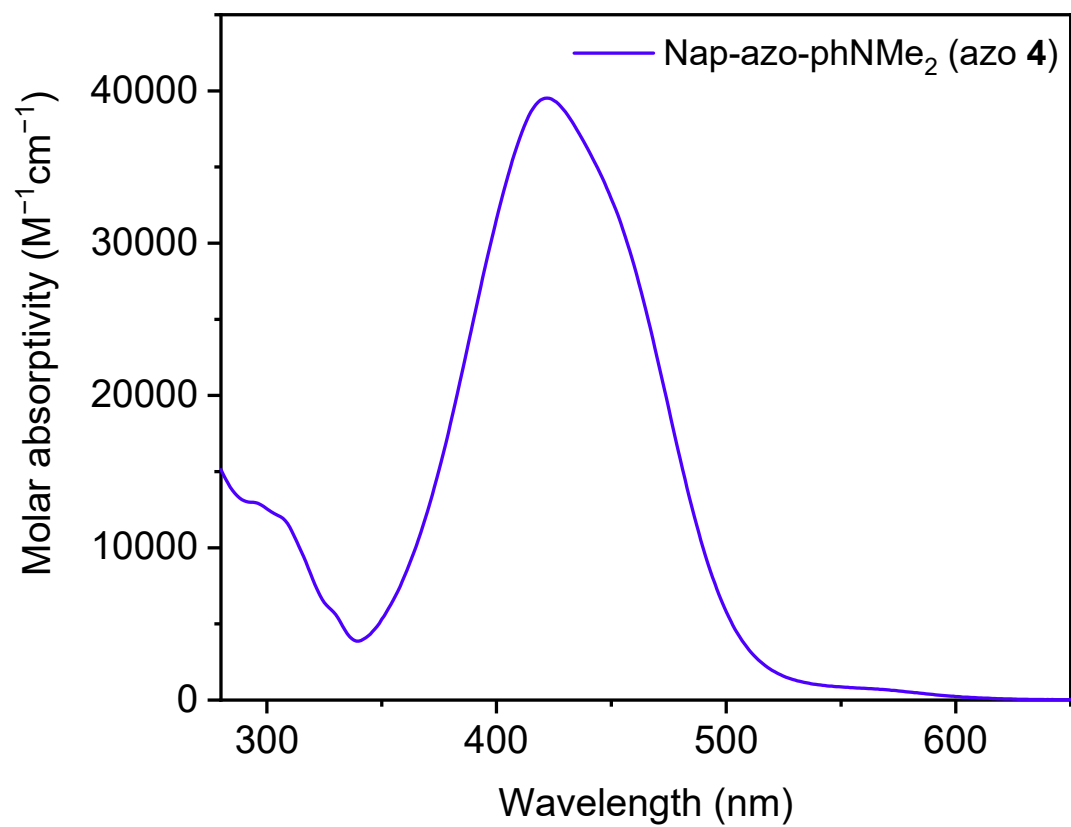

**Figure S5. Molar absorptivity of azo 4 in acetonitrile.**

Molecular orbital diagrams for azo **1** - **4**:

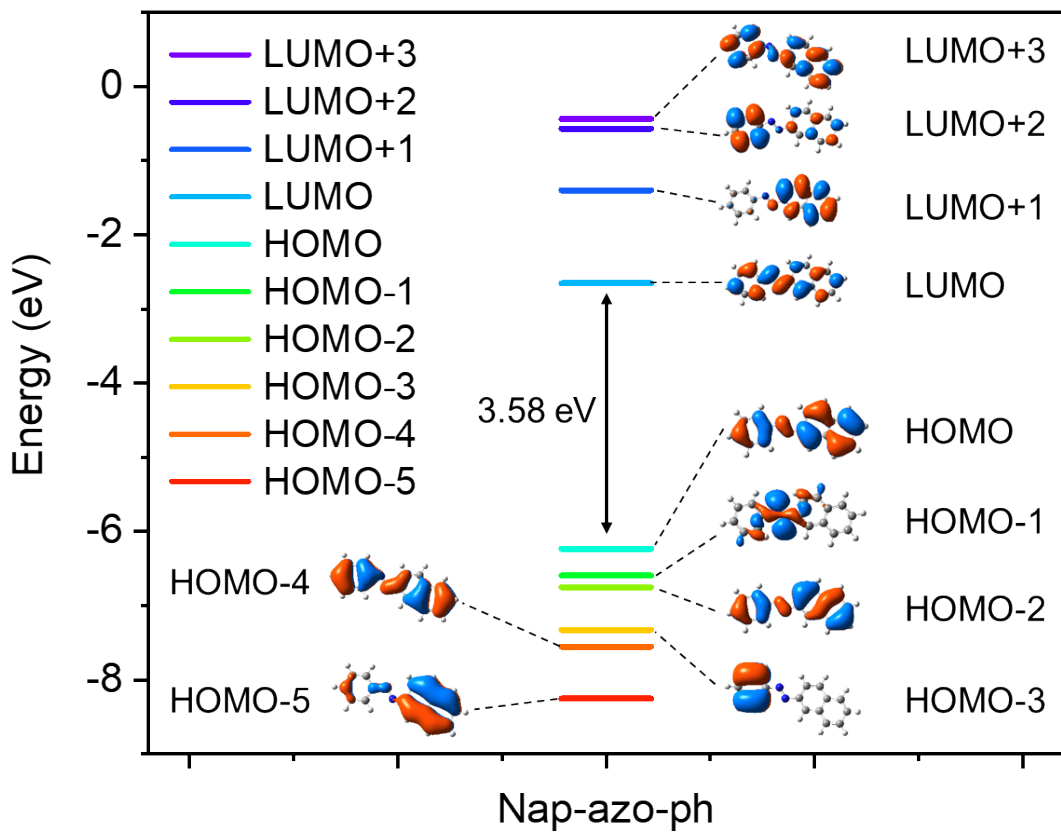

Figure S6. Molecular orbital diagrams for azo **1**.

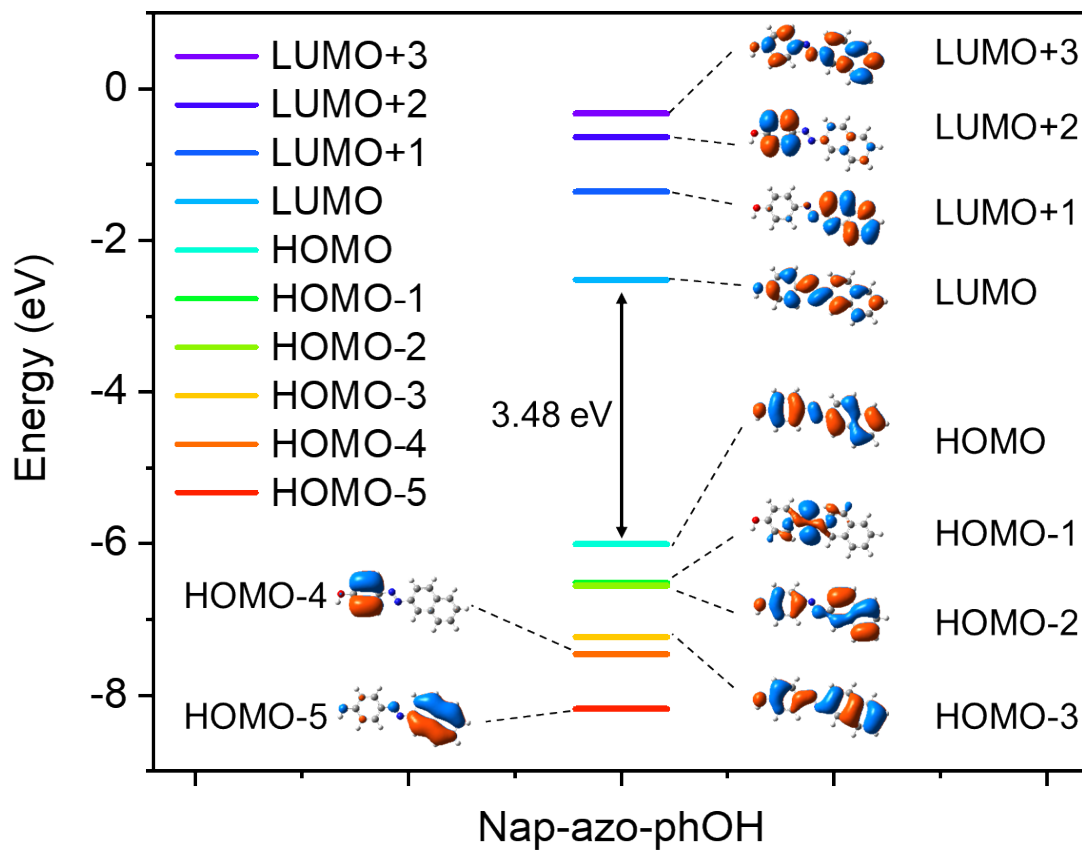

Figure S7. Molecular orbital diagrams for azo 2.

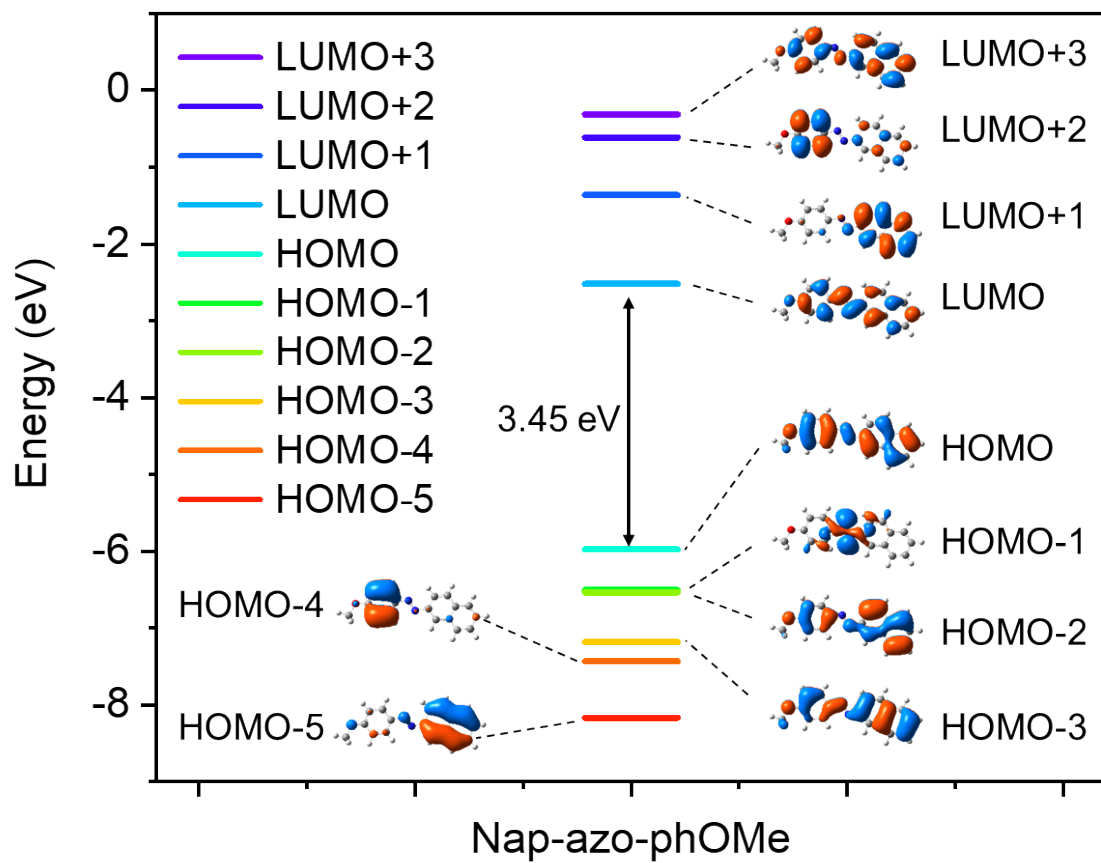

Figure S8. Molecular orbital diagrams for azo 3.

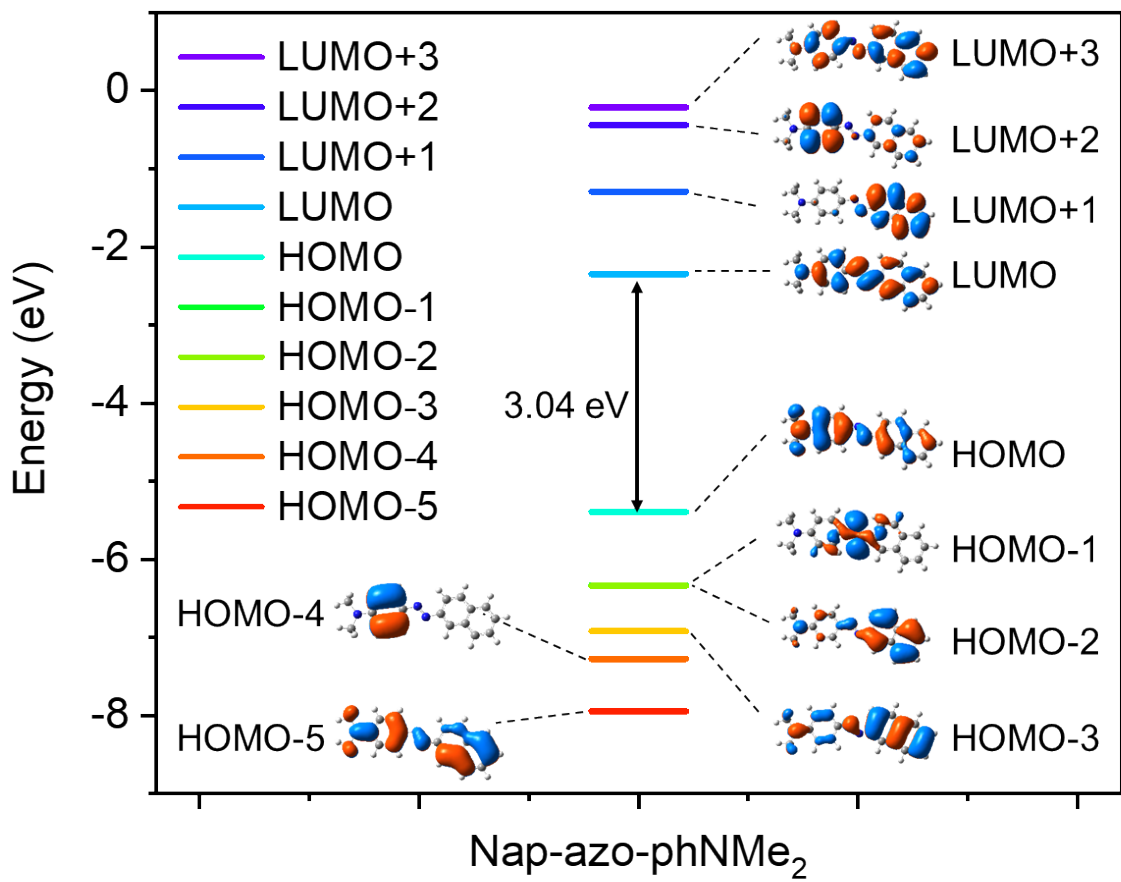

Figure S9. Molecular orbital diagrams for azo 4.

## Transient Absorption Fitting

For each of the azo dyes **1 – 4**, we show the heat map of our TAS data before and after the chirp correction is applied in a single SI figure (Figures S10, S12, S14, S16). In a second figure (Figures S11, 13, 15 and 17), we show a multi-panel series of data, fits and analysis of the fits. We provide here a detailed explanation of each panel of figures S11, 13, 15 and 17 below.

In figures S11, 13, 15 and 17, the top left panel labeled “Raw Data Surface” is the original data for each dye after chirp correction, and other data preparation are applied. Global analysis fitting is performed providing a model featuring DADS and associated lifetimes as shown in Figure 5 in the text (and in the bottom left panel of the SI figure). Combining the DADS, lifetimes, time zero, and IRF produced by the fit model, the TAS surface is “reconstructed”. The reconstructed data surface is shown in the top middle panel, labeled “Reconstructed Surface”. From this surface a selection of spectra are presented in the bottom middle panel labeled “Reconstructed Representative Spectra”. Finally, the original data is compared to the reconstructed data in the right most column. Top right panel is a heat map of the residual between the original data surface and the reconstructed surface. The residual surface was used to evaluate the global analysis fit. Fit models were selected or modified in order to reduce or remove structure from the residual surface. Residual surfaces lacking distinct features and more closely resembling noise, resulted in a favoring of that fit. The root mean square error (RSE) value was calculated for each residual surface as a measure of how well that fit matched the data surface. This value was also used to identify fit improvements when differences became difficult to identify visually. RSE values were only used to judge improvements to fits for the same data surface, and were not assessed between data surfaces. On the lower right panel, single wavelength TAS data at a range of lifetime (dotted data points) are displayed. Solid lines representing the single wavelength traces constructed using the fitted lifetimes from global analysis overlay the data. This plot is another method of evaluating the fits obtained using global analysis.



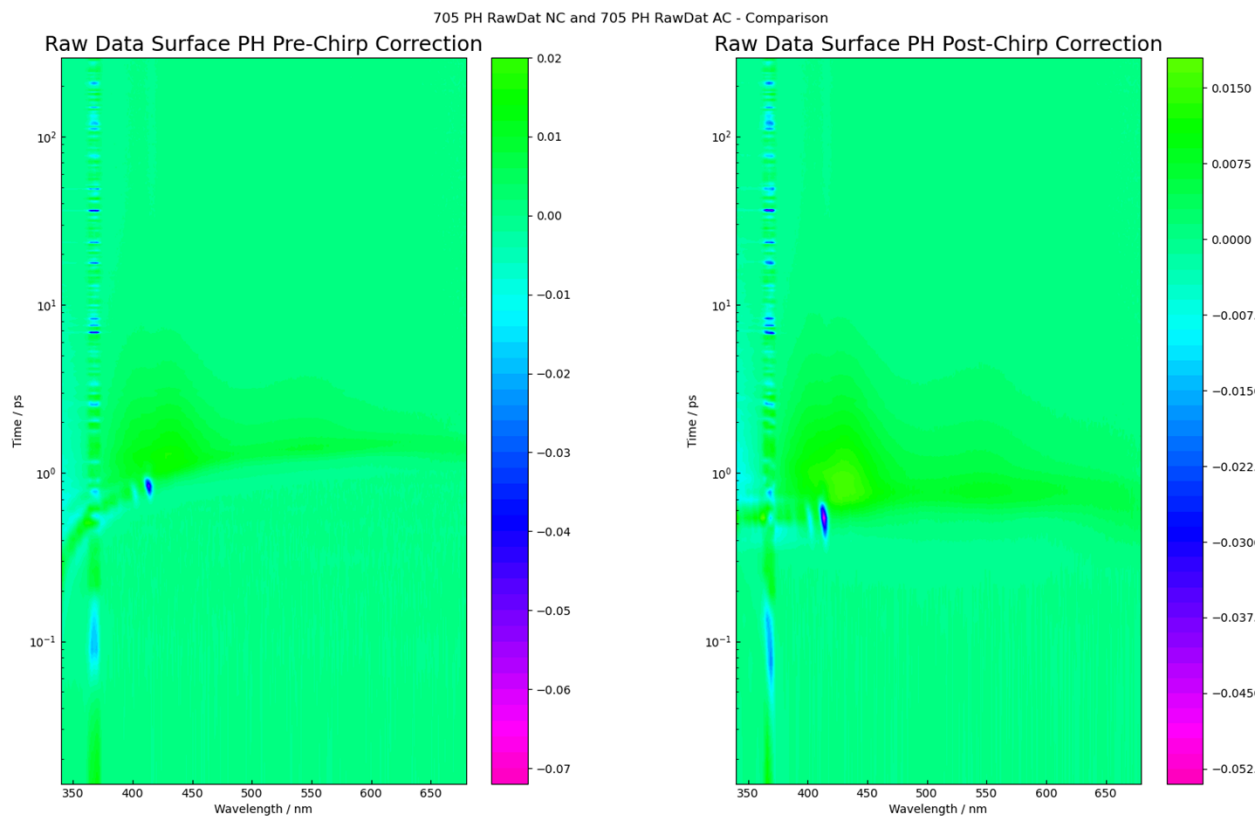

**Figure S10. Heat map of 1 TAS a) before b) after chirp correction.**

(left) Raw pump-probe heat map at 370 nm excitation. x-axis = wavelength; y-axis = delay step position (exponential spacing); color map corresponds to  $\Delta A$ . (right) corrected linear time pump-probe map at 370 nm excitation for the first 500 ps. x-axis = wavelength; y-axis = delay step position; color map corresponds to  $\Delta A$ .

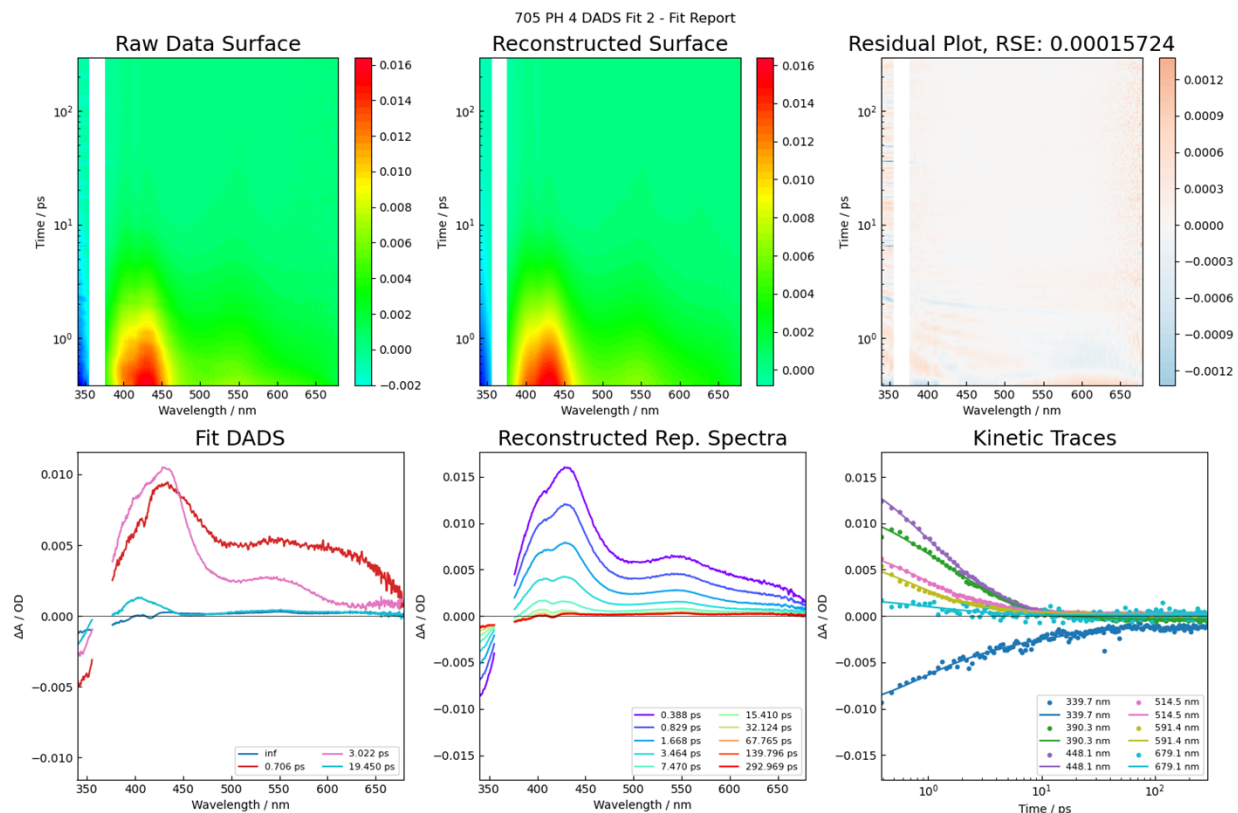

**Figure S11. TAS heat map, global analysis fitting and analysis of fit for 1 collected at 370 nm excitation.**

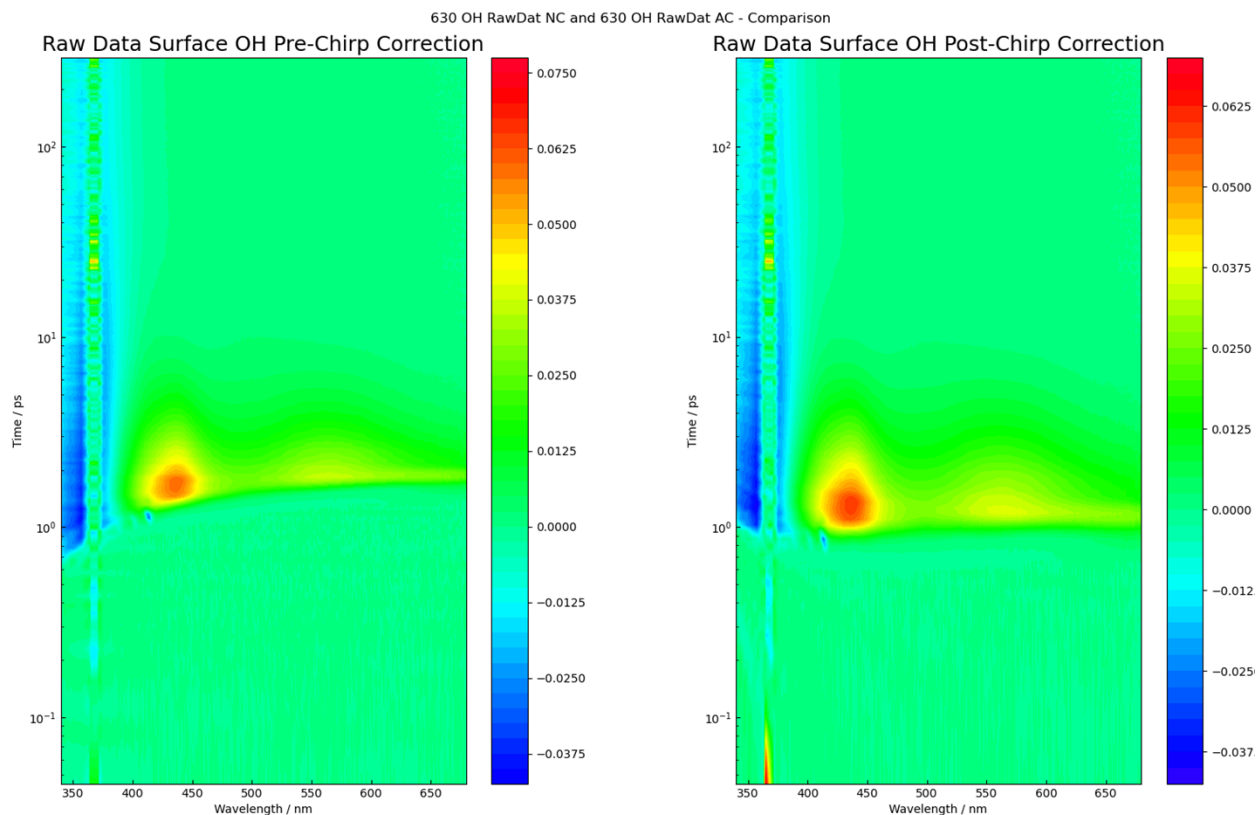

**Figure S12. Heat map of 2 TAS a) before b) after chirp correction.**

(left) Raw pump-probe heat map at 370 nm excitation. x-axis = wavelength; y-axis = delay step position (exponential spacing); color map corresponds to  $\Delta A$ . (right) corrected linear time pump-probe map at 370 nm excitation for the first 500 ps. x-axis = wavelength; y-axis = delay step position; color map corresponds to  $\Delta A$ .

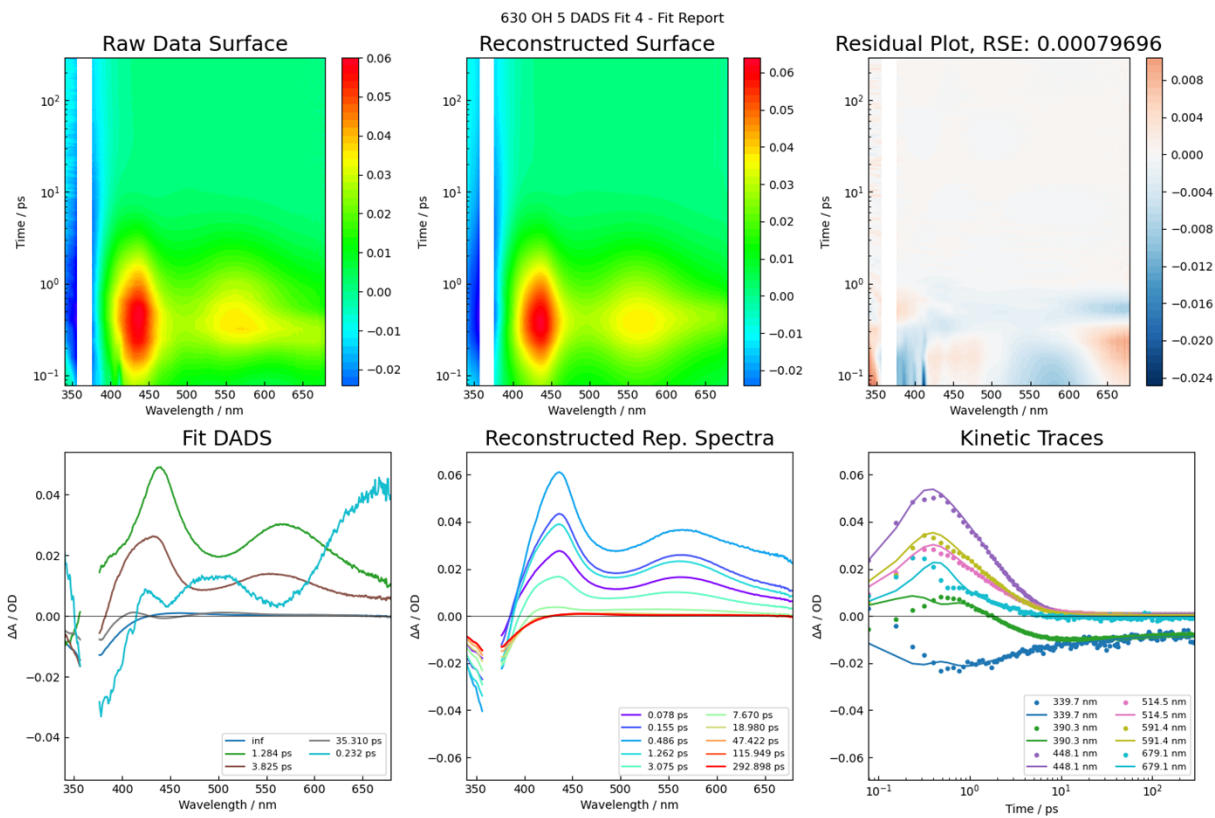

**Figure S13. TAS heat map, global analysis fitting and analysis of fit for 2 collected at 370 nm excitation.**

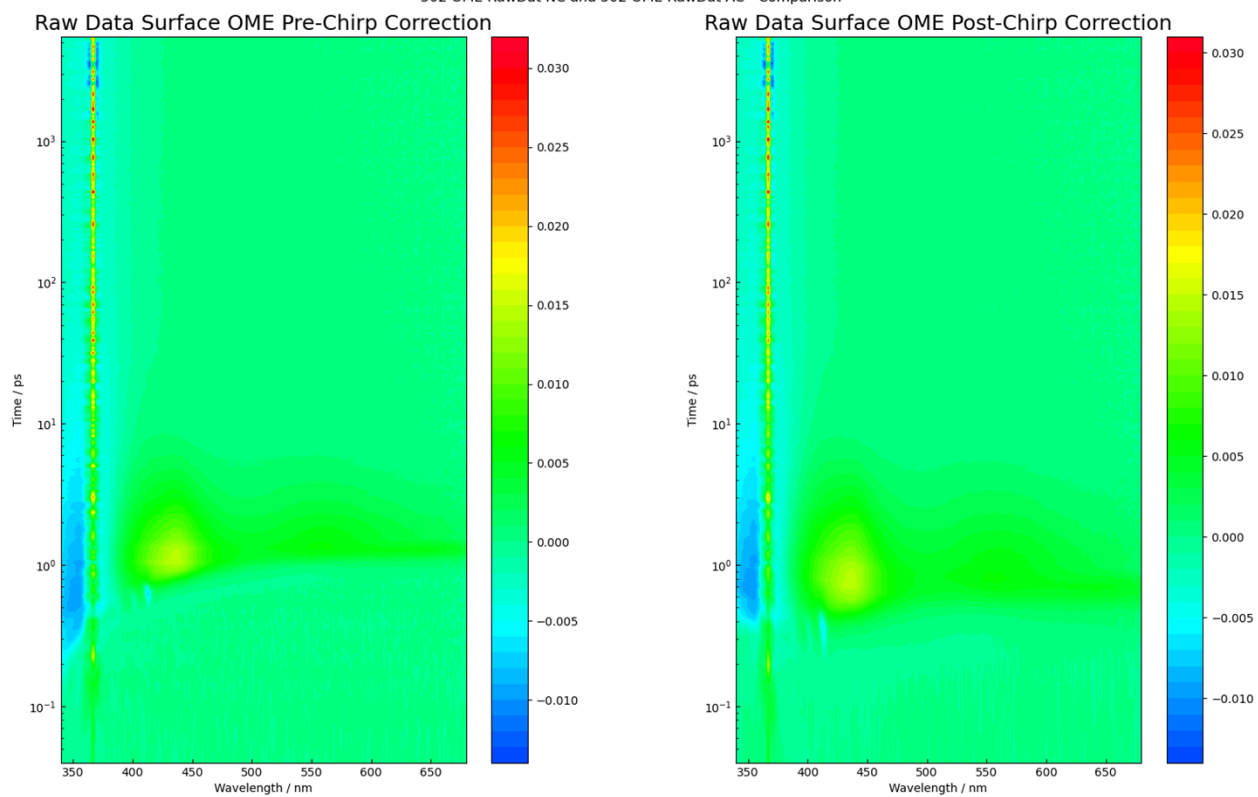

**Figure S14. Heat map of 3 TAS a) before b) after chirp correction.**

(left) Raw pump-probe heat map at 370 nm excitation. x-axis = wavelength; y-axis = delay step position (exponential spacing); color map corresponds to  $\Delta A$ . (right) corrected linear time pump-probe map at 370 nm excitation for the first 500 ps. x-axis = wavelength; y-axis = delay step position; color map corresponds to  $\Delta A$ .

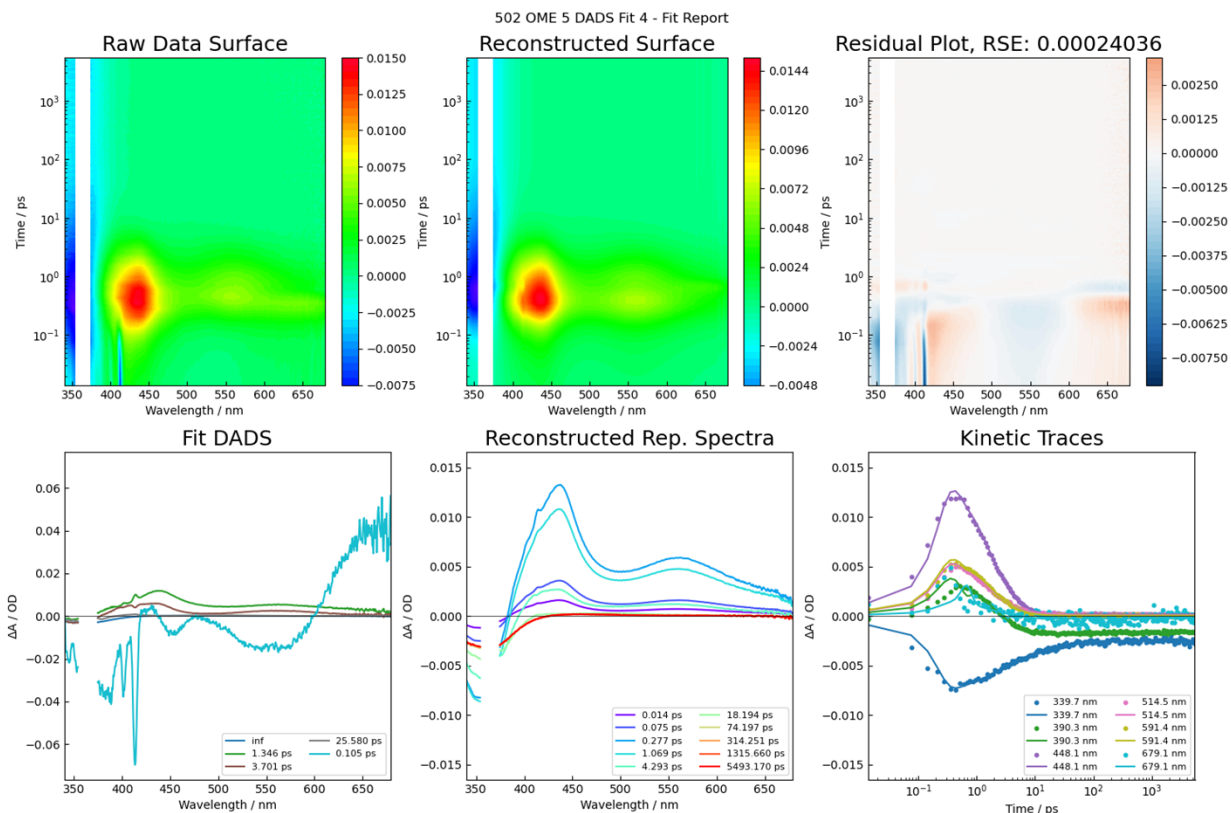

**Figure S15. TAS heat map, global analysis fitting and analysis of fit for 3 collected at 370 nm excitation.**

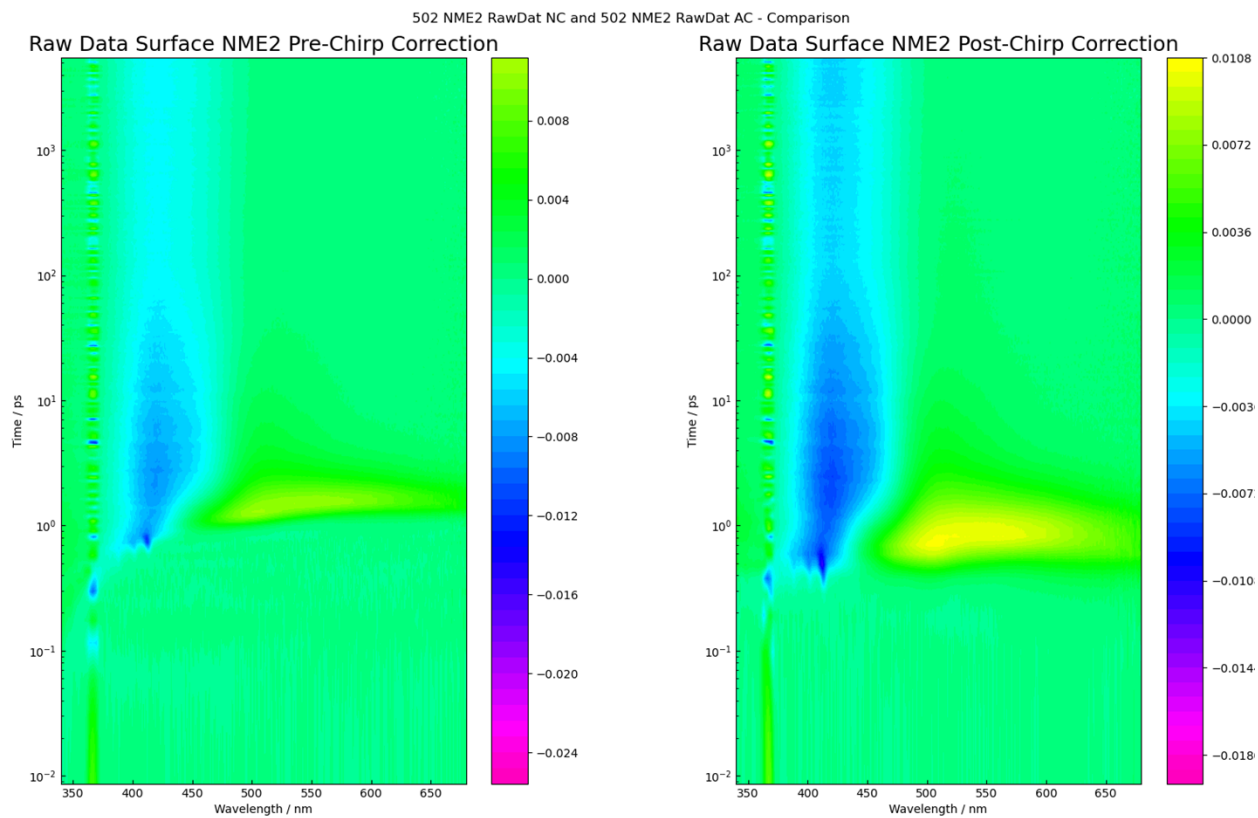

**Figure S16. Heat map of 4 TAS a) before b) after chirp correction.**

(left) Raw pump-probe heat map at 370 nm excitation. x-axis = wavelength; y-axis = delay step position (exponential spacing); color map corresponds to  $\Delta A$ . (right) corrected linear time pump-probe map at 370 nm excitation for the first 500 ps. x-axis = wavelength; y-axis = delay step position; color map corresponds to  $\Delta A$ .

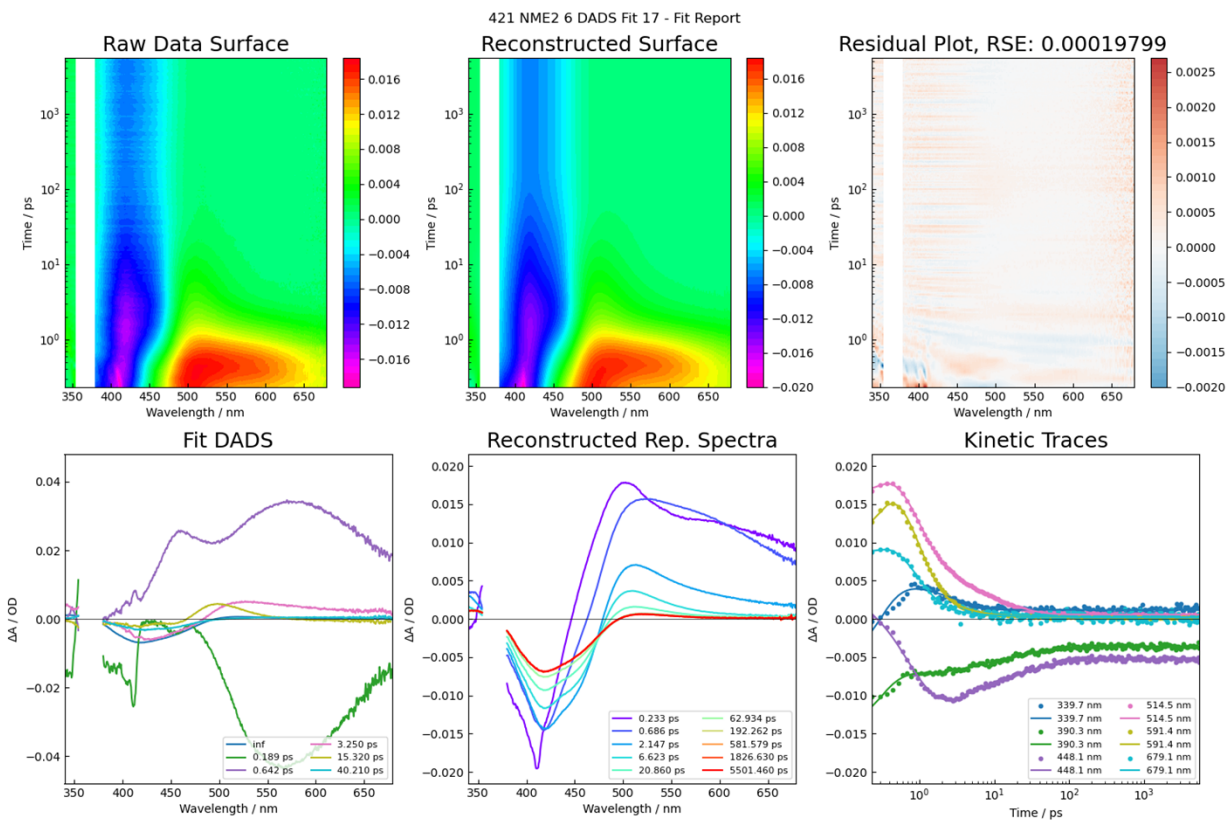

**Figure S17. TAS heat map, global analysis fitting and analysis of fit for 4 collected at 370 nm excitation.**



## Fit of azobenzene data taken on our instrument

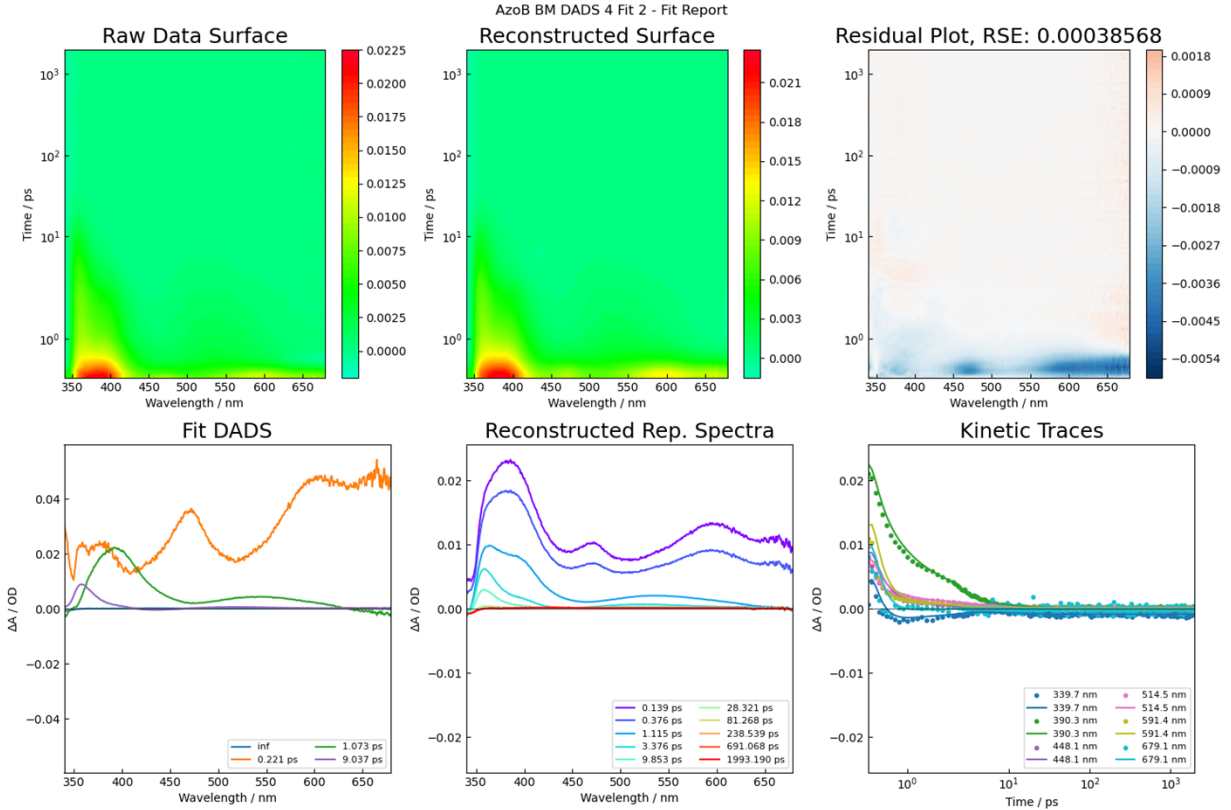

## Comparison of 1 (left two panels) and azobenzene (right two panels) showing representative spectra and DADS

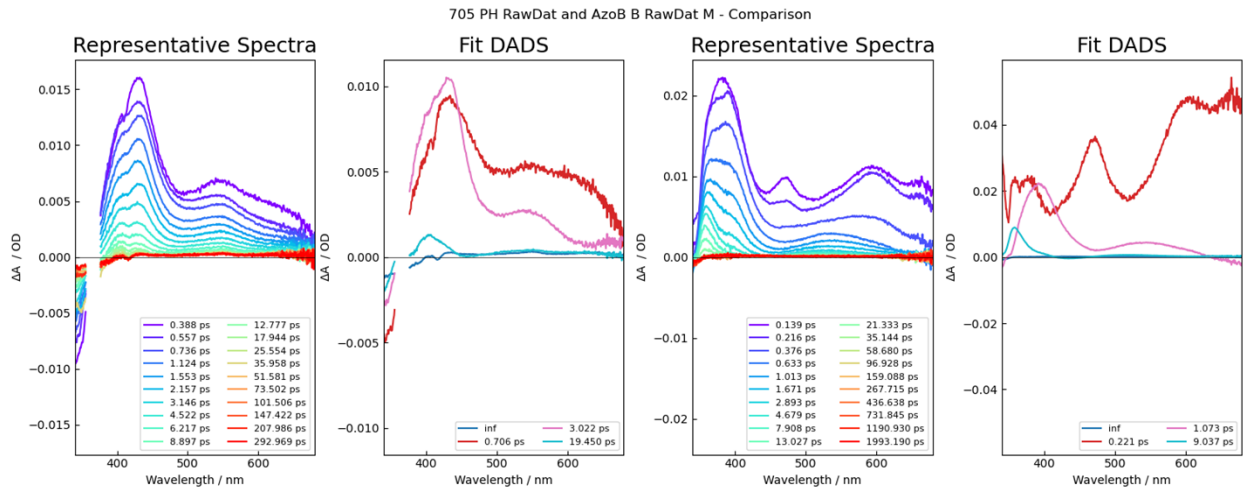

**Schematic Diagram of the Relaxation of azo 1 – 3 , 4, and azobenzene.**

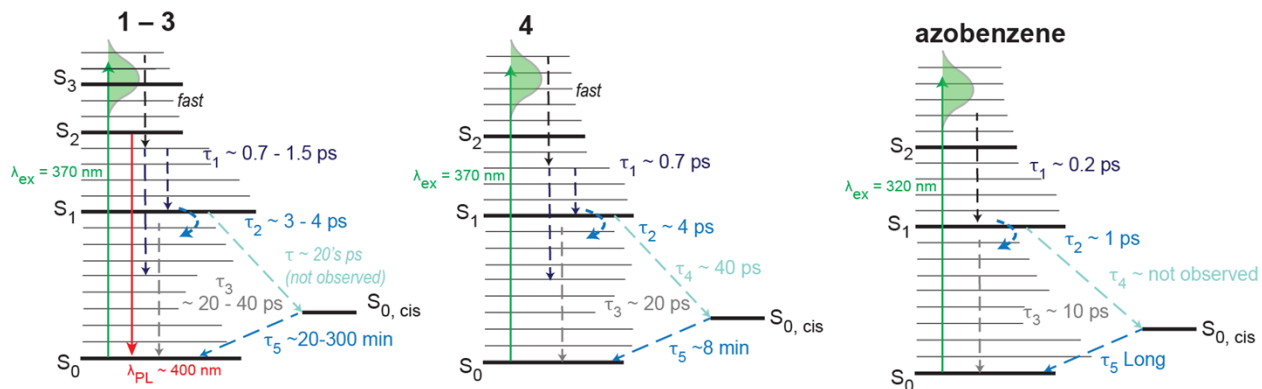

**Figure S18. Comparison of azobenzene with 1-4 on our TAS instrumentation.**

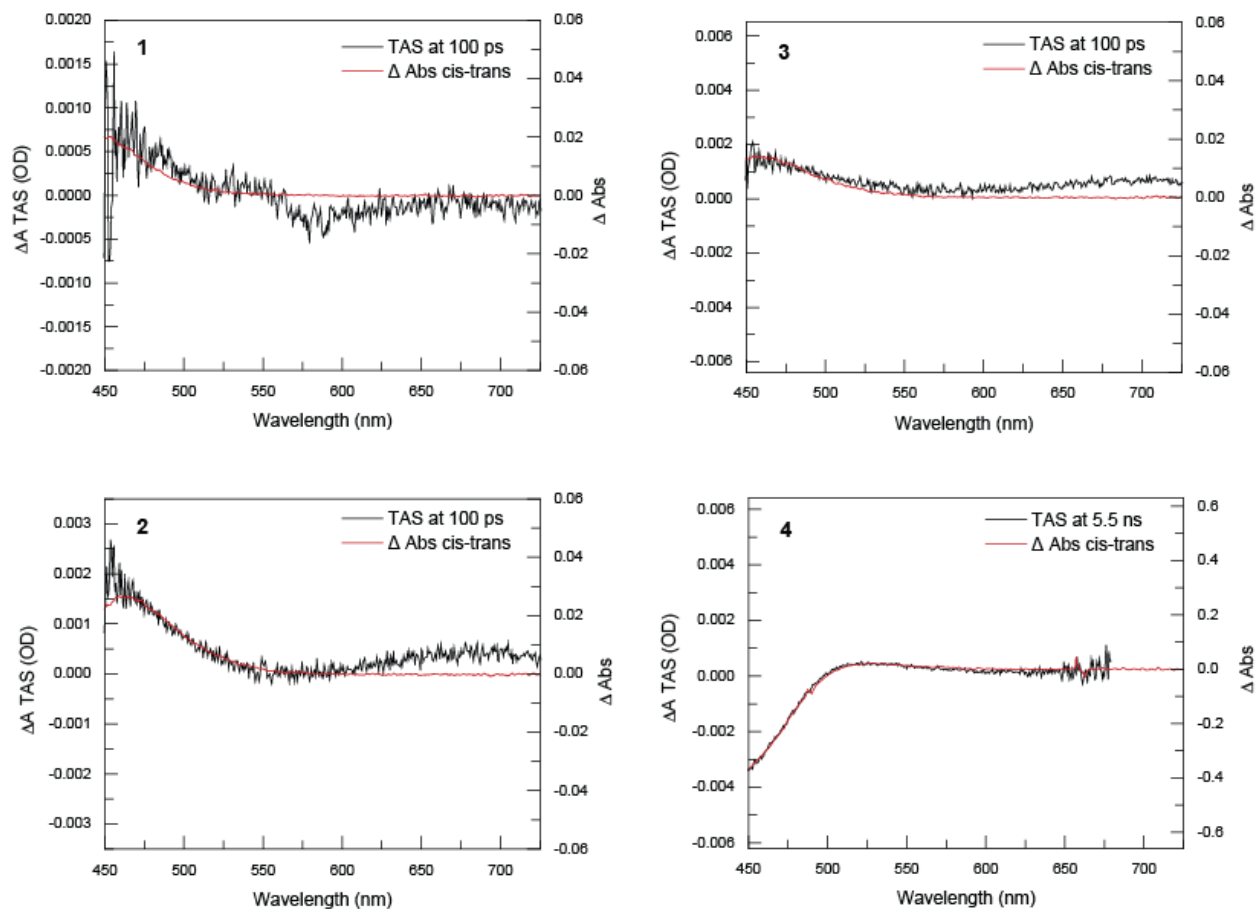

**Figure S19. Comparison of TAS residual spectrum with the difference of the steady-state absorption spectra of the *trans*- and *cis*- isomer of 1-4.**

## Triplet Potential Energy Curves of Azo **1** and **4**

In order to evaluate the potential for intersystem crossing into the triplet excited state manifold, we first evaluated the alignment of the vertical Frank-Condon singlet and triplet excited-state surfaces (center line Figure S20). Assuming that the potential intersystem crossing happens rapidly, with a typical lifetime of several picoseconds, spin-orbit-couplings (SOC) between singlet and triplet excited states at the ground state minimum geometry provide a quantitative measure (Table S13) of the probability for singlet excited states to cross into the triplet manifold.

In order to identify possible deactivation mechanisms of the initially generated excited state singlets through a triplet intermediate, the spin orbit coupling between the excited singlets ( $S_1$  and  $S_2$ ) with the triplets in the same energy region ( $T_1 - T_3$ ) were calculated (center line in Figures S20 and S21). The SOC (Table S13) between  $S_1$  and  $T_1$  of azo **4** is  $4.1 \text{ cm}^{-1}$ , four times the coupling in azo **1 - 3** ( $0.98 - 1.04 \text{ cm}^{-1}$ ), indicating a fast, low-energy pathway to generate a triplet. However, the SOC between  $S_1$  and  $T_3$  is high for all the dyes ( $3.19 - 4.97 \text{ cm}^{-1}$ ), indicating several possible intersystem crossing pathways to generate triplets ( $T_1 - T_3$ ) from singlet excitations ( $S_1 - S_2$ ). Therefore, a possible photophysical fate of azo dyes **1 - 4** is formation of a triplet state.

Another consideration in a triplet mediated deactivation pathway is the strength of the coupling of the triplets back to the ground state surface. The SOC constants between  $T_1$  and  $S_0$  ( $\langle S_0 | \hat{H}_{\text{SOC}} | T_1 \rangle$ ) are all close to  $38 \text{ cm}^{-1}$  for azo **1 - 3**, more than two orders of magnitude larger than azo **4** ( $\text{SOC } 0.07 \text{ cm}^{-1}$ ). Inversely, the SOC between  $T_2$  and  $S_0$  of azo **1 - 3** ( $0.09 - 0.28 \text{ cm}^{-1}$ ) are two orders of magnitude smaller than azo **4** ( $37.2 \text{ cm}^{-1}$ ). The  $\langle S_0 | \hat{H}_{\text{SOC}} | T_3 \rangle$  of all four azo dyes are low ( $0.22 - 0.24 \text{ cm}^{-1}$ ). This indicates a rapid  $T_1 \rightarrow S_0$  ground state recovery in azo **1 - 3** and a slower  $T_1 \rightarrow S_0$  ground state recovery in azo **4**. Additionally, in azo **4** direct intersystem crossing pathways are available to generate  $T_1$  from the singlet excited manifold ( $S_1 \rightarrow T_1$ , *vide supra*). While the  $T_2 \rightarrow S_0$  intersystem crossing in azo **4** has strong SOC, it would be competing with faster internal conversion of the excited state population to the lowest energy triplet ( $T_1$ ). Thus a possible ground-state recovery pathway in **4** could be through the lowest energy ( $T_1$ ). Interestingly, any perturbation of the structure, along both the torsional and inversion surfaces, increase the  $\langle S_0 | \hat{H}_{\text{SOC}} | T_1 \rangle$ .

While the triplets generated in azo **1 - 3** are unlikely to be long-lived, due to fast deactivation back to the ground state, in azo **4** the lowest triplet excited state could be stable with a longer lifetime, due to poor SOC back to the ground state. This difference in  $\langle S_0 | \hat{H}_{\text{SOC}} | T_1 \rangle$  is readily apparent in the dramatic differences in the spin density of azo **1 - 3** vs. azo **4**

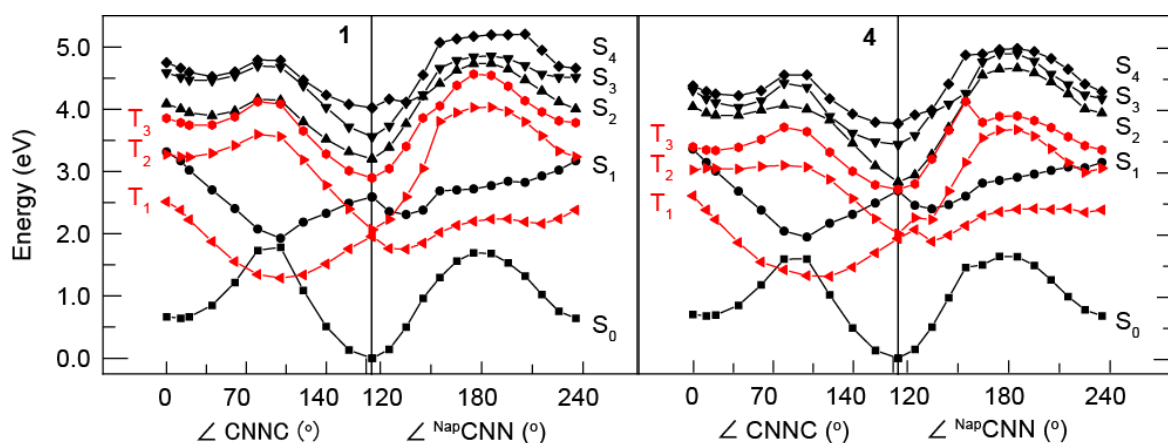

**Figure S20.** Singlet and triplet PECs below 5 eV in energy along the torsional ( $\angle \text{CNNC}$ ) and inversion ( $\angle \text{NapCNN}$ )  $S_0$  trans-cis isomerization. The excited state (TDDFT) surfaces above each shown point are plotted and like excited states are connected with lines (black singlets and red triplets). B3LYP/6-311G(d,p)/PCM(ACN). The relaxed triplet ( $T_1$ ) surfaces are shown in Figure S39-40.

(Figure S36). In particular, the  $T_1$  state in azo **1** – **3** is a mixed  $n$  and  $\pi$  density, while in azo **4** the density only has  $\pi$  character.

We have carried out several experiments on azo dyes **3** and **4** within our laboratory and thus far have been unable to collect experimental evidence of the triplet. We have thus far been unable to detect low-energy phosphorescence from either azo dye that would directly verify the triplet formation and decay. Additionally, we have attempted to sensitize oxygen and record the emission spectrum for singlet oxygen emission. Both of these methods likely fail because of the low predicted energy of the triplet. Based on DFT (Figure S20) if the triplet emission occurred from the Franck-Condon state, emission would be predicted to occur between 620 nm – 830 nm ( $\sim 2.0$  eV), which is already difficult to detect and partially outside the window of our spectrometer. If, however, the emission occurred from a relaxed triplet, the energy transfer to triplet oxygen forming singlet oxygen is energetically uphill (see Figure S20,  $\angle\text{CNNC}$  of  $90^\circ - 100^\circ$ ) and we would expect to see no phosphorescence or sensitization of oxygen. Further, we attempted to react **3** and **4** with the radical TEMPO (2,2,6,6-Tetramethyl-1-piperidinyloxy) to form a photo-induced radical-initiated product. These reactions have thus far yielded no conclusive evidence of triplet formation. In these experiments, the extremely short lifetimes of the azo dyes are a major impediment to bimolecular reactivity.

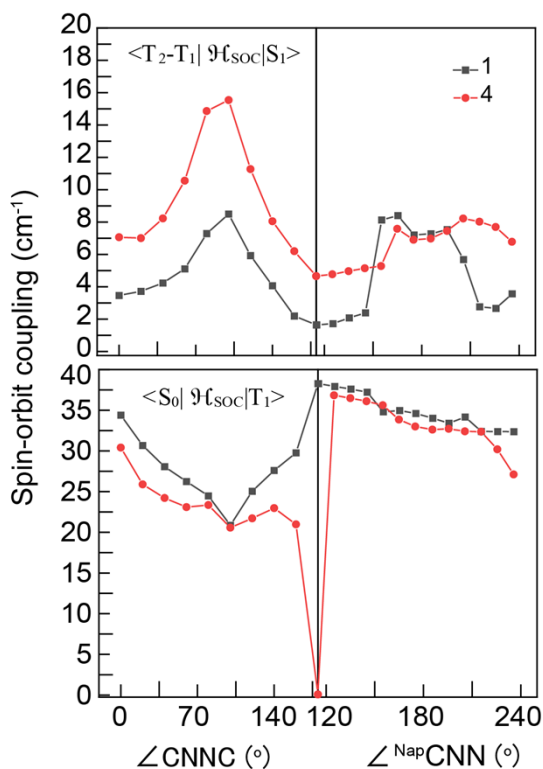

**Figure S21.** Spin orbit coupling between the first singlet and first two triplet excited states ( $\langle T_2-T_1 | \mathcal{H}_{\text{SOC}} | S_1 \rangle$  (top) and the lowest triplet and ground state ( $\langle S_0 | \mathcal{H}_{\text{SOC}} | T_1 \rangle$  (bottom) along the torsional ( $\angle\text{CNNC}$ ) and inversion ( $\angle^{\text{Nap}}\text{CNN}$ ) trans-cis isomerization. B3LYP/6-311G(d,p)/PCM(ACN).

S<sub>0</sub> geometries and transition states of Azo 1 - 4

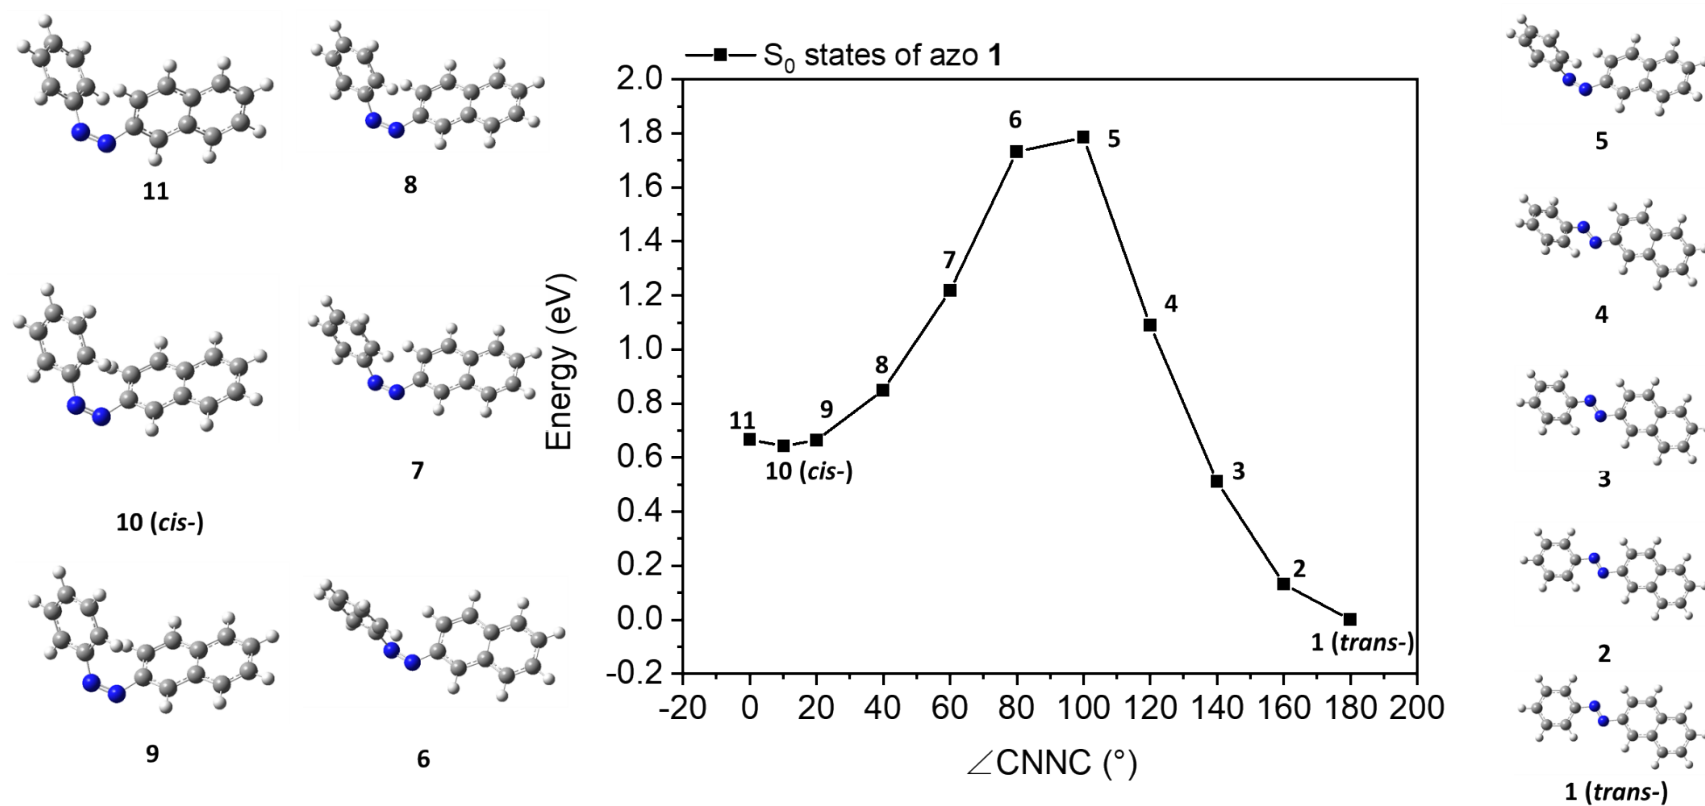

Figure S22. S<sub>0</sub> geometries of azo 1 with various  $\angle$ CNNC angles.

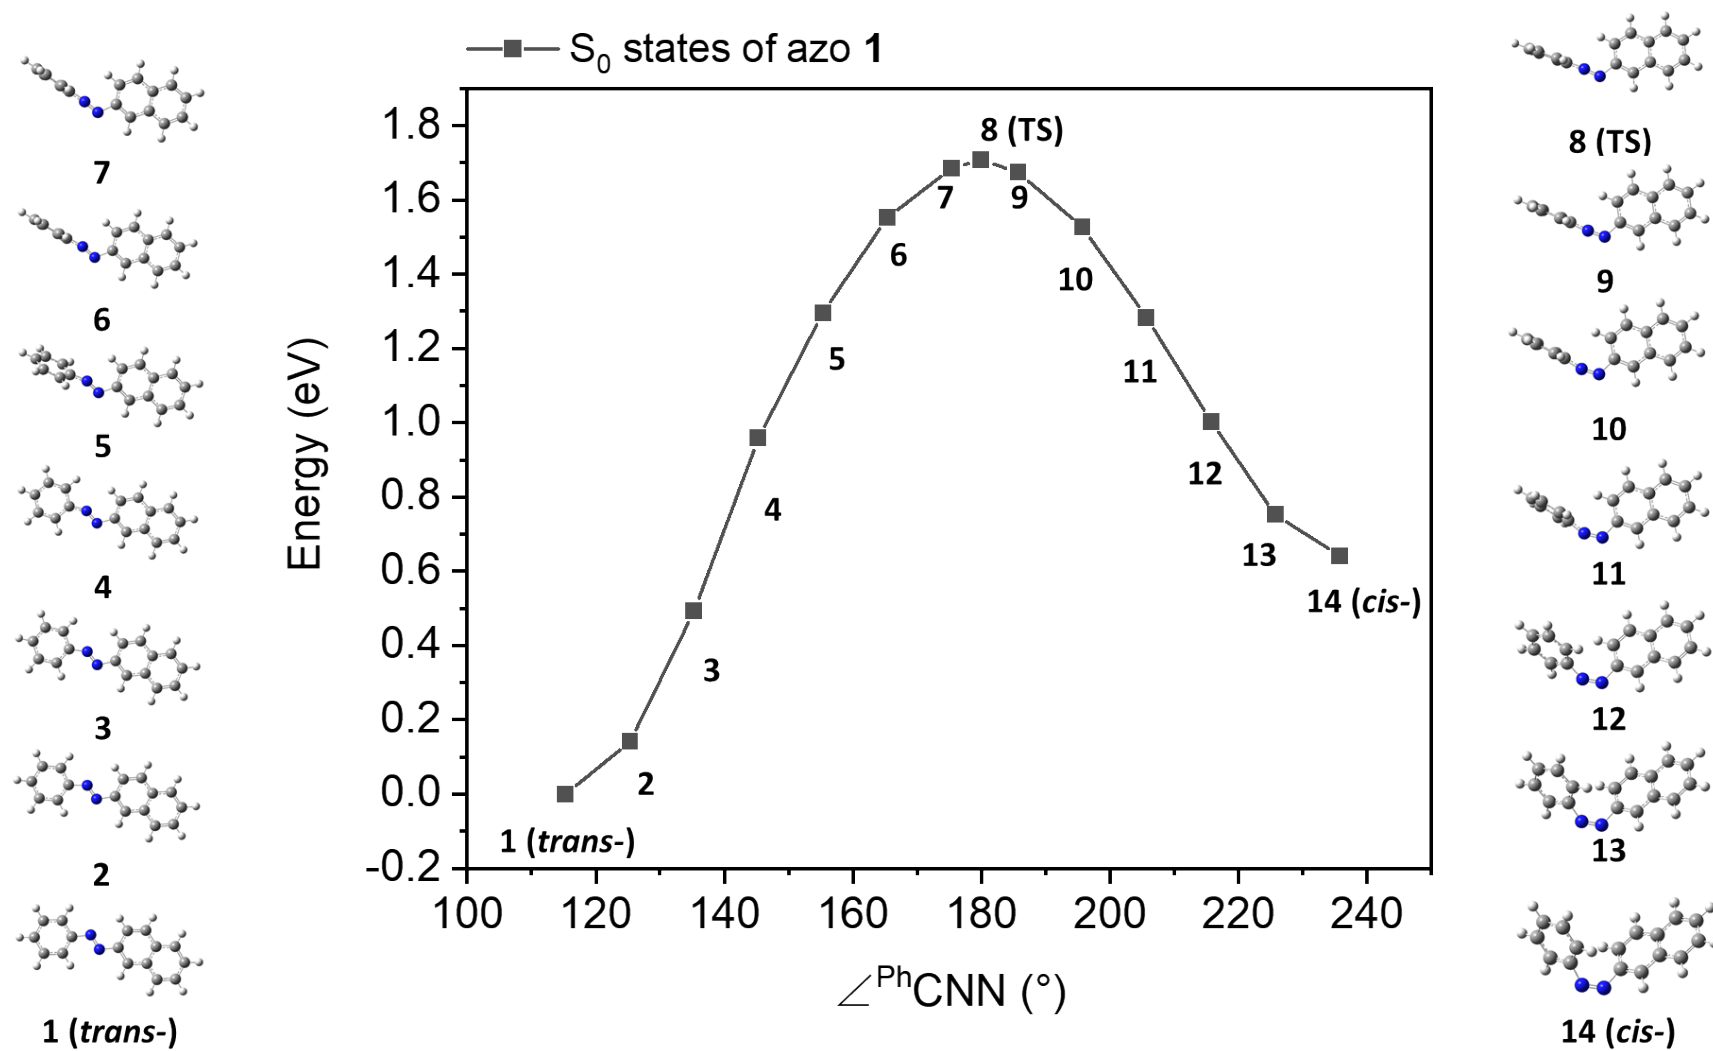

Figure S23.  $S_0$  geometries of azo 1 with various  $\angle^{\text{PhCNN}}$  angles.

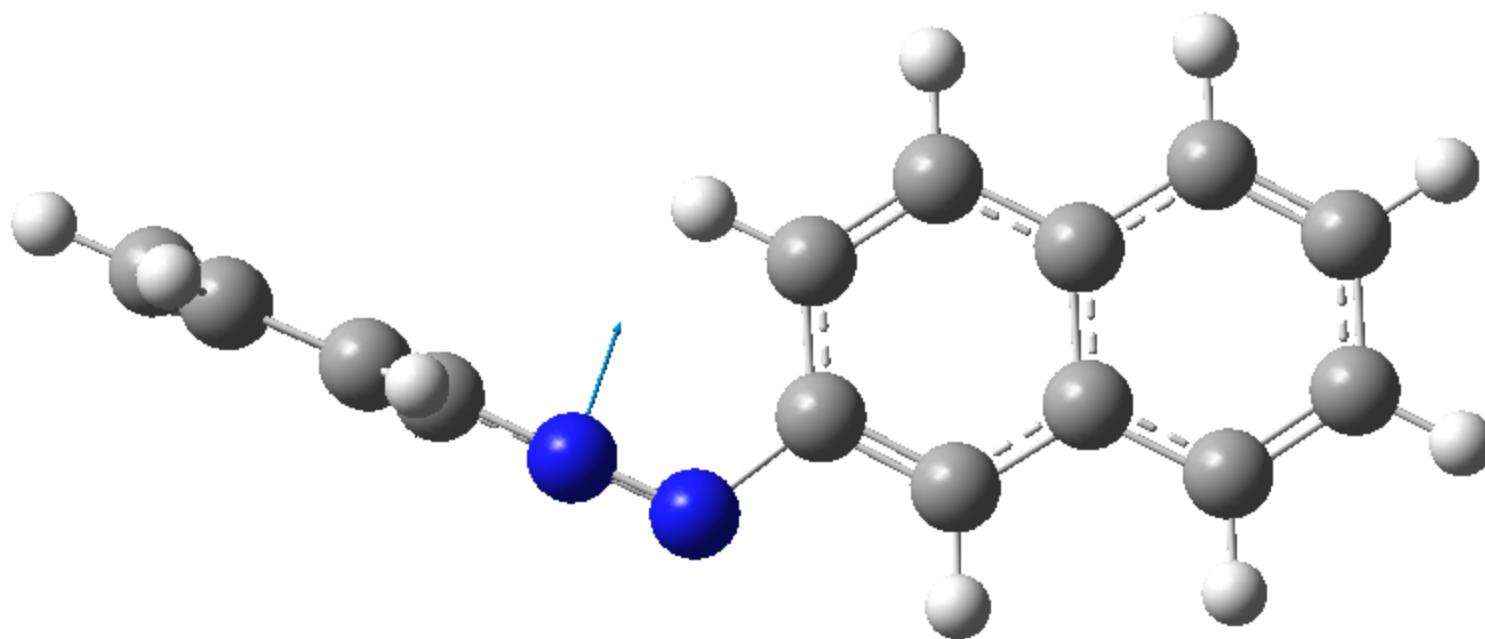

**Figure S24. Geometry of azo 1 transition state from point 8 in Figure S23. The imaginary vibrational mode at  $-409.97\text{ cm}^{-1}$  is indicated by the blue arrow**



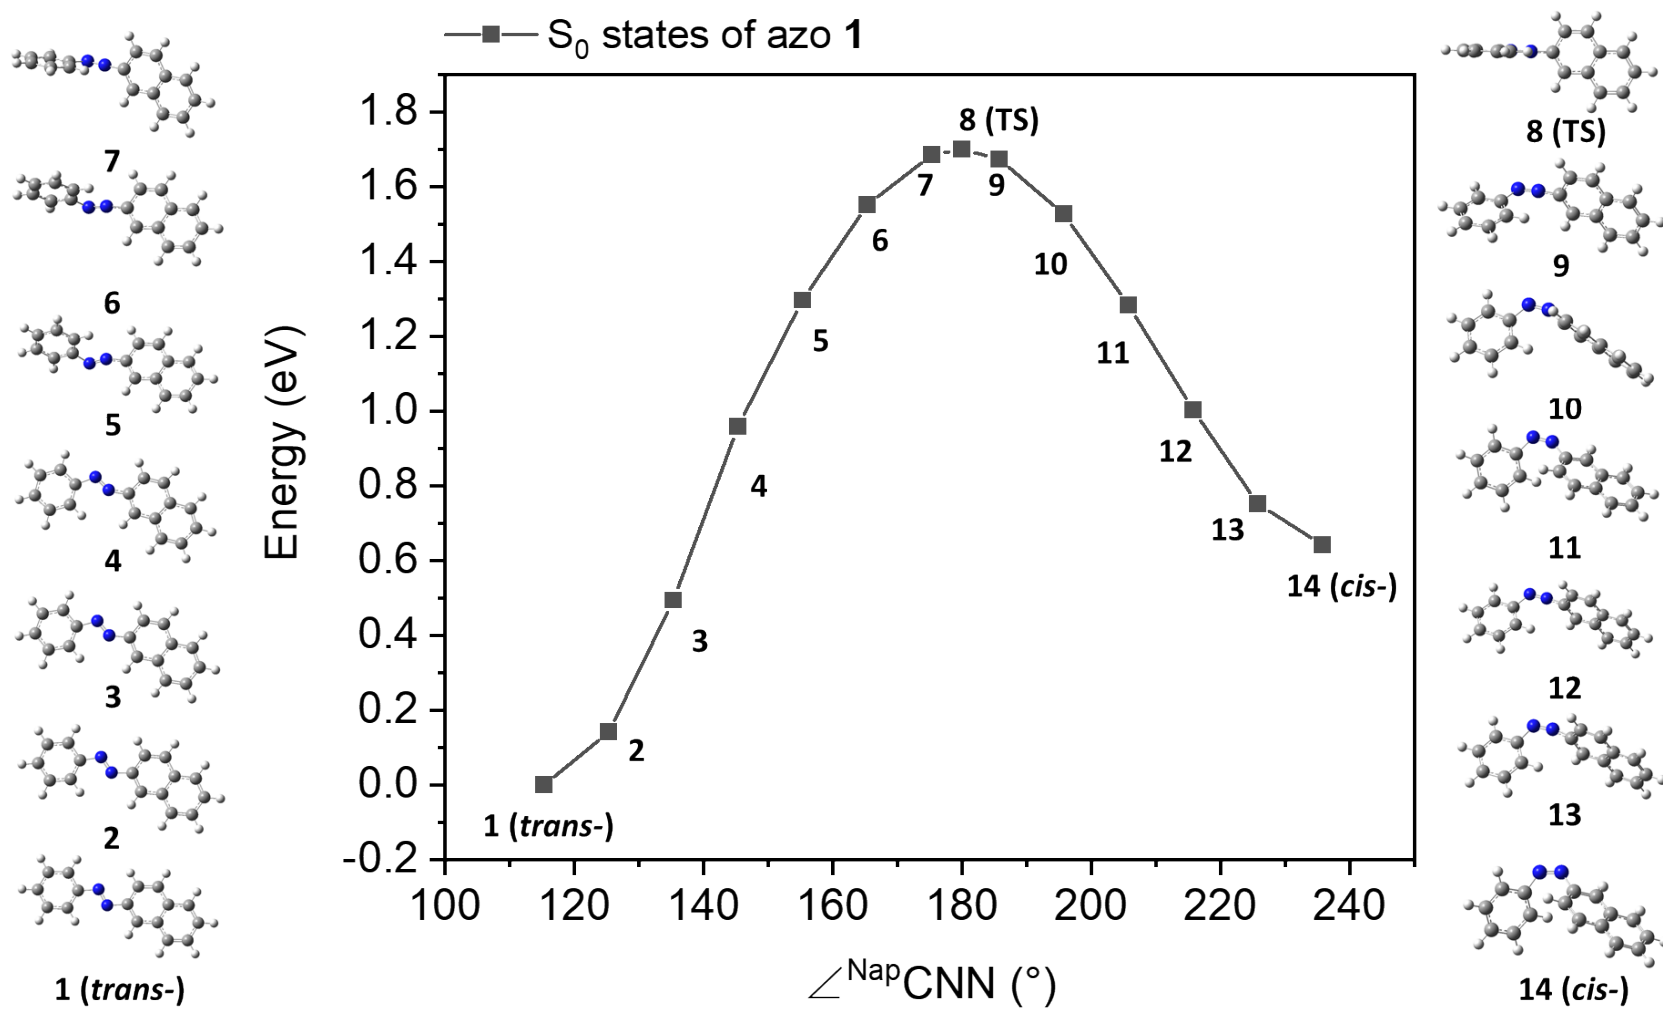

Figure S25.  $S_0$  geometries of azo 1 with various  $\angle^{\text{NapCNN}}$  angles.

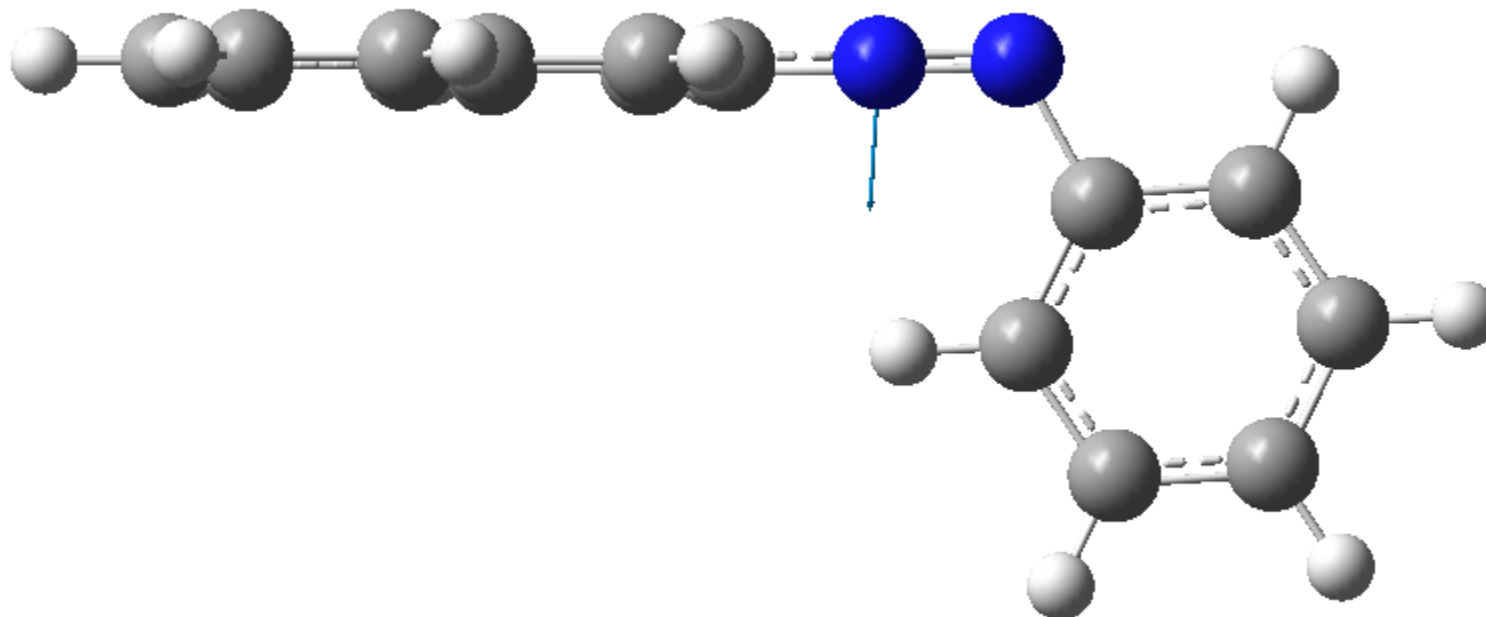

**Figure S26. Geometry of azo 1 transition state from point 8 in Figure S25. The imaginary vibrational mode at  $-404.81\text{ cm}^{-1}$  is indicated by the blue arrow**

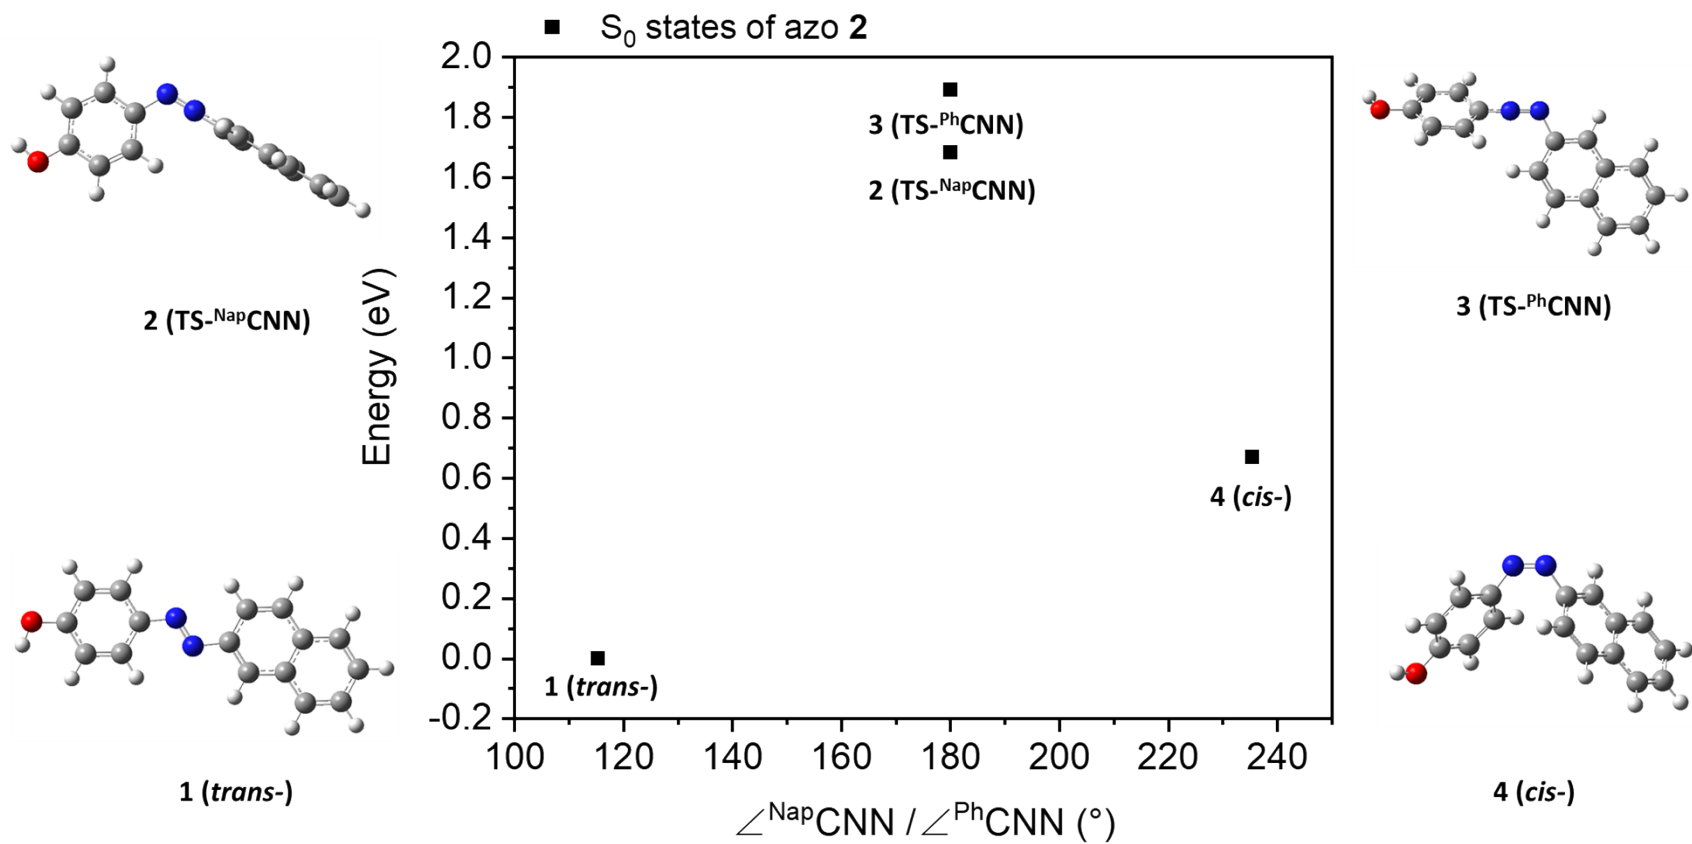

Figure S27. Geometry and relative energy of azo 2 transition states and the ground states at *trans*- and *cis*- configurations.

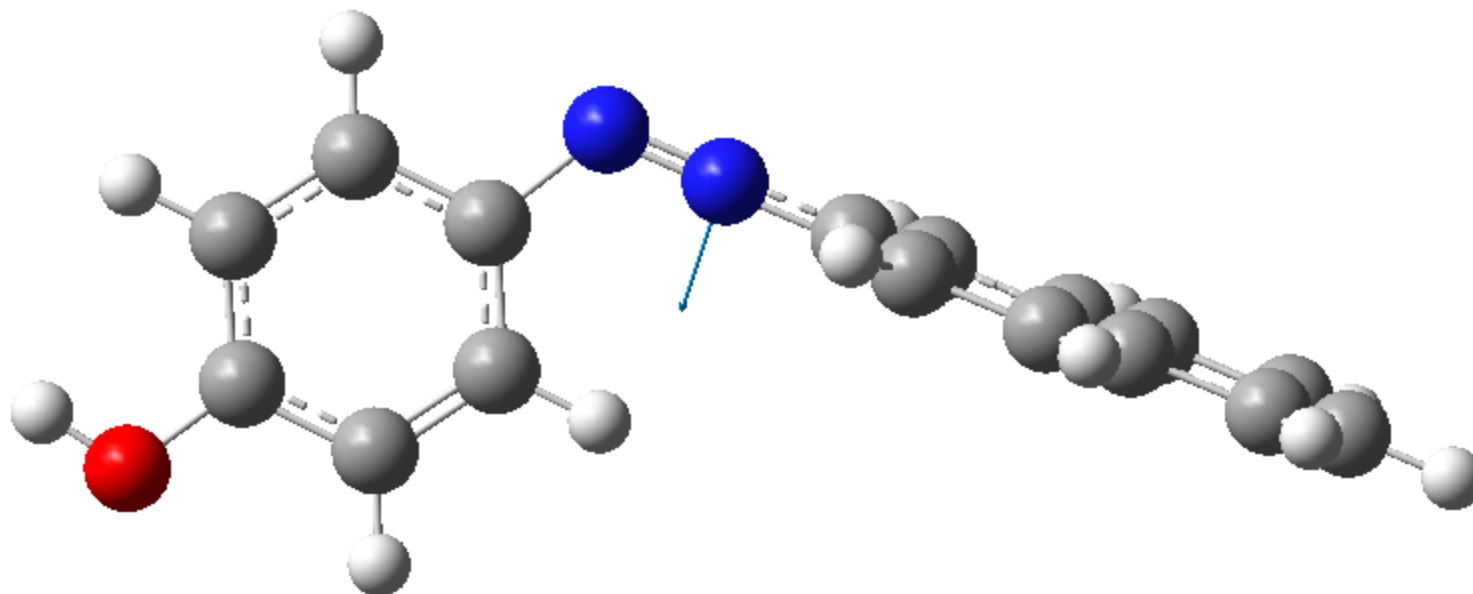

**Figure S28. Geometry of azo 2 transition state from point 2 in Figure S27. The imaginary vibrational mode at  $-398.49\text{ cm}^{-1}$  is indicated by the blue arrow.**

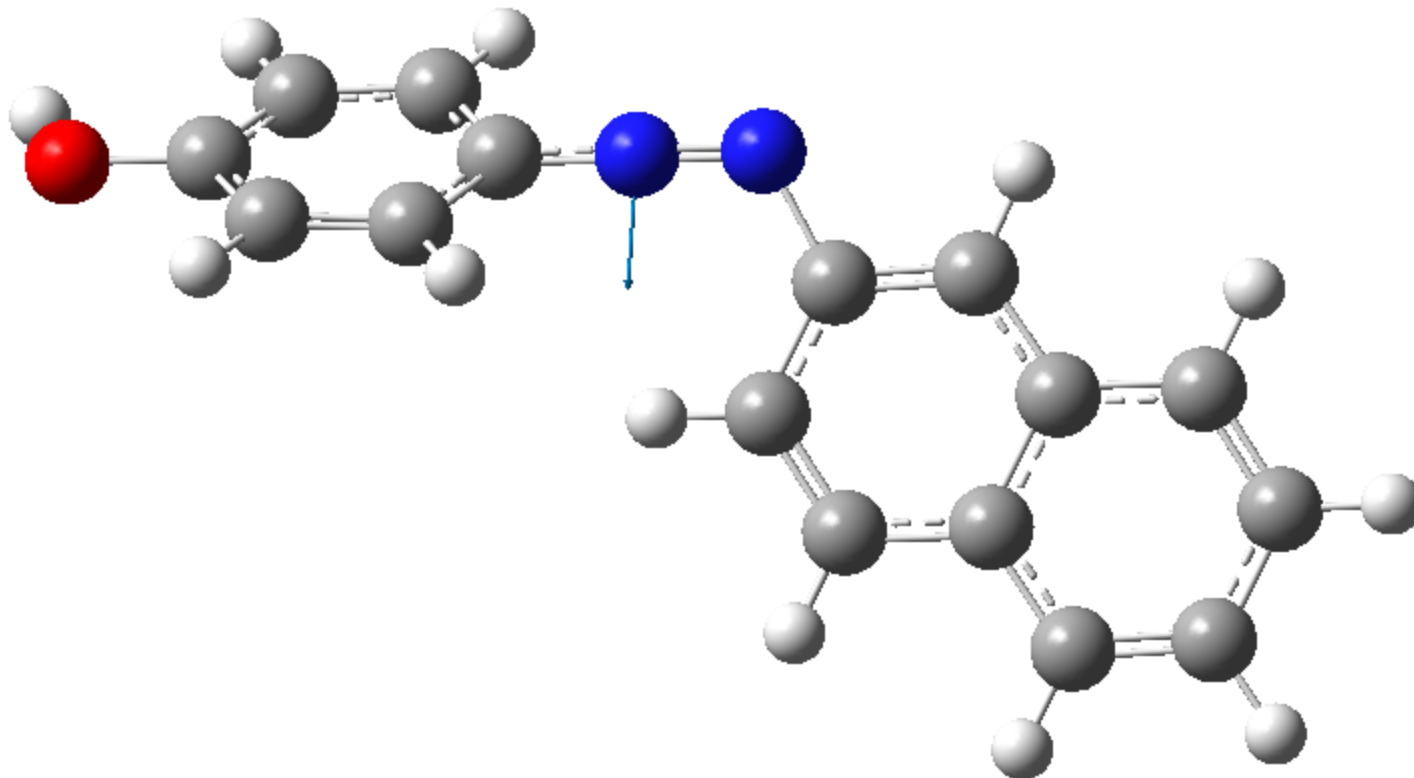

**Figure S29. Geometry of azo 2 transition state from point 3 in Figure S27. The imaginary vibrational mode at  $-459.90\text{ cm}^{-1}$  is indicated by the blue arrow.**

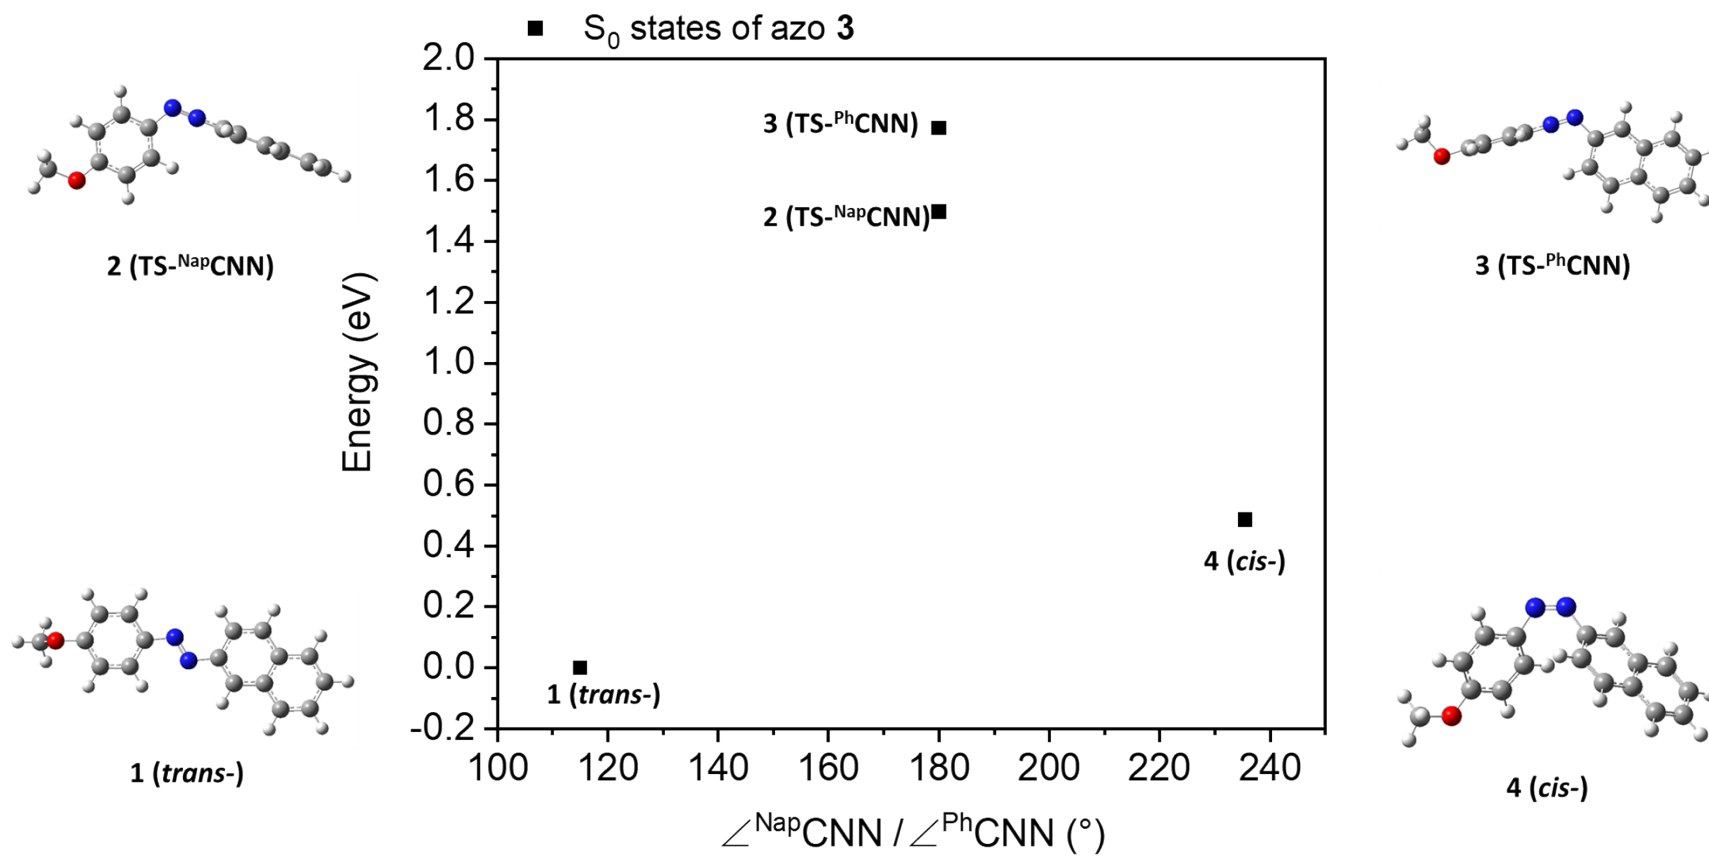

Figure S30. Geometry and relative energy of azo 3 transition states and the ground states at *trans-* and *cis-* configurations.

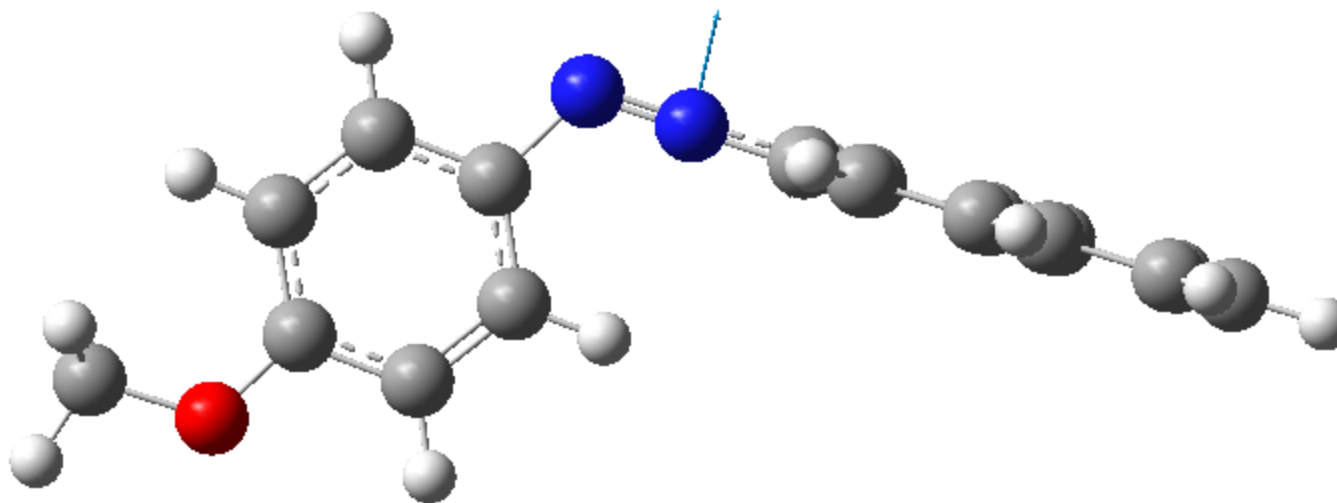

**Figure S31. Geometry of azo 3 transition state from point 2 in Figure S30. The imaginary vibrational mode at  $-397.45\text{ cm}^{-1}$  is indicated by the blue arrow.**

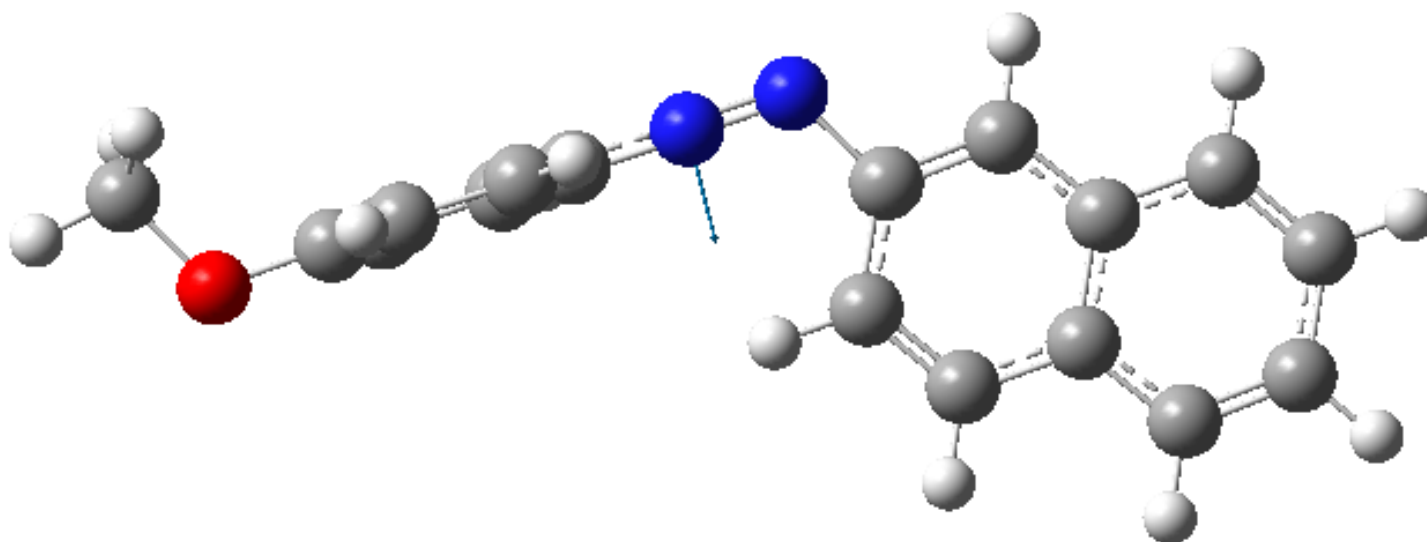

**Figure S32. Geometry of azo 3 transition state from point 3 in Figure S30. The imaginary vibrational mode at  $-422.82\text{ cm}^{-1}$  is indicated by the blue arrow.**



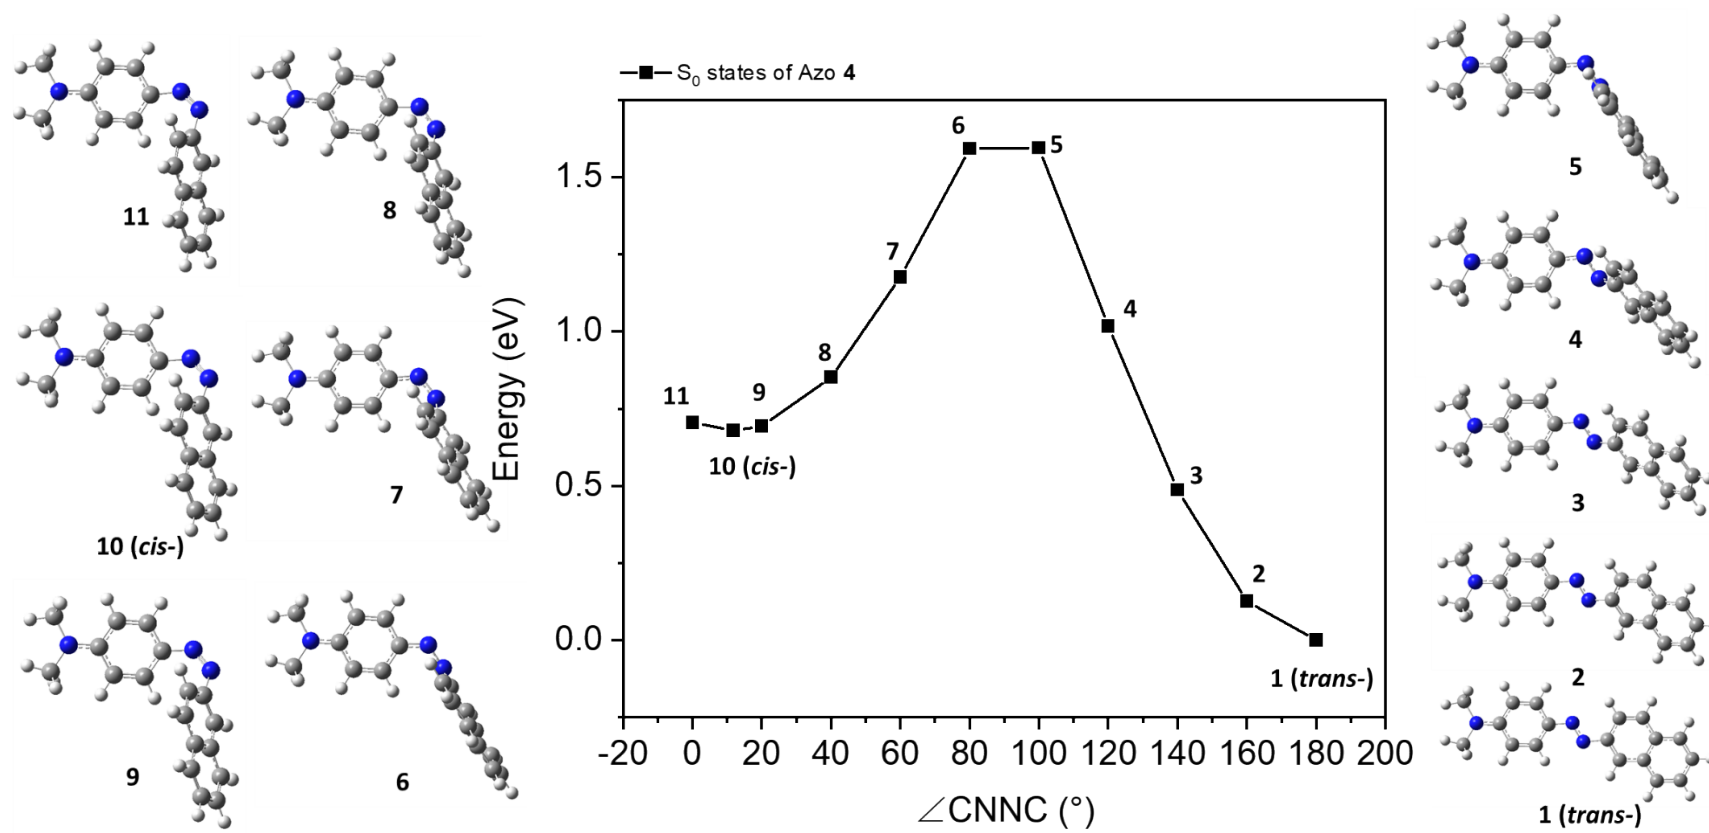

Figure S33.  $S_0$  geometries of azo 4 with various  $\angle\text{CNNC}$  angles.

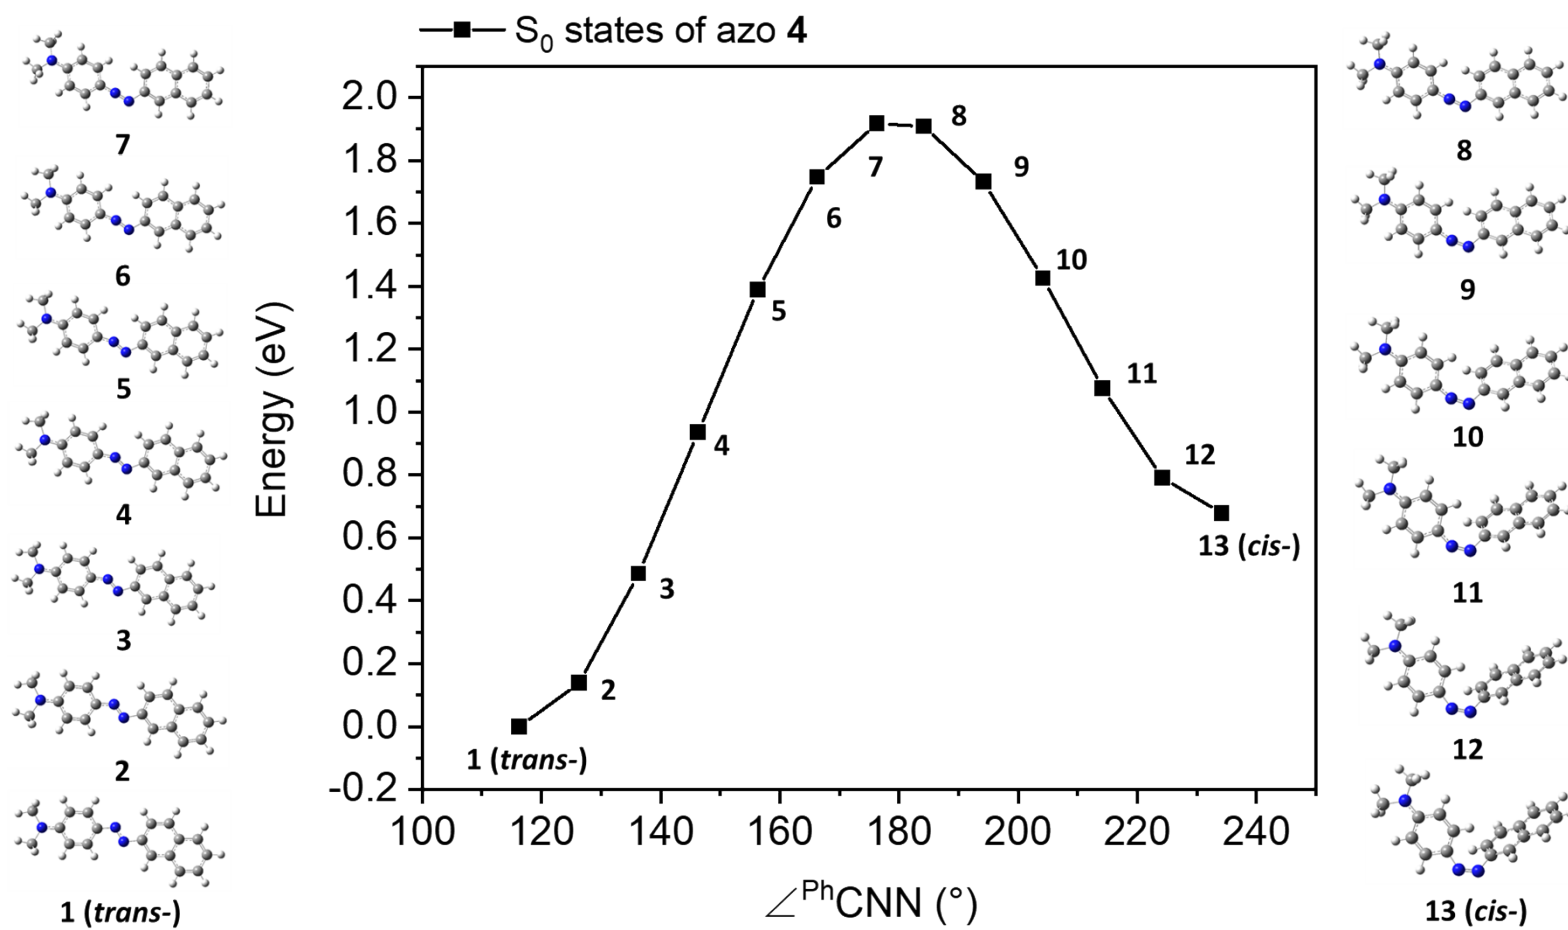

Figure S34.  $S_0$  geometries of azo 4 with various  $\angle^{\text{PhCNN}}$  angles.

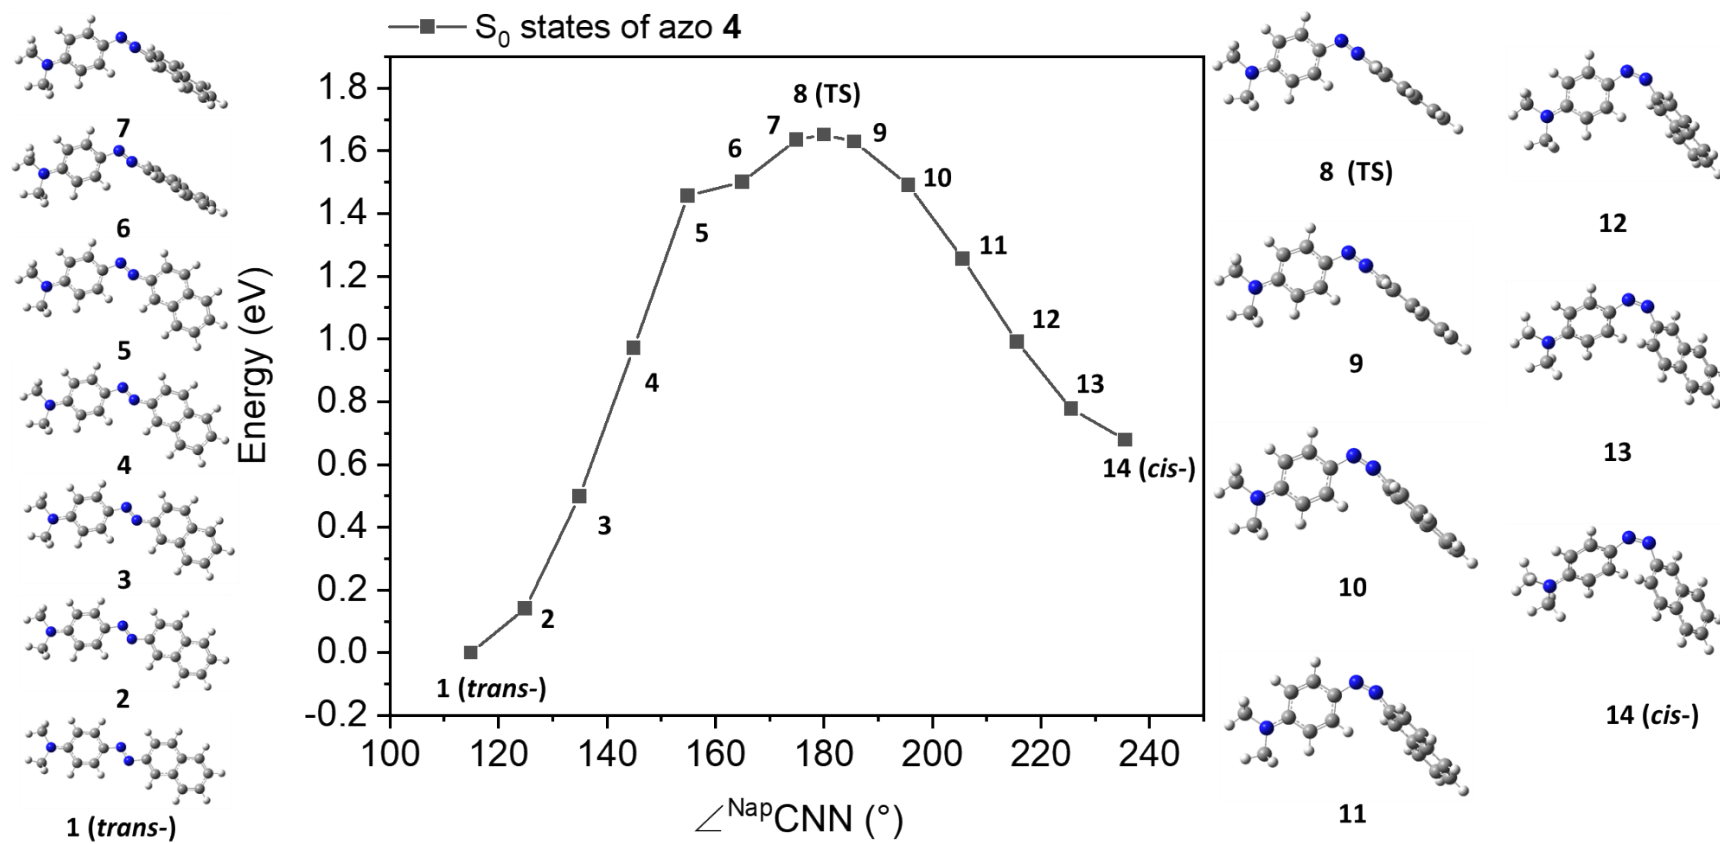

Figure S35.  $S_0$  geometries of azo 4 with various  $\angle^{\text{NapCNN}}$  angles.

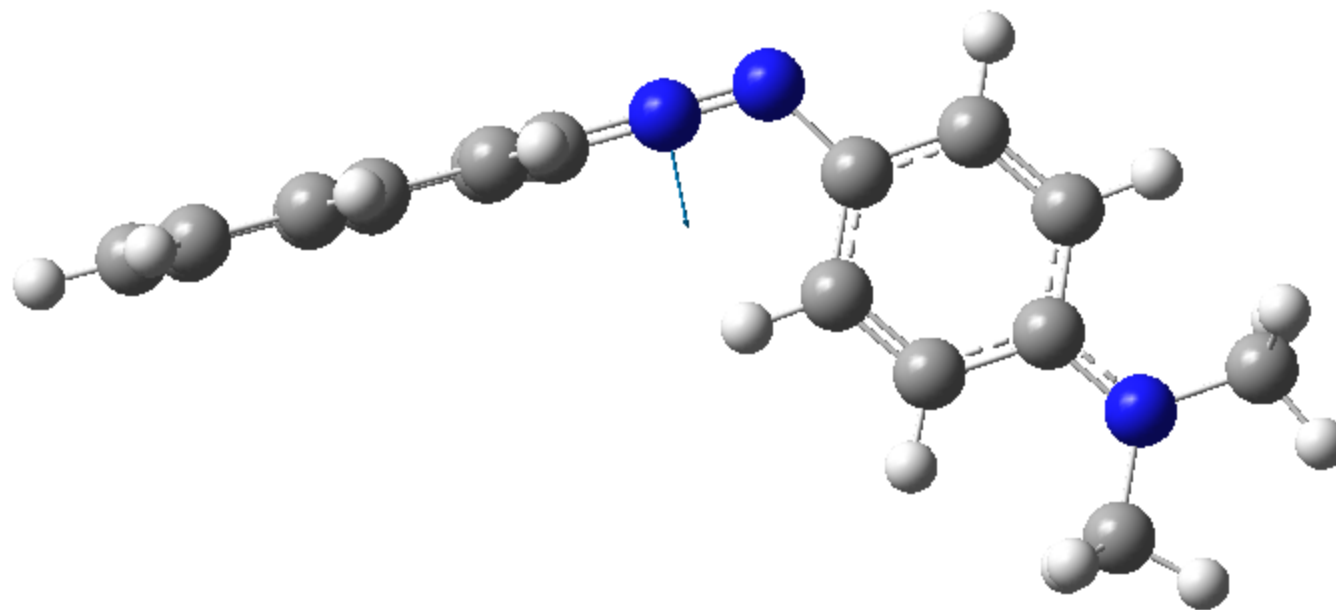

**Figure S36. Geometry of azo 4 transition state from point 8 in Figure S35. The imaginary vibrational mode at  $-384.14\text{ cm}^{-1}$  is indicated by the blue arrow.**

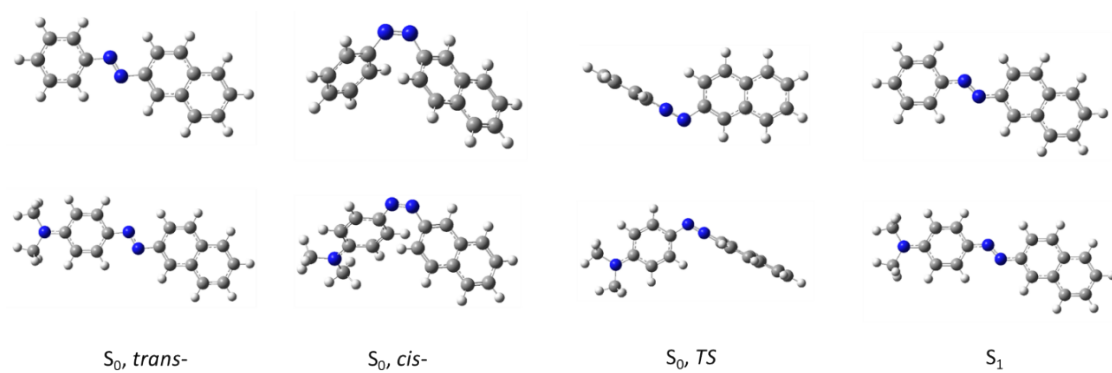

Figure S37. Comparing *trans*-, *cis*-, and transition states between azo 1 (top) and azo 4 (bottom).

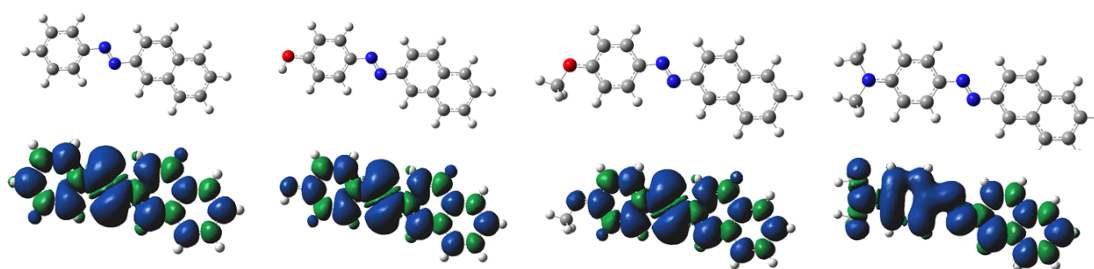

Figure S38. Comparing optimized triplet geometries of azo 1-4 and their spin densities.

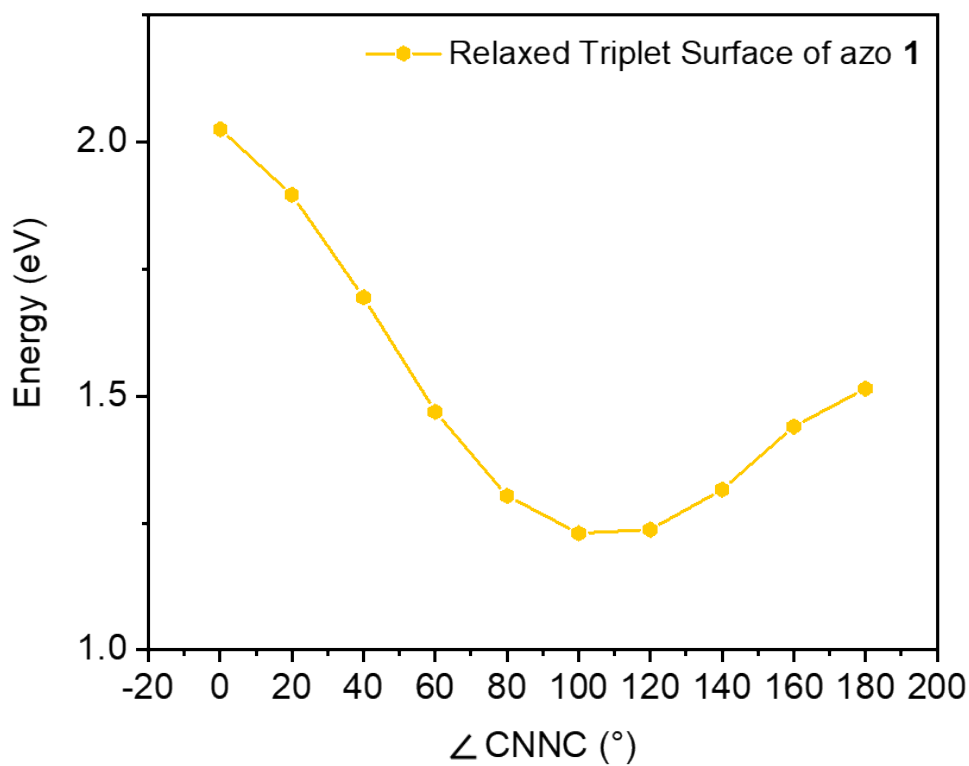

**Figure S39. Triplet potential surface for azo 1 with various  $\angle \text{CNNC}$  dihedral angles.**

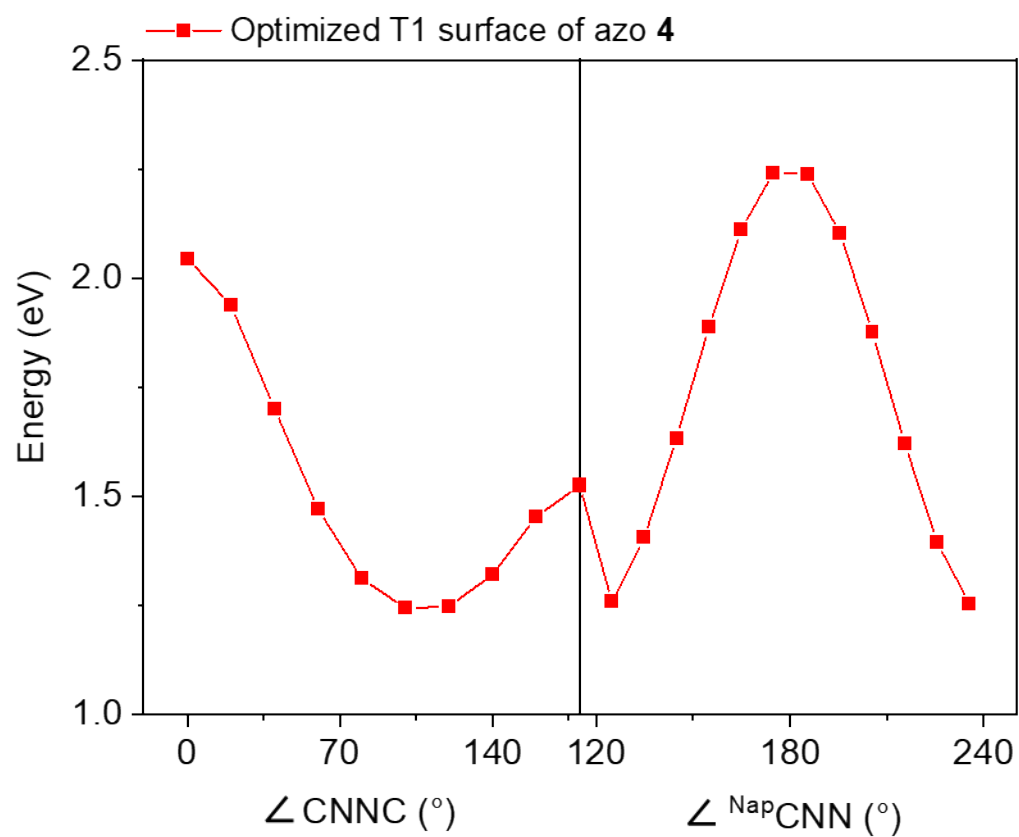

**Figure S40.** Triplet potential surface for azo 4 with various  $\angle\text{CNNC}$  dihedral angles, and  $\angle\text{NapCNN}$  angles.

## DFT Optimized Coordinates

Trans - Nap-azo-ph (azo 1) coordinates (B3LYP/6-311G(d,p)/PCM(ACN))

0 1

C 5.51758740 -0.04340709 -0.00003404  
C 4.58079551 -1.05258151 -0.00000214  
C 3.19636550 -0.75376199 0.00000193  
C 2.78504925 0.61759322 -0.00001719  
C 3.77540906 1.63521482 -0.00004352  
C 5.11195086 1.31131926 -0.00003769  
H 2.51269393 -2.80833483 0.00010176  
H 6.57433965 -0.28476221 -0.00003828  
H 4.89366478 -2.09113031 0.00001853  
C 2.19700862 -1.77035291 0.00007187  
C 1.40045117 0.91352227 -0.00001239  
H 3.46008106 2.67301244 -0.00004409  
H 5.86119362 2.09447884 -0.00003890  
C 0.45517238 -0.09364150 -0.00002950  
C 0.86538072 -1.45820105 0.00005576  
H 1.06443029 1.94423870 -0.00007107  
H 0.10652882 -2.22831221 0.00008670  
N -0.89252667 0.33233652 -0.00005810  
N -1.74693477 -0.58861770 0.00010072  
C -3.09905091 -0.16169887 0.00009203  
C -4.05482965 -1.18440469 -0.00005654  
C -3.51343295 1.17987765 0.00013941  
C -5.41242189 -0.87620084 -0.00012704  
H -3.71190353 -2.21229108 -0.00011162  
C -4.86820743 1.48069798 0.00005532  
H -2.76580293 1.96148327 0.00022187  
C -5.82131424 0.45626925 -0.00008125  
H -6.14775215 -1.67219393 -0.00023809  
H -5.18929029 2.51614805 0.00009843  
H -6.87743386 0.70016745 -0.00013367



Cis - Nap-azo-ph (azo 1) coordinates (B3LYP/6-311G(d,p)/PCM(ACN))

0 1

C -4.55062900 -1.23923900 0.00024900  
C -3.39971000 -1.47802500 -0.71445000  
C -2.29078500 -0.59995200 -0.61465700  
C -2.38729900 0.54466400 0.24002700  
C -3.59127200 0.76518400 0.96121100  
C -4.64685300 -0.10745000 0.84464800  
H -1.02656500 -1.65437400 -2.01985000  
H -5.39150300 -1.91833400 -0.08144800  
H -3.32507900 -2.34356800 -1.36397000  
C -1.08955900 -0.80540400 -1.34769000  
C -1.28657200 1.43143500 0.32339900  
H -3.66307900 1.63366900 1.60697100  
H -5.56050100 0.06844600 1.40077500  
C -0.11297700 1.16876600 -0.35161400  
C -0.02147700 0.04307600 -1.21722100  
H -1.35745100 2.32391500 0.93522800  
H 0.88201900 -0.12506500 -1.78834300  
N 0.90791800 2.17220900 -0.26780700  
N 2.12688800 1.92795600 -0.17280600  
C 2.67257200 0.62516300 0.07632200  
C 3.81681000 0.27399400 -0.64807200  
C 2.22155700 -0.19678600 1.11688900  
C 4.46421000 -0.92822900 -0.38262600  
H 4.17877800 0.94583800 -1.41757800  
C 2.89924800 -1.37859000 1.40082500  
H 1.36419400 0.09669600 1.70908900  
C 4.00900600 -1.75662600 0.64407800  
H 5.33464700 -1.20969400 -0.96377400  
H 2.55721200 -2.00747500 2.21469300  
H 4.52607300 -2.68309500 0.86457300

TS - Nap-azo-ph (azo 1) coordinates (B3LYP/6-311G(d,p)/PCM(ACN))

0 1

C -5.25883569 0.93232232 -0.00484580  
C -4.04478655 1.58125738 -0.00836346  
C -2.83361754 0.84657254 -0.00422442  
C -2.89427163 -0.58440483 0.00293869  
C -4.16165334 -1.22366769 0.00679917  
C -5.31845911 -0.48061249 0.00310448  
H -1.52121534 2.56918360 -0.01075348  
H -6.17886438 1.50534990 -0.00831198  
H -4.00157170 2.66485719 -0.01432270  
C -1.55918671 1.48531840 -0.00658995  
C -1.68179594 -1.31573185 0.00557935  
H -4.20189082 -2.30728015 0.01273669  
H -6.28259937 -0.97544874 0.00632919  
C -0.47041345 -0.66156914 0.00228939  
C -0.40111430 0.75581519 -0.00319380  
H -1.69231871 -2.39997573 0.00995677  
H 0.56560401 1.24388470 -0.00361847  
N 0.68509330 -1.52549417 0.00308871  
N 1.78862510 -1.00062328 0.00152053  
C 2.98935706 -0.42984010 0.00093143  
C 3.65458986 -0.14243679 -1.22328351  
C 3.64453068 -0.11783171 1.22453135  
C 4.91789775 0.43075778 -1.19973111  
H 3.16354515 -0.37489786 -2.15959237  
C 4.90915706 0.45244967 1.20000330  
H 3.14572181 -0.33143801 2.16122667  
C 5.56557541 0.73576555 -0.00013942  
H 5.40444798 0.64185472 -2.14649127  
H 5.38878110 0.68063656 2.14633017  
H 6.55249045 1.18111059 -0.00058797

Triplet - Nap-azo-ph (azo 1) coordinates (B3LYP/6-311G(d,p)/PCM(ACN))

0 3

C 5.18685648 -0.42054324 -0.72052949  
C 4.10105403 -1.26850309 -0.65494069  
C 2.84675914 -0.80307114 -0.19981629  
C 2.71443603 0.56862617 0.19739129  
C 3.85349009 1.41661685 0.11907934  
C 5.05992145 0.93211375 -0.32989005  
H 1.80761210 -2.69330549 -0.40868223  
H 6.14325636 -0.78943945 -1.07253958  
H 4.19814599 -2.30665197 -0.95415636  
C 1.70264914 -1.65371334 -0.11654481  
C 1.46449018 1.03475852 0.65555701  
H 3.75468091 2.45405344 0.41957458  
H 5.92088200 1.58826932 -0.38589732  
C 0.35324244 0.18572214 0.71378639  
C 0.49679818 -1.18801631 0.31985951  
H 1.34830126 2.06776425 0.96259651  
H -0.36381632 -1.84164419 0.38508214  
N -0.82895417 0.71575152 1.14480280  
N -1.89602562 0.00044884 1.32189456  
C -2.97093786 0.07123758 0.47095257  
C -4.11615854 -0.68774310 0.80774319  
C -2.98488392 0.85607518 -0.70793060  
C -5.22897850 -0.67305003 -0.01709457  
H -4.09598082 -1.27838496 1.71578575  
C -4.11022739 0.86389777 -1.51740863  
H -2.11618920 1.45242347 -0.95741596  
C -5.23448101 0.10094701 -1.18313236  
H -6.09992659 -1.26221810 0.24570871  
H -4.11742490 1.46962492 -2.41658649  
H -6.10886196 0.11397798 -1.82284221

Trans-Nap-azo-phOH (azo 2) coordinates

0 1

C 5.96596468 -0.02648278 -0.00025723  
C 5.04643910 0.99834634 -0.00020514  
C 3.65689223 0.72341473 -0.00005277  
C 3.22093889 -0.64032130 0.00005497  
C 4.19417029 -1.67453014 0.00001171  
C 5.53623031 -1.37383033 -0.00014133  
H 3.00794672 2.78906668 -0.00013320  
H 7.02676345 0.19648474 -0.00038304  
H 5.37676428 2.03155088 -0.00027502  
C 2.67500018 1.75638254 -0.00001096  
C 1.83120663 -0.91234942 0.00021419  
H 3.86123320 -2.70688921 0.00011753  
H 6.27152517 -2.17020530 -0.00016742  
C 0.90213567 0.10990619 0.00023912  
C 1.33804729 1.46669300 0.00008089  
H 1.47837924 -1.93751811 0.00026963  
H 0.59307490 2.25028445 0.00001291  
N -0.45355360 -0.29042755 0.00024158  
N -1.28949218 0.65084715 0.00028715  
C -2.64487625 0.26625379 0.00009856  
C -3.58012573 1.31145001 0.00015679  
C -3.10610059 -1.06113200 0.00003423  
C -4.94109246 1.05027463 -0.00015219  
H -3.21442386 2.33140161 0.00026908  
C -4.46357924 -1.33020022 -0.00000748  
H -2.38583349 -1.86809058 0.00015572  
C -5.39018226 -0.27478323 -0.00000681  
H -5.66797417 1.85310684 -0.00034931  
H -4.81619665 -2.35661188 -0.00005668  
O -6.73176983 -0.48045512 -0.00045790  
H -6.92219194 -1.42642725 0.00016262

Cis-Nap-azo-phOH (azo 2) coordinates

0 1

C 4.72733159 -1.51072065 0.12273273  
C 3.61529494 -1.48490397 0.93214848  
C 2.58336841 -0.53659084 0.71556916  
C 2.71703693 0.40174176 -0.35775071  
C 3.87965722 0.35105328 -1.17260650  
C 4.85993200 -0.58398378 -0.93856722  
H 1.33378315 -1.16220097 2.36923717  
H 5.50884444 -2.24162007 0.29588898  
H 3.51310371 -2.19281907 1.74777186  
C 1.42424030 -0.47223739 1.53711710  
C 1.69442865 1.36108837 -0.56195612  
H 3.98114166 1.06212426 -1.98539523  
H 5.74177302 -0.61480440 -1.56827074  
C 0.55634595 1.35830837 0.21596435  
C 0.42965028 0.43837351 1.29458532  
H 1.79889680 2.10144903 -1.34755278  
H -0.44499051 0.47751383 1.93138218  
N -0.37967995 2.42628446 0.02158582  
N -1.62039643 2.27939490 -0.01213165  
C -2.29028604 1.02140051 -0.08861054  
C -3.54161374 0.96252874 0.53731715  
C -1.86965921 -0.06523006 -0.87357896  
C -4.32542330 -0.17969509 0.45711737  
H -3.88412737 1.82419465 1.09796376  
C -2.66877496 -1.19042993 -0.99398218  
H -0.93343605 -0.02059931 -1.41321659  
C -3.89124509 -1.26405933 -0.31360037  
H -5.28074017 -0.22396579 0.96916986  
H -2.36304350 -2.02470425 -1.61363855  
O -4.61673234 -2.40338616 -0.45803019  
H -5.43851535 -2.33709509 0.04332804

TS-Nap-azo-phOH (azo 2) coordinates

0 1

C -5.65481195 1.02974757 -0.23139237  
C -4.41666900 1.62247003 -0.33326254  
C -3.23386856 0.85794798 -0.17714398  
C -3.34743164 -0.54491498 0.08920150  
C -4.63908741 -1.12599092 0.18861879  
C -5.76711215 -0.35549577 0.03163712  
H -1.85584509 2.50076205 -0.47838287  
H -6.55246569 1.62500189 -0.35300972  
H -4.33186286 2.68481260 -0.53502586  
C -1.93595135 1.43785477 -0.27693439  
C -2.16290868 -1.30595355 0.24435417  
H -4.72112640 -2.18840454 0.39054640  
H -6.74914410 -0.80756318 0.10903265  
C -0.92503086 -0.71083811 0.14429736  
C -0.80716288 0.67866233 -0.12209340  
H -2.21570475 -2.37097963 0.44258472  
H 0.17778319 1.12208105 -0.20006846  
N 0.20036606 -1.60181454 0.30414482  
N 1.32692521 -1.11187588 0.20424463  
C 2.55337477 -0.59013847 0.11545032  
C 3.49502518 -1.09959229 -0.81716856  
C 2.96626946 0.47442625 0.96306044  
C 4.75678031 -0.53282499 -0.92659920  
H 3.20276800 -1.91314320 -1.46899693  
C 4.26280934 0.95931556 0.90438369  
H 2.26608118 0.87710385 1.68413757  
C 5.16208512 0.48222199 -0.05449081  
H 5.44643952 -0.91048237 -1.67520641  
H 4.58286033 1.74403139 1.58025610  
O 6.41135856 1.04271191 -0.08961263  
H 6.93045086 0.62953326 -0.78920114

Trans-Nap-azo-phOMe (azo 3) coordinates

0 1

C -6.39763430 -0.10423931 0.09823658  
C -5.49925225 0.93912324 0.11271898  
C -4.10508356 0.69323322 0.06932467  
C -3.64273649 -0.66047744 0.01003740  
C -4.59441374 -1.71434811 -0.00290432  
C -5.94167248 -1.44166027 0.04001506  
H -3.49832409 2.77096392 0.12707486  
H -7.46233935 0.09644087 0.13151616  
H -5.85000358 1.96452788 0.15734343  
C -3.14449900 1.74633550 0.08165896  
C -2.24855940 -0.90339656 -0.03528629  
H -4.24079044 -2.73876341 -0.04780965  
H -6.66101169 -2.25235398 0.02927161  
C -1.34142091 0.13822483 -0.02347020  
C -1.80262275 1.48517086 0.03694169  
H -1.87502572 -1.92008864 -0.08155382  
H -1.07345001 2.28345422 0.04527220  
N 0.02068803 -0.23516887 -0.07716454  
N 0.83939852 0.71857866 -0.06897728  
C 2.20378214 0.34933536 -0.12682138  
C 3.11958558 1.40868781 -0.12271739  
C 2.67475056 -0.97257631 -0.19420362  
C 4.48614263 1.16179533 -0.18146964  
H 2.73837064 2.42184047 -0.07604066  
C 4.03674171 -1.22002575 -0.25254966  
H 1.96156356 -1.78572259 -0.20286986  
C 4.94572953 -0.15390451 -0.24958415  
H 5.20094288 1.97588932 -0.18947720  
H 4.41574060 -2.23349622 -0.31530355  
O 6.29232750 -0.40644212 -0.36710276  
C 6.99090973 -0.56600283 0.87821563  
H 8.03247052 -0.75653488 0.62413034  
H 6.92245986 0.34284833 1.48432069  
H 6.59168926 -1.41298729 1.44508652

Cis-Nap-azo-phOMe (azo 3) coordinates

0 1

C 4.94415238 -1.80966167 0.10627280  
C 3.83215480 -1.70477876 0.90934418  
C 2.88797143 -0.66599617 0.70733290  
C 3.11084268 0.27946650 -0.34474634  
C 4.27091327 0.14531804 -1.15365018  
C 5.16478937 -0.87576948 -0.93398486  
H 1.57642112 -1.21507592 2.33965941  
H 5.65798542 -2.60917168 0.26814710  
H 3.66250506 -2.41793234 1.70902880  
C 1.73271435 -0.51784300 1.52345344  
C 2.17768163 1.32868122 -0.53360055  
H 4.43960312 0.86225571 -1.94997532  
H 6.04571778 -0.96958449 -1.55869697  
C 1.03810411 1.40994323 0.23806273  
C 0.82351033 0.48170563 1.29569291  
H 2.35292603 2.07359966 -1.30209195  
H -0.04874562 0.58443558 1.92869121  
N 0.20427236 2.56208061 0.06260923  
N -1.04472595 2.53123988 0.01850929  
C -1.82905823 1.34460790 -0.08973579  
C -3.09010705 1.39878970 0.51145965  
C -1.50044941 0.22772164 -0.87990563  
C -3.98440691 0.33906095 0.41029344  
H -3.35848659 2.28532967 1.07394077  
C -2.40176768 -0.81069635 -1.02219104  
H -0.55550641 0.18602028 -1.40421655  
C -3.64241268 -0.77781724 -0.36260036  
H -4.94044706 0.40161320 0.91087704  
H -2.16985776 -1.66689860 -1.64397894  
O -4.43878362 -1.85757041 -0.55182931  
C -5.72158777 -1.88670727 0.08156993  
H -6.16710813 -2.83752433 -0.20213666  
H -5.62536503 -1.83852250 1.16981086  
H -6.35446577 -1.06737354 -0.27065726



TS-Nap-azo-phOMe (azo 3) coordinates

0 1

C 6.09670760 1.05696766 0.00044997  
C 4.86024320 1.66218318 -0.00025544  
C 3.67601154 0.88480701 -0.00039111  
C 3.78773088 -0.54313276 0.00022083  
C 5.07715869 -1.13676868 0.00092218  
C 6.20675192 -0.35293244 0.00103899  
H 2.30298319 2.55958291 -0.00160040  
H 6.99567783 1.66251843 0.00056608  
H 4.77851042 2.74358276 -0.00069006  
C 2.37955830 1.47773583 -0.00110115  
C 2.60204490 -1.31720579 0.00011727  
H 5.15609209 -2.21828393 0.00135997  
H 7.18795316 -0.81300346 0.00157926  
C 1.36807000 -0.70672628 -0.00048876  
C 1.24833384 0.70728247 -0.00113716  
H 2.65112694 -2.40041679 0.00054879  
H 0.26450990 1.15980175 -0.00168057  
N 0.24340729 -1.61117911 -0.00037709  
N -0.87784707 -1.12395948 -0.00045700  
C -2.10298047 -0.60123197 -0.00029746  
C -2.77296771 -0.32336670 1.22180027  
C -2.77381971 -0.32446945 -1.22217581  
C -4.05805603 0.20088539 1.20201376  
H -2.27073448 -0.52108993 2.15997122  
C -4.05885977 0.19988665 -1.20196446  
H -2.27225431 -0.52306619 -2.16052014  
C -4.71346630 0.46992285 0.00013069  
H -4.55901867 0.41882153 2.13913629  
H -4.56046318 0.41703377 -2.13892694  
O -5.97760044 1.04284484 0.00030577  
C -7.05379493 0.09865126 0.00108504  
H -7.97890313 0.67567693 0.00095556  
H -7.02299142 -0.53695015 -0.89096375  
H -7.02260221 -0.53592561 0.89385132

Trans-Nap-azo-phNMe<sub>2</sub> (azo 4) coordinates

0 1

C 6.81344850 -0.09875777 -0.00002394  
C 5.91087585 0.94099069 0.00012384  
C 4.51663663 0.68983687 0.00009307  
C 4.05590883 -0.66584692 -0.00009316  
C 5.01256523 -1.71597841 -0.00023951  
C 6.35968663 -1.43842449 -0.00020554  
H 3.90160484 2.76563007 0.00038441  
H 7.87797601 0.10585605 -0.00000093  
H 6.25817106 1.96877524 0.00026622  
C 3.55180711 1.73832527 0.00024122  
C 2.66168252 -0.91418873 -0.00013100  
H 4.66242397 -2.74276034 -0.00037798  
H 7.08094342 -2.24771166 -0.00031734  
C 1.74688978 0.12203013 0.00000539  
C 2.20999902 1.47083269 0.00020493  
H 2.29285809 -1.93389021 -0.00027627  
H 1.47884318 2.26741595 0.00032163  
N 0.38512327 -0.25160715 -0.00003800  
N -0.43227929 0.71328851 0.00010039  
C -1.78786274 0.37655753 0.00007156  
C -2.69862095 1.44548213 0.00005326  
C -2.30570889 -0.93411151 0.00009679  
C -4.06411682 1.23511128 -0.00003452  
H -2.30416433 2.45538963 0.00018504  
C -3.66462118 -1.16140020 0.00000906  
H -1.61610144 -1.76804624 0.00019830  
C -4.59522728 -0.08173674 -0.00019784  
H -4.72477271 2.08997373 0.00016887  
H -4.02144412 -2.18170445 0.00003577  
N -5.94192373 -0.30758371 -0.00065606  
C -6.87648102 0.81226986 -0.00048863  
H -7.89274413 0.42569804 -0.00254262  
H -6.75249956 1.44089006 0.88795014  
H -6.74987785 1.44298200 -0.88700971  
C -6.46678665 -1.66896703 0.00079082  
H -7.55336238 -1.62850594 0.00118721  
H -6.14773923 -2.22621204 -0.88647642  
H -6.14700368 -2.22461136 0.88880451

Cis-Nap-azo-phNMe<sub>2</sub> (azo 4) coordinates

0 1

C -5.08924856 1.96245240 0.26741065  
C -4.05001318 1.63946720 1.10924298  
C -3.16103212 0.58138880 0.79164402  
C -3.36084853 -0.15438908 -0.42039977  
C -4.44591218 0.20162409 -1.26578843  
C -5.28806454 1.23569109 -0.93036155  
H -1.94334734 0.74987472 2.57391580  
H -5.76114345 2.77505043 0.51892659  
H -3.89631873 2.19341290 2.02939558  
C -2.08193256 0.21218173 1.64180593  
C -2.47971712 -1.22068450 -0.73128660  
H -4.59870207 -0.35608612 -2.18367031  
H -6.11111816 1.49870181 -1.58519895  
C -1.41152860 -1.52014201 0.08764713  
C -1.22437953 -0.80087211 1.30292509  
H -2.64002372 -1.80505306 -1.63093038  
H -0.40892017 -1.07353270 1.96149017  
N -0.63589066 -2.68593817 -0.20382779  
N 0.61981802 -2.72084386 -0.20798849  
C 1.47870107 -1.59909178 -0.16415134  
C 2.77916052 -1.86821671 0.29701111  
C 1.21816870 -0.31013077 -0.66992801  
C 3.75353263 -0.89130910 0.34464051  
H 3.00322093 -2.87459268 0.63211162  
C 2.19650760 0.66457585 -0.67055584  
H 0.25587670 -0.07600189 -1.10316537  
C 3.48877805 0.42070008 -0.12976151  
H 4.73040968 -1.14661681 0.72924742  
H 1.96186160 1.62850079 -1.09908900  
N 4.43951419 1.40128860 -0.08755780  
C 5.78404883 1.10282629 0.39260926  
H 6.36901645 2.01957478 0.39840862  
H 5.76233410 0.71039002 1.41376827  
H 6.29573535 0.37253242 -0.24555721  
C 4.17400086 2.71415834 -0.66540031  
H 5.02980958 3.35988207 -0.48288487  
H 4.00910625 2.66102778 -1.74819208  
H 3.29678400 3.18001053 -0.20677726

TS-Nap-azo-phNMe<sub>2</sub> (azo 4) coordinates

0 1

C -6.26901152 1.18513863 0.05667436  
C -5.50989194 0.56899855 1.02820132  
C -4.22588738 0.05266695 0.73500751  
C -3.69885076 0.16909599 -0.59515684  
C -4.51064919 0.81222360 -1.57563971  
C -5.75551269 1.30348646 -1.25675289  
H -3.79985236 -0.68600459 2.72673976  
H -7.25172056 1.57703466 0.29209506  
H -5.89043669 0.47030688 2.04045519  
C -3.41700915 -0.58886599 1.71541983  
C -2.41952394 -0.33977526 -0.89977852  
H -4.12864260 0.90961642 -2.58692770  
H -6.35299852 1.78853027 -2.02164086  
C -1.64108828 -0.97145116 0.08826239  
C -2.17913047 -1.08586208 1.42489766  
H -2.02822477 -0.24632749 -1.90562868  
H -1.57923782 -1.57183876 2.18435494  
N -0.44998741 -1.48382085 -0.16683929  
N 0.65741350 -1.96016327 -0.40399533  
C 1.80396134 -1.14586279 -0.25110362  
C 3.03153090 -1.75476297 -0.54566530  
C 1.79249205 0.19595177 0.16745892  
C 4.21848005 -1.06011258 -0.43180157  
H 3.02901780 -2.79033138 -0.86647116  
C 2.96773527 0.90267723 0.28701612  
H 0.84936893 0.67732191 0.39876460  
C 4.22580236 0.29789089 -0.01055446  
H 5.14521153 -1.56320599 -0.66591114  
H 2.92672033 1.93253127 0.61131766  
N 5.38722643 0.99893240 0.10607650  
C 6.66661319 0.36333276 -0.19532490  
H 7.46299378 1.09169457 -0.06464563  
H 6.86338399 -0.48295081 0.47152611  
H 6.70027087 0.00328355 -1.22849914  
C 5.37637560 2.38625022 0.56255089  
H 6.39772029 2.75774335 0.58450837  
H 4.79603317 3.02593578 -0.10995400  
H 4.95921197 2.47590117 1.57095624

Triplet-Nap-azo-phNMe<sub>2</sub> (azo 4) coordinates

0 3

C -6.20356039 0.92480137 0.87568900  
C -5.13471317 0.38693198 1.56175860  
C -3.95697856 0.00268684 0.88136218  
C -3.88413170 0.17666696 -0.54059323  
C -5.00410345 0.73328109 -1.21835421  
C -6.13520720 1.09828039 -0.52582503  
H -2.89330291 -0.69943830 2.63343883  
H -7.10058939 1.21683053 1.40942532  
H -5.18605282 0.25267344 2.63712952  
C -2.83301623 -0.56037553 1.55886883  
C -2.71144552 -0.21158172 -1.22192867  
H -4.95109241 0.86549742 -2.29371281  
H -6.98151805 1.52193784 -1.05449396  
C -1.61430425 -0.74870494 -0.53693701  
C -1.70205525 -0.92321849 0.88673784  
H -2.64265692 -0.09040643 -2.29714942  
H -0.85869735 -1.35620055 1.40944666  
N -0.51041773 -1.07884097 -1.27383315  
N 0.51618735 -1.65897836 -0.69318486  
C 1.68482269 -1.00632515 -0.47855409  
C 2.78644157 -1.74308052 0.03262796  
C 1.88660546 0.37868984 -0.72862574  
C 3.99660152 -1.14247531 0.29139760  
H 2.65207566 -2.80178765 0.22258971  
C 3.10071972 0.97989642 -0.47838628  
H 1.07000739 0.96223731 -1.13582565  
C 4.19989110 0.24576794 0.04726972  
H 4.80212704 -1.74695049 0.68389575  
H 3.20930560 2.03338260 -0.69590884  
N 5.40352435 0.84658502 0.30075237  
C 6.52747974 0.06662168 0.80559517  
H 7.38331154 0.72404281 0.93906348  
H 6.29726282 -0.39162482 1.77327613  
H 6.81428031 -0.72879873 0.10883929  
C 5.59169317 2.26662657 0.02840054  
H 6.60129679 2.55160049 0.31431347  
H 5.46042149 2.49667762 -1.03495652  
H 4.89032823 2.88203067 0.60146951

**Table S1. 30 TDDFT singlet excitations of azo 1 from *trans*-S0 geometry, B3LYP/6-311G(d,p)/PCM(ACN)**

| Excited States | Energy (eV) | Wavelength (nm) | Oscillator Strength | Transition | Transition Contribution |
|----------------|-------------|-----------------|---------------------|------------|-------------------------|
| 1              | 2.5901      | 478.68          | f=0.0000            | 60 -> 62   | 0.70161                 |
| 2              | 3.1998      | 387.48          | f=0.5450            | 59 -> 62   | -0.17545                |
|                |             |                 |                     | 61 -> 62   | 0.67419                 |
| 3              | 3.5612      | 348.15          | f=0.6421            | 59 -> 62   | 0.66837                 |
|                |             |                 |                     | 61 -> 62   | 0.19249                 |
|                |             |                 |                     | 61 -> 63   | -0.10188                |
| 4              | 4.0233      | 308.17          | f=0.0225            | 58 -> 62   | 0.68872                 |
|                |             |                 |                     | 61 -> 64   | 0.10087                 |
| 5              | 4.3160      | 287.27          | f=0.1460            | 57 -> 62   | 0.31520                 |
|                |             |                 |                     | 59 -> 62   | 0.12979                 |
|                |             |                 |                     | 61 -> 63   | 0.59471                 |
| 6              | 4.4150      | 280.83          | f=0.0000            | 60 -> 63   | 0.69938                 |
| 7              | 4.4899      | 276.14          | f=0.0263            | 57 -> 62   | 0.58613                 |
|                |             |                 |                     | 59 -> 63   | -0.19509                |
|                |             |                 |                     | 59 -> 65   | 0.10353                 |
|                |             |                 |                     | 61 -> 63   | -0.30360                |
| 8              | 4.7893      | 258.88          | f=0.1378            | 57 -> 63   | -0.11036                |
|                |             |                 |                     | 59 -> 63   | 0.52583                 |
|                |             |                 |                     | 61 -> 63   | -0.12554                |
|                |             |                 |                     | 61 -> 64   | 0.22988                 |
|                |             |                 |                     | 61 -> 65   | 0.34671                 |
| 9              | 5.0218      | 246.89          | f=0.0009            | 56 -> 62   | 0.68063                 |
|                |             |                 |                     | 61 -> 66   | 0.12586                 |
| 10             | 5.1453      | 240.96          | f=0.0000            | 60 -> 64   | 0.69933                 |
| 11             | 5.2176      | 237.63          | f=0.1489            | 58 -> 62   | -0.12092                |
|                |             |                 |                     | 58 -> 65   | -0.12109                |
|                |             |                 |                     | 59 -> 63   | -0.13663                |
|                |             |                 |                     | 61 -> 64   | 0.61361                 |
|                |             |                 |                     | 61 -> 65   | -0.21373                |
| 12             | 5.2829      | 234.69          | f=0.0004            | 60 -> 65   | 0.69145                 |
| 13             | 5.3982      | 229.68          | f=0.0960            | 57 -> 63   | 0.45781                 |
|                |             |                 |                     | 58 -> 63   | 0.20645                 |
|                |             |                 |                     | 59 -> 63   | 0.29490                 |
|                |             |                 |                     | 59 -> 65   | 0.17799                 |
|                |             |                 |                     | 61 -> 65   | -0.28148                |
| 14             | 5.5258      | 224.38          | f=0.0002            | 57 -> 63   | -0.16450                |

|    |        |        |          |          |          |
|----|--------|--------|----------|----------|----------|
| 15 | 5.6795 | 218.30 | f=0.0898 | 58 -> 63 | 0.65463  |
|    |        |        |          | 61 -> 65 | 0.10134  |
|    |        |        |          | 57 -> 63 | 0.14496  |
|    |        |        |          | 58 -> 63 | -0.10939 |
|    |        |        |          | 58 -> 65 | -0.16572 |
|    |        |        |          | 59 -> 64 | 0.58597  |
| 16 | 5.8269 | 212.78 | f=0.2539 | 61 -> 65 | 0.24149  |
|    |        |        |          | 55 -> 62 | -0.12571 |
|    |        |        |          | 57 -> 62 | -0.13664 |
|    |        |        |          | 57 -> 63 | 0.24002  |
|    |        |        |          | 58 -> 64 | 0.19793  |
|    |        |        |          | 59 -> 63 | -0.17554 |
|    |        |        |          | 59 -> 64 | -0.18603 |
|    |        |        |          | 59 -> 65 | 0.34974  |
|    |        |        |          | 61 -> 64 | 0.16961  |
|    |        |        |          | 61 -> 65 | 0.34156  |
| 17 | 5.8522 | 211.86 | f=0.0377 | 56 -> 63 | -0.34842 |
|    |        |        |          | 59 -> 66 | -0.13786 |
|    |        |        |          | 61 -> 66 | 0.55971  |
| 18 | 5.8846 | 210.69 | f=0.0003 | 54 -> 62 | 0.68102  |
| 19 | 5.9417 | 208.67 | f=0.0660 | 55 -> 62 | 0.61904  |
|    |        |        |          | 57 -> 63 | -0.11458 |
|    |        |        |          | 59 -> 65 | 0.16824  |
|    |        |        |          | 61 -> 67 | -0.22536 |
| 20 | 6.0069 | 206.40 | f=0.0002 | 52 -> 62 | 0.10534  |
|    |        |        |          | 53 -> 62 | 0.56734  |
|    |        |        |          | 60 -> 66 | 0.15063  |
|    |        |        |          | 60 -> 67 | -0.35224 |
| 21 | 6.0241 | 205.81 | f=0.3113 | 55 -> 62 | -0.12852 |
|    |        |        |          | 57 -> 63 | -0.33910 |
|    |        |        |          | 59 -> 64 | 0.16042  |
|    |        |        |          | 59 -> 65 | 0.49103  |
|    |        |        |          | 61 -> 65 | -0.14338 |
|    |        |        |          | 61 -> 67 | 0.19245  |
| 22 | 6.1157 | 202.73 | f=0.0004 | 53 -> 62 | 0.38110  |
|    |        |        |          | 60 -> 66 | -0.31072 |
|    |        |        |          | 60 -> 67 | 0.49031  |
| 23 | 6.2065 | 199.77 | f=0.0140 | 56 -> 63 | 0.25239  |
|    |        |        |          | 56 -> 65 | 0.12537  |
|    |        |        |          | 57 -> 64 | -0.26394 |
|    |        |        |          | 58 -> 65 | 0.23043  |
|    |        |        |          | 59 -> 64 | 0.14008  |
|    |        |        |          | 59 -> 66 | 0.38133  |

|    |        |        |          |          |          |
|----|--------|--------|----------|----------|----------|
|    |        |        |          | 61 -> 66 | 0.21772  |
|    |        |        |          | 61 -> 67 | 0.20768  |
| 24 | 6.2124 | 199.57 | f=0.0000 | 60 -> 66 | 0.60518  |
|    |        |        |          | 60 -> 67 | 0.34070  |
| 25 | 6.2460 | 198.50 | f=0.0047 | 56 -> 63 | -0.21873 |
|    |        |        |          | 57 -> 64 | -0.34110 |
|    |        |        |          | 57 -> 65 | 0.12020  |
|    |        |        |          | 58 -> 65 | 0.35161  |
|    |        |        |          | 59 -> 64 | 0.16781  |
|    |        |        |          | 59 -> 65 | -0.10076 |
|    |        |        |          | 59 -> 66 | -0.27248 |
|    |        |        |          | 61 -> 66 | -0.19361 |
| 26 | 6.3136 | 196.38 | f=0.0000 | 51 -> 62 | 0.14837  |
|    |        |        |          | 52 -> 62 | 0.65799  |
|    |        |        |          | 53 -> 62 | -0.12321 |
| 27 | 6.3306 | 195.85 | f=0.0676 | 55 -> 62 | 0.18356  |
|    |        |        |          | 57 -> 63 | 0.13722  |
|    |        |        |          | 57 -> 64 | 0.21576  |
|    |        |        |          | 58 -> 64 | -0.25393 |
|    |        |        |          | 61 -> 66 | -0.13031 |
|    |        |        |          | 61 -> 67 | 0.51742  |
| 28 | 6.4144 | 193.29 | f=0.0002 | 48 -> 62 | 0.11374  |
|    |        |        |          | 51 -> 62 | 0.66040  |
|    |        |        |          | 52 -> 62 | -0.16221 |
| 29 | 6.5264 | 189.97 | f=0.1340 | 50 -> 62 | 0.12980  |
|    |        |        |          | 56 -> 63 | -0.19765 |
|    |        |        |          | 57 -> 64 | 0.10390  |
|    |        |        |          | 57 -> 65 | 0.23058  |
|    |        |        |          | 58 -> 64 | 0.49302  |
|    |        |        |          | 59 -> 65 | -0.10975 |
|    |        |        |          | 59 -> 66 | 0.15473  |
|    |        |        |          | 59 -> 67 | -0.14984 |
|    |        |        |          | 61 -> 66 | -0.14182 |
|    |        |        |          | 61 -> 67 | 0.12760  |
| 30 | 6.5447 | 189.44 | f=0.0130 | 56 -> 63 | 0.40684  |
|    |        |        |          | 57 -> 64 | 0.19405  |
|    |        |        |          | 57 -> 65 | 0.30939  |
|    |        |        |          | 58 -> 64 | 0.10494  |
|    |        |        |          | 58 -> 65 | 0.11217  |
|    |        |        |          | 59 -> 66 | -0.33946 |
|    |        |        |          | 61 -> 66 | 0.15080  |



**Table S2. 30 TDDFT triplet excitations of azo 1 from *trans*-S<sub>0</sub> geometry, B3LYP/6-311G(d,p)/PCM(ACN)**

| Excited States | Energy (eV) | Wavelength (nm) | Oscillator Strength | Transition | Transition Contribution |
|----------------|-------------|-----------------|---------------------|------------|-------------------------|
| 1              | 1.8577      | 667.41          | f=0.0000            | 60 -> 62   | 0.68555                 |
|                |             |                 |                     | 60 -> 67   | -0.14866                |
| 2              | 2.0660      | 600.13          | f=0.0000            | 59 -> 62   | 0.23927                 |
|                |             |                 |                     | 59 -> 63   | 0.10098                 |
|                |             |                 |                     | 61 -> 62   | 0.62761                 |
|                |             |                 |                     | 61 -> 63   | -0.11905                |
| 3              | 2.8976      | 427.89          | f=0.0000            | 57 -> 62   | 0.19759                 |
|                |             |                 |                     | 59 -> 62   | 0.52136                 |
|                |             |                 |                     | 59 -> 63   | -0.11289                |
|                |             |                 |                     | 61 -> 62   | -0.14934                |
|                |             |                 |                     | 61 -> 63   | 0.33740                 |
|                |             |                 |                     | 61 -> 65   | -0.10936                |
| 4              | 3.1415      | 394.66          | f=0.0000            | 57 -> 62   | 0.11033                 |
|                |             |                 |                     | 59 -> 62   | -0.33778                |
|                |             |                 |                     | 59 -> 63   | -0.27860                |
|                |             |                 |                     | 59 -> 65   | -0.10987                |
|                |             |                 |                     | 61 -> 62   | 0.25198                 |
|                |             |                 |                     | 61 -> 63   | 0.44158                 |
| 5              | 3.5253      | 351.69          | f=0.0000            | 57 -> 62   | 0.20176                 |
|                |             |                 |                     | 58 -> 62   | 0.61071                 |
|                |             |                 |                     | 58 -> 64   | -0.14768                |
|                |             |                 |                     | 59 -> 62   | -0.10879                |
|                |             |                 |                     | 59 -> 63   | 0.10197                 |
| 6              | 3.6224      | 342.27          | f=0.0000            | 57 -> 62   | 0.53689                 |
|                |             |                 |                     | 58 -> 62   | -0.29592                |
|                |             |                 |                     | 59 -> 62   | -0.13608                |
|                |             |                 |                     | 59 -> 63   | 0.15767                 |
|                |             |                 |                     | 59 -> 65   | -0.11299                |
|                |             |                 |                     | 61 -> 63   | -0.12585                |
| 7              | 4.0159      | 308.73          | f=0.0000            | 61 -> 65   | -0.13983                |
|                |             |                 |                     | 57 -> 63   | -0.22003                |
|                |             |                 |                     | 59 -> 63   | 0.54899                 |
| 8              | 4.1405      | 299.44          | f=0.0000            | 61 -> 63   | 0.34467                 |
|                |             |                 |                     | 55 -> 62   | 0.13713                 |
|                |             |                 |                     | 56 -> 62   | 0.38372                 |
|                |             |                 |                     | 56 -> 63   | -0.28159                |
|                |             |                 |                     | 57 -> 62   | -0.10821                |
|                |             |                 |                     | 57 -> 63   | 0.11510                 |

|    |        |        |          |          |          |
|----|--------|--------|----------|----------|----------|
| 9  | 4.3430 | 285.48 | f=0.0000 | 57 -> 65 | -0.12395 |
|    |        |        |          | 58 -> 64 | -0.19114 |
|    |        |        |          | 61 -> 66 | -0.33606 |
|    |        |        |          | 56 -> 62 | 0.14910  |
|    |        |        |          | 56 -> 63 | -0.12898 |
|    |        |        |          | 57 -> 62 | 0.20621  |
|    |        |        |          | 58 -> 64 | 0.52099  |
|    |        |        |          | 58 -> 65 | -0.22008 |
|    |        |        |          | 61 -> 65 | 0.15582  |
| 10 | 4.3572 | 284.55 | f=0.0000 | 61 -> 66 | -0.12670 |
| 11 | 4.5992 | 269.58 | f=0.0000 | 60 -> 63 | 0.68872  |
|    |        |        |          | 56 -> 63 | 0.12203  |
|    |        |        |          | 57 -> 62 | 0.12864  |
|    |        |        |          | 57 -> 65 | -0.14080 |
|    |        |        |          | 59 -> 64 | 0.16234  |
|    |        |        |          | 61 -> 64 | 0.50461  |
|    |        |        |          | 61 -> 65 | 0.32004  |
|    |        |        |          | 61 -> 67 | 0.14374  |
| 12 | 4.6838 | 264.71 | f=0.0000 | 56 -> 63 | 0.11845  |
|    |        |        |          | 57 -> 64 | -0.21853 |
|    |        |        |          | 58 -> 64 | -0.15746 |
|    |        |        |          | 59 -> 64 | -0.27260 |
|    |        |        |          | 59 -> 65 | 0.11823  |
|    |        |        |          | 61 -> 64 | -0.25594 |
|    |        |        |          | 61 -> 65 | 0.45598  |
|    |        |        |          | 61 -> 67 | 0.11188  |
| 13 | 4.7505 | 260.99 | f=0.0000 | 55 -> 62 | 0.11470  |
|    |        |        |          | 56 -> 62 | 0.42748  |
|    |        |        |          | 56 -> 63 | 0.27832  |
|    |        |        |          | 57 -> 62 | -0.12061 |
|    |        |        |          | 58 -> 64 | 0.13397  |
|    |        |        |          | 59 -> 66 | -0.19495 |
|    |        |        |          | 61 -> 65 | -0.16782 |
|    |        |        |          | 61 -> 66 | 0.22035  |
|    |        |        |          | 61 -> 67 | 0.16242  |
| 14 | 4.9155 | 252.23 | f=0.0000 | 42 -> 62 | 0.12563  |
|    |        |        |          | 50 -> 62 | -0.14527 |
|    |        |        |          | 55 -> 62 | 0.35088  |
|    |        |        |          | 56 -> 62 | -0.18585 |
|    |        |        |          | 57 -> 64 | -0.13128 |
|    |        |        |          | 57 -> 65 | -0.18643 |
|    |        |        |          | 59 -> 64 | 0.13474  |
|    |        |        |          | 59 -> 65 | 0.24395  |

|    |        |        |          |          |          |
|----|--------|--------|----------|----------|----------|
| 15 | 5.0575 | 245.15 | f=0.0000 | 59 -> 67 | 0.26373  |
|    |        |        |          | 61 -> 64 | -0.10133 |
|    |        |        |          | 61 -> 65 | -0.10907 |
|    |        |        |          | 61 -> 67 | 0.16600  |
|    |        |        |          | 55 -> 62 | -0.13063 |
|    |        |        |          | 56 -> 62 | 0.27744  |
|    |        |        |          | 57 -> 62 | 0.11155  |
|    |        |        |          | 57 -> 63 | -0.19792 |
|    |        |        |          | 57 -> 67 | -0.12220 |
|    |        |        |          | 58 -> 64 | -0.11869 |
|    |        |        |          | 59 -> 63 | -0.15828 |
|    |        |        |          | 59 -> 64 | 0.23175  |
|    |        |        |          | 59 -> 65 | 0.42284  |
|    |        |        |          | 61 -> 67 | -0.17086 |
| 16 | 5.1141 | 242.43 | f=0.0000 | 60 -> 64 | 0.70185  |
| 17 | 5.1812 | 239.30 | f=0.0000 | 60 -> 65 | 0.68649  |
| 18 | 5.2797 | 234.83 | f=0.0000 | 55 -> 63 | -0.19697 |
|    |        |        |          | 57 -> 63 | 0.51429  |
|    |        |        |          | 57 -> 66 | 0.10019  |
|    |        |        |          | 59 -> 64 | 0.14933  |
|    |        |        |          | 59 -> 65 | 0.21458  |
|    |        |        |          | 59 -> 66 | -0.18799 |
|    |        |        |          | 61 -> 63 | 0.10275  |
| 19 | 5.4870 | 225.96 | f=0.0000 | 58 -> 63 | 0.59834  |
|    |        |        |          | 58 -> 65 | -0.15453 |
|    |        |        |          | 59 -> 64 | -0.12111 |
|    |        |        |          | 61 -> 64 | 0.15677  |
|    |        |        |          | 61 -> 66 | 0.11469  |
| 20 | 5.5329 | 224.09 | f=0.0000 | 56 -> 63 | 0.15555  |
|    |        |        |          | 57 -> 63 | -0.21043 |
|    |        |        |          | 57 -> 64 | 0.10006  |
|    |        |        |          | 57 -> 65 | -0.11229 |
|    |        |        |          | 58 -> 63 | 0.29451  |
|    |        |        |          | 59 -> 64 | 0.27070  |
|    |        |        |          | 59 -> 65 | -0.16671 |
|    |        |        |          | 59 -> 66 | -0.13333 |
|    |        |        |          | 61 -> 64 | -0.24829 |
|    |        |        |          | 61 -> 65 | 0.12254  |
|    |        |        |          | 61 -> 66 | -0.28176 |
| 21 | 5.5677 | 222.68 | f=0.0000 | 56 -> 63 | -0.13792 |
|    |        |        |          | 57 -> 63 | 0.17334  |
|    |        |        |          | 57 -> 64 | 0.13853  |
|    |        |        |          | 57 -> 66 | -0.14605 |

|    |        |        |          |          |          |
|----|--------|--------|----------|----------|----------|
|    |        |        |          | 59 -> 64 | 0.30812  |
|    |        |        |          | 59 -> 65 | -0.18060 |
|    |        |        |          | 59 -> 66 | 0.19905  |
|    |        |        |          | 61 -> 64 | -0.23030 |
|    |        |        |          | 61 -> 65 | 0.16925  |
|    |        |        |          | 61 -> 66 | 0.33691  |
| 22 | 5.6629 | 218.94 | f=0.0000 | 55 -> 62 | 0.47398  |
|    |        |        |          | 57 -> 63 | -0.11448 |
|    |        |        |          | 57 -> 64 | 0.17269  |
|    |        |        |          | 57 -> 65 | 0.25075  |
|    |        |        |          | 58 -> 65 | 0.13590  |
|    |        |        |          | 59 -> 67 | -0.19106 |
| 23 | 5.7089 | 217.18 | f=0.0000 | 61 -> 67 | -0.19825 |
|    |        |        |          | 48 -> 62 | 0.10525  |
|    |        |        |          | 49 -> 62 | -0.15130 |
|    |        |        |          | 51 -> 62 | 0.18731  |
|    |        |        |          | 54 -> 62 | 0.51964  |
| 24 | 5.7521 | 215.54 | f=0.0000 | 60 -> 67 | 0.32197  |
|    |        |        |          | 51 -> 62 | -0.14106 |
|    |        |        |          | 52 -> 62 | -0.14526 |
|    |        |        |          | 53 -> 62 | -0.31155 |
|    |        |        |          | 54 -> 62 | -0.19856 |
|    |        |        |          | 60 -> 62 | 0.12054  |
|    |        |        |          | 60 -> 66 | -0.10620 |
|    |        |        |          | 60 -> 67 | 0.50990  |
| 25 | 5.8373 | 212.40 | f=0.0000 | 57 -> 65 | -0.12000 |
|    |        |        |          | 58 -> 63 | 0.16887  |
|    |        |        |          | 58 -> 64 | 0.22026  |
|    |        |        |          | 58 -> 65 | 0.47894  |
|    |        |        |          | 58 -> 66 | 0.10929  |
|    |        |        |          | 58 -> 67 | -0.32232 |
|    |        |        |          | 59 -> 64 | -0.14558 |
| 26 | 5.8810 | 210.82 | f=0.0000 | 50 -> 62 | -0.10732 |
|    |        |        |          | 56 -> 63 | 0.43440  |
|    |        |        |          | 57 -> 63 | 0.12963  |
|    |        |        |          | 57 -> 65 | 0.18876  |
|    |        |        |          | 57 -> 66 | -0.12333 |
|    |        |        |          | 59 -> 66 | 0.37408  |
|    |        |        |          | 61 -> 66 | -0.23467 |
| 27 | 5.9257 | 209.23 | f=0.0000 | 53 -> 62 | 0.55693  |
|    |        |        |          | 54 -> 62 | -0.31195 |
|    |        |        |          | 60 -> 67 | 0.22128  |
| 28 | 5.9995 | 206.66 | f=0.0000 | 42 -> 62 | -0.14012 |

|    |        |        |          |          |          |
|----|--------|--------|----------|----------|----------|
|    |        |        |          | 50 -> 62 | 0.31942  |
|    |        |        |          | 55 -> 62 | 0.16119  |
|    |        |        |          | 55 -> 65 | 0.13290  |
|    |        |        |          | 56 -> 63 | 0.12255  |
|    |        |        |          | 56 -> 65 | 0.11547  |
|    |        |        |          | 57 -> 64 | -0.19331 |
|    |        |        |          | 57 -> 65 | -0.27501 |
|    |        |        |          | 57 -> 67 | -0.16898 |
|    |        |        |          | 59 -> 65 | -0.11487 |
|    |        |        |          | 59 -> 66 | 0.27282  |
|    |        |        |          | 61 -> 74 | 0.10957  |
| 29 | 6.0968 | 203.36 | f=0.0000 | 48 -> 62 | 0.15079  |
|    |        |        |          | 51 -> 62 | 0.45892  |
|    |        |        |          | 52 -> 62 | 0.30924  |
|    |        |        |          | 53 -> 62 | -0.21937 |
|    |        |        |          | 54 -> 62 | -0.24687 |
|    |        |        |          | 60 -> 66 | -0.11686 |
| 30 | 6.1368 | 202.03 | f=0.0000 | 50 -> 62 | 0.14222  |
|    |        |        |          | 55 -> 63 | -0.24035 |
|    |        |        |          | 56 -> 63 | -0.13881 |
|    |        |        |          | 57 -> 65 | 0.16875  |
|    |        |        |          | 59 -> 65 | 0.11153  |
|    |        |        |          | 59 -> 66 | 0.18968  |
|    |        |        |          | 59 -> 67 | -0.13200 |
|    |        |        |          | 61 -> 65 | -0.10199 |
|    |        |        |          | 61 -> 67 | 0.47531  |
|    |        |        |          | 61 -> 74 | 0.12679  |

**Table S3. 30 TDDFT singlet excitations of azo 2 from *trans*-S<sub>0</sub> geometry, B3LYP/6-311G(d,p)/PCM(ACN)**

| Excited States | Energy (eV) | Wavelength (nm) | Oscillator Strength | Transition | Transition Contribution |
|----------------|-------------|-----------------|---------------------|------------|-------------------------|
| 1              | 2.6587      | 466.33          | f=0.0000            | 64 -> 66   | 0.70116                 |
| 2              | 3.1739      | 390.64          | f=1.0204            | 63 -> 66   | -0.11004                |
|                |             |                 |                     | 65 -> 66   | 0.69253                 |
| 3              | 3.4846      | 355.81          | f=0.2441            | 62 -> 66   | -0.10025                |
|                |             |                 |                     | 63 -> 66   | 0.66528                 |
|                |             |                 |                     | 65 -> 66   | 0.12937                 |
|                |             |                 |                     | 65 -> 67   | -0.14970                |
| 4              | 4.1693      | 297.37          | f=0.0606            | 61 -> 66   | 0.14451                 |
|                |             |                 |                     | 62 -> 66   | 0.33353                 |
|                |             |                 |                     | 63 -> 66   | 0.17815                 |
|                |             |                 |                     | 65 -> 67   | 0.54849                 |
| 5              | 4.2009      | 295.13          | f=0.0217            | 61 -> 66   | 0.53885                 |
|                |             |                 |                     | 62 -> 66   | 0.25296                 |
|                |             |                 |                     | 65 -> 67   | -0.30154                |
|                |             |                 |                     | 65 -> 68   | -0.19132                |
| 6              | 4.3106      | 287.63          | f=0.0074            | 61 -> 66   | -0.34594                |
|                |             |                 |                     | 62 -> 66   | 0.51236                 |
|                |             |                 |                     | 63 -> 67   | -0.15601                |
|                |             |                 |                     | 65 -> 67   | -0.24572                |
|                |             |                 |                     | 65 -> 69   | 0.11680                 |
| 7              | 4.3750      | 283.39          | f=0.0000            | 64 -> 67   | 0.69903                 |
| 8              | 4.7366      | 261.76          | f=0.1638            | 62 -> 67   | -0.10467                |
|                |             |                 |                     | 63 -> 67   | 0.55965                 |
|                |             |                 |                     | 65 -> 68   | -0.21121                |
|                |             |                 |                     | 65 -> 69   | 0.31599                 |
| 9              | 4.9325      | 251.36          | f=0.2406            | 61 -> 66   | 0.21332                 |
|                |             |                 |                     | 63 -> 67   | 0.21795                 |
|                |             |                 |                     | 65 -> 68   | 0.59958                 |
| 10             | 4.9952      | 248.21          | f=0.0000            | 64 -> 68   | 0.70511                 |
| 11             | 5.0745      | 244.33          | f=0.0122            | 60 -> 66   | 0.60509                 |
|                |             |                 |                     | 62 -> 67   | 0.24454                 |
|                |             |                 |                     | 63 -> 67   | 0.10580                 |
|                |             |                 |                     | 63 -> 69   | 0.10002                 |
|                |             |                 |                     | 65 -> 70   | -0.14899                |
| 12             | 5.1207      | 242.12          | f=0.0093            | 60 -> 66   | -0.29394                |
|                |             |                 |                     | 62 -> 67   | 0.45470                 |
|                |             |                 |                     | 63 -> 67   | 0.18976                 |
|                |             |                 |                     | 63 -> 69   | 0.21859                 |

|    |        |        |          |          |          |
|----|--------|--------|----------|----------|----------|
|    |        |        |          | 65 -> 68 | -0.10317 |
|    |        |        |          | 65 -> 69 | -0.24811 |
| 13 | 5.3345 | 232.42 | f=0.0004 | 64 -> 69 | 0.69678  |
| 14 | 5.4450 | 227.70 | f=0.0329 | 63 -> 68 | 0.62270  |
|    |        |        |          | 65 -> 69 | -0.27384 |
| 15 | 5.6089 | 221.05 | f=0.1554 | 59 -> 66 | -0.13916 |
|    |        |        |          | 61 -> 67 | -0.23784 |
|    |        |        |          | 61 -> 68 | -0.13613 |
|    |        |        |          | 62 -> 66 | -0.10452 |
|    |        |        |          | 62 -> 67 | 0.17907  |
|    |        |        |          | 63 -> 67 | -0.15142 |
|    |        |        |          | 63 -> 68 | 0.20985  |
|    |        |        |          | 63 -> 69 | 0.32133  |
|    |        |        |          | 65 -> 69 | 0.40020  |
| 16 | 5.6951 | 217.70 | f=0.0060 | 61 -> 67 | 0.64553  |
|    |        |        |          | 62 -> 67 | 0.13947  |
|    |        |        |          | 63 -> 68 | 0.11696  |
|    |        |        |          | 65 -> 69 | 0.12167  |
|    |        |        |          | 65 -> 70 | -0.11293 |
| 17 | 5.7791 | 214.54 | f=0.0090 | 60 -> 66 | 0.13387  |
|    |        |        |          | 60 -> 67 | 0.29738  |
|    |        |        |          | 61 -> 67 | 0.11209  |
|    |        |        |          | 63 -> 70 | -0.18579 |
|    |        |        |          | 65 -> 70 | 0.56934  |
| 18 | 5.8467 | 212.06 | f=0.2033 | 59 -> 66 | 0.56990  |
|    |        |        |          | 62 -> 67 | -0.17039 |
|    |        |        |          | 63 -> 69 | 0.29596  |
|    |        |        |          | 65 -> 71 | -0.14120 |
| 19 | 5.9819 | 207.27 | f=0.0003 | 54 -> 66 | -0.10812 |
|    |        |        |          | 58 -> 66 | 0.68566  |
| 20 | 5.9933 | 206.87 | f=0.3558 | 59 -> 66 | -0.29196 |
|    |        |        |          | 60 -> 67 | 0.15794  |
|    |        |        |          | 62 -> 67 | -0.29899 |
|    |        |        |          | 63 -> 69 | 0.37678  |
|    |        |        |          | 63 -> 70 | -0.18559 |
|    |        |        |          | 65 -> 69 | -0.15409 |
|    |        |        |          | 65 -> 70 | -0.17979 |
|    |        |        |          | 65 -> 71 | 0.15799  |
| 21 | 6.0736 | 204.14 | f=0.0896 | 60 -> 67 | -0.16171 |
|    |        |        |          | 62 -> 68 | 0.55576  |
|    |        |        |          | 63 -> 68 | -0.11199 |
|    |        |        |          | 63 -> 69 | 0.17357  |
|    |        |        |          | 63 -> 70 | 0.19763  |

|    |        |        |          |          |          |
|----|--------|--------|----------|----------|----------|
| 22 | 6.0936 | 203.46 | f=0.0327 | 65 -> 70 | 0.11359  |
|    |        |        |          | 65 -> 71 | 0.13341  |
| 23 | 6.1358 | 202.07 | f=0.0000 | 60 -> 67 | -0.31093 |
|    |        |        |          | 62 -> 68 | -0.35298 |
| 24 | 6.1682 | 201.01 | f=0.0005 | 63 -> 69 | 0.18925  |
|    |        |        |          | 63 -> 70 | 0.35597  |
| 25 | 6.2628 | 197.97 | f=0.0004 | 65 -> 70 | 0.22378  |
|    |        |        |          | 65 -> 71 | 0.12402  |
| 26 | 6.2660 | 197.87 | f=0.0436 | 57 -> 66 | 0.44526  |
|    |        |        |          | 64 -> 70 | 0.43349  |
| 27 | 6.4133 | 193.32 | f=0.0000 | 64 -> 71 | -0.30166 |
|    |        |        |          | 57 -> 66 | -0.41944 |
| 28 | 6.4413 | 192.48 | f=0.0001 | 64 -> 70 | 0.53946  |
|    |        |        |          | 64 -> 71 | 0.13493  |
| 29 | 6.4838 | 191.22 | f=0.0227 | 57 -> 66 | 0.31749  |
|    |        |        |          | 64 -> 71 | 0.61174  |
| 30 | 6.5282 | 189.92 | f=0.0376 | 59 -> 66 | 0.14111  |
|    |        |        |          | 61 -> 68 | 0.29805  |
|    |        |        |          | 62 -> 67 | 0.11108  |
|    |        |        |          | 62 -> 69 | 0.17541  |
|    |        |        |          | 65 -> 71 | 0.55564  |
|    |        |        |          | 56 -> 66 | 0.68680  |
|    |        |        |          | 62 -> 72 | 0.12967  |
|    |        |        |          | 63 -> 72 | 0.20522  |
|    |        |        |          | 65 -> 72 | 0.65978  |
|    |        |        |          | 55 -> 66 | 0.13793  |
|    |        |        |          | 60 -> 67 | -0.33780 |
|    |        |        |          | 61 -> 68 | -0.13617 |
|    |        |        |          | 62 -> 69 | 0.44566  |
|    |        |        |          | 63 -> 70 | -0.32742 |
|    |        |        |          | 55 -> 66 | -0.34134 |
|    |        |        |          | 60 -> 67 | 0.25325  |
|    |        |        |          | 61 -> 68 | -0.30431 |
|    |        |        |          | 62 -> 69 | 0.34393  |
|    |        |        |          | 63 -> 70 | 0.21482  |



**Table S4. 30 TDDFT triplet excitations of azo 2 from *trans*-S<sub>0</sub> geometry, B3LYP/6-311G(d,p)/PCM(ACN)**

| Excited States | Energy (eV) | Wavelength (nm) | Oscillator Strength | Transition | Transition Contribution |
|----------------|-------------|-----------------|---------------------|------------|-------------------------|
| 1              | 1.9333      | 641.30          | f=0.0000            | 64 -> 66   | 0.68446                 |
|                |             |                 |                     | 64 -> 71   | -0.13988                |
| 2              | 1.9772      | 627.07          | f=0.0000            | 63 -> 67   | 0.12350                 |
|                |             |                 |                     | 65 -> 66   | 0.67059                 |
| 3              | 2.8371      | 437.01          | f=0.0000            | 62 -> 66   | 0.17266                 |
|                |             |                 |                     | 63 -> 66   | 0.51038                 |
|                |             |                 |                     | 63 -> 67   | -0.24374                |
|                |             |                 |                     | 65 -> 67   | 0.33617                 |
| 4              | 3.1913      | 388.51          | f=0.0000            | 65 -> 69   | -0.13267                |
|                |             |                 |                     | 62 -> 66   | -0.11447                |
|                |             |                 |                     | 63 -> 66   | 0.43841                 |
|                |             |                 |                     | 63 -> 67   | 0.37271                 |
|                |             |                 |                     | 65 -> 66   | -0.16425                |
| 5              | 3.5486      | 349.39          | f=0.0000            | 65 -> 67   | -0.30860                |
|                |             |                 |                     | 62 -> 66   | 0.61800                 |
|                |             |                 |                     | 63 -> 67   | 0.19468                 |
|                |             |                 |                     | 65 -> 67   | -0.13637                |
| 6              | 3.8002      | 326.26          | f=0.0000            | 65 -> 69   | -0.13290                |
|                |             |                 |                     | 61 -> 66   | 0.66267                 |
|                |             |                 |                     | 61 -> 68   | 0.13296                 |
|                |             |                 |                     | 65 -> 68   | 0.12081                 |
| 7              | 3.8746      | 319.99          | f=0.0000            | 62 -> 67   | -0.29165                |
|                |             |                 |                     | 63 -> 67   | 0.40937                 |
|                |             |                 |                     | 65 -> 67   | 0.46500                 |
| 8              | 4.0956      | 302.73          | f=0.0000            | 61 -> 66   | -0.10522                |
|                |             |                 |                     | 61 -> 68   | -0.14607                |
|                |             |                 |                     | 62 -> 68   | 0.14484                 |
|                |             |                 |                     | 63 -> 68   | 0.24507                 |
|                |             |                 |                     | 65 -> 68   | 0.57699                 |
| 9              | 4.1536      | 298.50          | f=0.0000            | 65 -> 69   | 0.16973                 |
|                |             |                 |                     | 59 -> 66   | -0.12565                |
|                |             |                 |                     | 60 -> 66   | 0.38910                 |
|                |             |                 |                     | 60 -> 67   | -0.30333                |
|                |             |                 |                     | 62 -> 67   | -0.12494                |
|                |             |                 |                     | 63 -> 69   | 0.13833                 |
|                |             |                 |                     | 63 -> 70   | -0.21462                |
| 65 -> 69       | -0.13520    |                 |                     |            |                         |
|                |             |                 |                     | 65 -> 70   | 0.28917                 |

|    |        |        |          |          |          |
|----|--------|--------|----------|----------|----------|
| 10 | 4.2546 | 291.41 | f=0.0000 | 65 -> 71 | -0.10349 |
|    |        |        |          | 61 -> 66 | -0.13870 |
|    |        |        |          | 61 -> 68 | 0.51883  |
|    |        |        |          | 61 -> 69 | 0.14163  |
|    |        |        |          | 62 -> 66 | -0.17601 |
|    |        |        |          | 62 -> 68 | 0.10179  |
|    |        |        |          | 65 -> 68 | 0.15336  |
|    |        |        |          | 65 -> 69 | -0.24570 |
| 11 | 4.3163 | 287.25 | f=0.0000 | 65 -> 71 | 0.12685  |
|    |        |        |          | 64 -> 66 | -0.10638 |
| 12 | 4.5768 | 270.90 | f=0.0000 | 64 -> 67 | 0.68753  |
|    |        |        |          | 59 -> 66 | 0.14953  |
|    |        |        |          | 60 -> 67 | -0.20162 |
|    |        |        |          | 61 -> 68 | 0.21575  |
|    |        |        |          | 62 -> 68 | 0.12700  |
|    |        |        |          | 62 -> 69 | -0.14234 |
|    |        |        |          | 63 -> 70 | -0.14360 |
|    |        |        |          | 65 -> 68 | -0.11359 |
|    |        |        |          | 65 -> 69 | 0.46419  |
|    |        |        |          | 65 -> 70 | 0.15863  |
|    |        |        |          | 65 -> 71 | 0.15894  |
| 13 | 4.7364 | 261.77 | f=0.0000 | 59 -> 66 | -0.23913 |
|    |        |        |          | 60 -> 66 | 0.30364  |
|    |        |        |          | 60 -> 67 | 0.22024  |
|    |        |        |          | 61 -> 68 | 0.18875  |
|    |        |        |          | 62 -> 66 | 0.11726  |
|    |        |        |          | 63 -> 70 | 0.22192  |
|    |        |        |          | 65 -> 69 | 0.26298  |
|    |        |        |          | 65 -> 70 | -0.12905 |
|    |        |        |          | 65 -> 71 | -0.23494 |
| 14 | 4.8412 | 256.10 | f=0.0000 | 59 -> 66 | -0.19097 |
|    |        |        |          | 59 -> 67 | -0.16691 |
|    |        |        |          | 62 -> 67 | 0.40272  |
|    |        |        |          | 62 -> 69 | 0.15641  |
|    |        |        |          | 63 -> 67 | 0.19618  |
|    |        |        |          | 63 -> 68 | 0.12314  |
|    |        |        |          | 63 -> 69 | -0.28584 |
|    |        |        |          | 63 -> 70 | -0.11710 |
|    |        |        |          | 63 -> 71 | -0.15478 |
|    |        |        |          | 65 -> 67 | 0.10781  |
| 15 | 4.9345 | 251.26 | f=0.0000 | 59 -> 66 | 0.25683  |
|    |        |        |          | 60 -> 66 | 0.43782  |
|    |        |        |          | 60 -> 67 | 0.11238  |

|    |        |        |          |          |          |
|----|--------|--------|----------|----------|----------|
|    |        |        |          | 61 -> 68 | -0.10073 |
|    |        |        |          | 62 -> 67 | 0.29873  |
|    |        |        |          | 62 -> 69 | -0.13587 |
|    |        |        |          | 63 -> 67 | 0.11059  |
|    |        |        |          | 63 -> 71 | 0.12488  |
|    |        |        |          | 65 -> 67 | 0.11148  |
|    |        |        |          | 65 -> 71 | 0.17406  |
| 16 | 4.9692 | 249.51 | f=0.0000 | 64 -> 68 | 0.70448  |
| 17 | 5.0928 | 243.45 | f=0.0000 | 60 -> 66 | -0.13781 |
|    |        |        |          | 61 -> 68 | 0.11774  |
|    |        |        |          | 62 -> 67 | 0.32010  |
|    |        |        |          | 63 -> 68 | -0.24017 |
|    |        |        |          | 63 -> 69 | 0.46977  |
|    |        |        |          | 65 -> 67 | 0.10149  |
|    |        |        |          | 65 -> 71 | -0.17707 |
| 18 | 5.2242 | 237.33 | f=0.0000 | 64 -> 69 | 0.68503  |
| 19 | 5.3566 | 231.46 | f=0.0000 | 59 -> 67 | 0.11551  |
|    |        |        |          | 62 -> 68 | 0.15074  |
|    |        |        |          | 62 -> 70 | -0.10728 |
|    |        |        |          | 63 -> 68 | 0.48028  |
|    |        |        |          | 63 -> 69 | 0.18841  |
|    |        |        |          | 65 -> 68 | -0.26513 |
|    |        |        |          | 65 -> 69 | -0.11610 |
|    |        |        |          | 65 -> 70 | 0.20067  |
| 20 | 5.4360 | 228.08 | f=0.0000 | 59 -> 67 | 0.14440  |
|    |        |        |          | 60 -> 67 | 0.13507  |
|    |        |        |          | 62 -> 68 | -0.11290 |
|    |        |        |          | 62 -> 69 | 0.16833  |
|    |        |        |          | 62 -> 70 | -0.23888 |
|    |        |        |          | 63 -> 68 | -0.23257 |
|    |        |        |          | 63 -> 69 | -0.17119 |
|    |        |        |          | 63 -> 70 | 0.16184  |
|    |        |        |          | 65 -> 68 | 0.10804  |
|    |        |        |          | 65 -> 70 | 0.41822  |
| 21 | 5.5288 | 224.25 | f=0.0000 | 59 -> 66 | 0.43195  |
|    |        |        |          | 59 -> 67 | -0.10195 |
|    |        |        |          | 61 -> 68 | 0.13784  |
|    |        |        |          | 62 -> 68 | -0.14940 |
|    |        |        |          | 62 -> 69 | 0.33390  |
|    |        |        |          | 62 -> 70 | 0.10451  |
|    |        |        |          | 63 -> 71 | -0.12838 |
|    |        |        |          | 65 -> 70 | -0.13050 |
|    |        |        |          | 65 -> 71 | -0.20769 |

|    |        |        |          |          |          |
|----|--------|--------|----------|----------|----------|
| 22 | 5.6698 | 218.67 | f=0.0000 | 61 -> 67 | 0.68048  |
| 23 | 5.7636 | 215.12 | f=0.0000 | 55 -> 66 | -0.28426 |
|    |        |        |          | 59 -> 66 | 0.13994  |
|    |        |        |          | 59 -> 69 | 0.13036  |
|    |        |        |          | 60 -> 67 | 0.29668  |
|    |        |        |          | 61 -> 67 | 0.10567  |
|    |        |        |          | 62 -> 69 | -0.24146 |
|    |        |        |          | 62 -> 71 | -0.10566 |
|    |        |        |          | 63 -> 69 | -0.11729 |
|    |        |        |          | 63 -> 70 | -0.15935 |
|    |        |        |          | 63 -> 71 | -0.11137 |
|    |        |        |          | 65 -> 69 | -0.11969 |
|    |        |        |          | 65 -> 70 | 0.24318  |
|    |        |        |          | 65 -> 71 | -0.14847 |
| 24 | 5.8050 | 213.58 | f=0.0000 | 54 -> 66 | -0.28327 |
|    |        |        |          | 58 -> 66 | 0.53959  |
|    |        |        |          | 64 -> 71 | -0.27824 |
| 25 | 5.8610 | 211.54 | f=0.0000 | 59 -> 66 | -0.14997 |
|    |        |        |          | 60 -> 67 | 0.36318  |
|    |        |        |          | 62 -> 68 | -0.26997 |
|    |        |        |          | 62 -> 70 | 0.11238  |
|    |        |        |          | 63 -> 69 | 0.15621  |
|    |        |        |          | 63 -> 70 | -0.33283 |
|    |        |        |          | 65 -> 69 | 0.10621  |
|    |        |        |          | 65 -> 71 | 0.22780  |
| 26 | 5.9221 | 209.36 | f=0.0000 | 54 -> 66 | -0.11287 |
|    |        |        |          | 57 -> 66 | -0.31116 |
|    |        |        |          | 58 -> 66 | 0.18139  |
|    |        |        |          | 64 -> 66 | 0.11393  |
|    |        |        |          | 64 -> 71 | 0.55377  |
| 27 | 5.9358 | 208.88 | f=0.0000 | 55 -> 66 | 0.13609  |
|    |        |        |          | 59 -> 68 | 0.13905  |
|    |        |        |          | 60 -> 67 | 0.15937  |
|    |        |        |          | 62 -> 68 | 0.49995  |
|    |        |        |          | 62 -> 69 | 0.20463  |
|    |        |        |          | 63 -> 68 | -0.22018 |
|    |        |        |          | 63 -> 70 | -0.18147 |
| 28 | 6.0362 | 205.40 | f=0.0000 | 54 -> 66 | 0.16201  |
|    |        |        |          | 57 -> 66 | 0.52138  |
|    |        |        |          | 58 -> 66 | 0.32286  |
|    |        |        |          | 64 -> 71 | 0.21349  |
| 29 | 6.0577 | 204.67 | f=0.0000 | 55 -> 66 | 0.35251  |
|    |        |        |          | 59 -> 67 | 0.22830  |

|    |        |        |          |          |          |
|----|--------|--------|----------|----------|----------|
| 30 | 6.1412 | 201.89 | f=0.0000 | 62 -> 69 | -0.23808 |
|    |        |        |          | 63 -> 69 | -0.15970 |
|    |        |        |          | 63 -> 70 | -0.20365 |
|    |        |        |          | 65 -> 71 | -0.34167 |
|    |        |        |          | 57 -> 66 | 0.11501  |
|    |        |        |          | 64 -> 70 | 0.67490  |
|    |        |        |          |          |          |

**Table S5. 30 TDDFT singlet excitations of azo 3 from *trans*-S<sub>0</sub> geometry, B3LYP/6-311G(d,p)/PCM(ACN)**

| Excited States | Energy (eV) | Wavelength (nm) | Oscillator Strength | Transition | Transition Contribution |
|----------------|-------------|-----------------|---------------------|------------|-------------------------|
| 1              | 2.6481      | 468.20          | f=0.0000            | 68 -> 70   | 0.70118                 |
| 2              | 3.1354      | 395.43          | f=1.1190            | 69 -> 70   | 0.69816                 |
| 3              | 3.4603      | 358.30          | f=0.1732            | 66 -> 70   | -0.10445                |
|                |             |                 |                     | 67 -> 70   | 0.66856                 |
|                |             |                 |                     | 69 -> 71   | -0.15312                |
| 4              | 4.1302      | 300.19          | f=0.0412            | 65 -> 70   | 0.27224                 |
|                |             |                 |                     | 66 -> 70   | 0.46949                 |
|                |             |                 |                     | 67 -> 70   | 0.15260                 |
|                |             |                 |                     | 69 -> 71   | 0.37119                 |
|                |             |                 |                     | 69 -> 72   | 0.14261                 |
| 5              | 4.1702      | 297.31          | f=0.0528            | 65 -> 70   | -0.39024                |
|                |             |                 |                     | 66 -> 70   | -0.19229                |
|                |             |                 |                     | 67 -> 70   | 0.10897                 |
|                |             |                 |                     | 69 -> 71   | 0.51381                 |
|                |             |                 |                     | 69 -> 72   | -0.12805                |
| 6              | 4.2853      | 289.32          | f=0.0054            | 65 -> 70   | 0.45329                 |
|                |             |                 |                     | 66 -> 70   | -0.42993                |
|                |             |                 |                     | 67 -> 71   | 0.14201                 |
|                |             |                 |                     | 69 -> 71   | 0.22697                 |
|                |             |                 |                     | 69 -> 72   | 0.10715                 |
|                |             |                 |                     | 69 -> 73   | -0.12215                |
| 7              | 4.3654      | 284.01          | f=0.0000            | 68 -> 71   | 0.69909                 |
| 8              | 4.7222      | 262.56          | f=0.1667            | 66 -> 71   | -0.10057                |
|                |             |                 |                     | 67 -> 71   | 0.56475                 |
|                |             |                 |                     | 69 -> 72   | 0.23529                 |
|                |             |                 |                     | 69 -> 73   | 0.28942                 |
| 9              | 4.9151      | 252.25          | f=0.2653            | 65 -> 70   | -0.19090                |
|                |             |                 |                     | 66 -> 70   | -0.10341                |
|                |             |                 |                     | 66 -> 71   | -0.13123                |
|                |             |                 |                     | 67 -> 71   | -0.24456                |
|                |             |                 |                     | 69 -> 72   | 0.58240                 |
| 10             | 5.0151      | 247.22          | f=0.0000            | 68 -> 72   | 0.70460                 |
| 11             | 5.0600      | 245.03          | f=0.0234            | 64 -> 70   | 0.47766                 |
|                |             |                 |                     | 66 -> 71   | 0.37288                 |
|                |             |                 |                     | 67 -> 71   | 0.14366                 |
|                |             |                 |                     | 67 -> 72   | 0.11328                 |
|                |             |                 |                     | 67 -> 73   | 0.15328                 |
|                |             |                 |                     | 69 -> 72   | 0.10620                 |

|    |        |        |          |          |          |
|----|--------|--------|----------|----------|----------|
| 12 | 5.0882 | 243.67 | f=0.0033 | 69 -> 73 | -0.14826 |
|    |        |        |          | 69 -> 74 | -0.11967 |
|    |        |        |          | 64 -> 70 | 0.47076  |
|    |        |        |          | 66 -> 71 | -0.34073 |
|    |        |        |          | 67 -> 71 | -0.11942 |
|    |        |        |          | 67 -> 73 | -0.16395 |
|    |        |        |          | 69 -> 72 | -0.10788 |
|    |        |        |          | 69 -> 73 | 0.23540  |
|    |        |        |          | 69 -> 74 | -0.11551 |
| 13 | 5.3347 | 232.41 | f=0.0004 | 68 -> 73 | 0.69688  |
| 14 | 5.4347 | 228.13 | f=0.0446 | 67 -> 72 | 0.55989  |
|    |        |        |          | 69 -> 73 | 0.36885  |
| 15 | 5.5766 | 222.33 | f=0.1150 | 63 -> 70 | 0.21496  |
|    |        |        |          | 65 -> 71 | 0.22073  |
|    |        |        |          | 65 -> 72 | -0.12852 |
|    |        |        |          | 66 -> 71 | -0.17494 |
|    |        |        |          | 67 -> 71 | 0.11898  |
|    |        |        |          | 67 -> 72 | 0.32176  |
|    |        |        |          | 67 -> 73 | -0.31925 |
|    |        |        |          | 69 -> 72 | -0.11868 |
|    |        |        |          | 69 -> 73 | -0.31468 |
| 16 | 5.6619 | 218.98 | f=0.0091 | 63 -> 70 | -0.15966 |
|    |        |        |          | 65 -> 71 | 0.63310  |
|    |        |        |          | 66 -> 71 | 0.18185  |
|    |        |        |          | 67 -> 72 | -0.12093 |
| 17 | 5.7463 | 215.76 | f=0.0654 | 63 -> 70 | 0.49955  |
|    |        |        |          | 64 -> 70 | -0.13386 |
|    |        |        |          | 64 -> 71 | -0.11719 |
|    |        |        |          | 67 -> 73 | 0.20807  |
|    |        |        |          | 69 -> 73 | 0.10020  |
|    |        |        |          | 69 -> 74 | -0.34044 |
|    |        |        |          | 69 -> 75 | -0.12457 |
| 18 | 5.7702 | 214.87 | f=0.0124 | 63 -> 70 | 0.28283  |
|    |        |        |          | 64 -> 71 | 0.26630  |
|    |        |        |          | 65 -> 71 | 0.16657  |
|    |        |        |          | 67 -> 73 | 0.18878  |
|    |        |        |          | 67 -> 74 | -0.16988 |
|    |        |        |          | 69 -> 74 | 0.47025  |
| 19 | 5.9364 | 208.85 | f=0.0003 | 58 -> 70 | 0.13730  |
|    |        |        |          | 61 -> 70 | 0.11836  |
|    |        |        |          | 62 -> 70 | 0.66474  |
| 20 | 5.9697 | 207.69 | f=0.4394 | 63 -> 70 | -0.21404 |
|    |        |        |          | 64 -> 71 | 0.18095  |

|    |        |        |          |          |          |
|----|--------|--------|----------|----------|----------|
|    |        |        |          | 66 -> 71 | -0.31296 |
|    |        |        |          | 67 -> 73 | 0.39461  |
|    |        |        |          | 67 -> 74 | -0.19256 |
|    |        |        |          | 69 -> 73 | -0.14654 |
|    |        |        |          | 69 -> 74 | -0.20667 |
|    |        |        |          | 69 -> 75 | 0.11240  |
| 21 | 5.9846 | 207.17 | f=0.0002 | 61 -> 70 | 0.67468  |
|    |        |        |          | 62 -> 70 | -0.11115 |
| 22 | 6.0639 | 204.46 | f=0.1198 | 64 -> 71 | 0.24927  |
|    |        |        |          | 66 -> 71 | 0.10924  |
|    |        |        |          | 66 -> 72 | 0.41588  |
|    |        |        |          | 67 -> 72 | -0.10830 |
|    |        |        |          | 67 -> 73 | -0.22328 |
|    |        |        |          | 67 -> 74 | -0.29404 |
|    |        |        |          | 69 -> 74 | -0.16483 |
|    |        |        |          | 69 -> 75 | -0.18186 |
| 23 | 6.0840 | 203.79 | f=0.0257 | 64 -> 71 | -0.24247 |
|    |        |        |          | 66 -> 72 | 0.50486  |
|    |        |        |          | 66 -> 73 | -0.10345 |
|    |        |        |          | 67 -> 73 | 0.15447  |
|    |        |        |          | 67 -> 74 | 0.27286  |
|    |        |        |          | 69 -> 74 | 0.16267  |
| 24 | 6.1435 | 201.81 | f=0.0002 | 68 -> 74 | 0.67982  |
|    |        |        |          | 68 -> 75 | -0.15051 |
| 25 | 6.2087 | 199.69 | f=0.0720 | 60 -> 70 | 0.21368  |
|    |        |        |          | 63 -> 70 | 0.11125  |
|    |        |        |          | 65 -> 72 | -0.23445 |
|    |        |        |          | 66 -> 71 | 0.11076  |
|    |        |        |          | 66 -> 73 | 0.13620  |
|    |        |        |          | 69 -> 75 | 0.56709  |
| 26 | 6.2291 | 199.04 | f=0.0000 | 62 -> 70 | -0.10558 |
|    |        |        |          | 68 -> 74 | 0.15707  |
|    |        |        |          | 68 -> 75 | 0.66443  |
| 27 | 6.3546 | 195.11 | f=0.0005 | 58 -> 70 | -0.11286 |
|    |        |        |          | 59 -> 70 | 0.67208  |
| 28 | 6.3922 | 193.96 | f=0.0020 | 60 -> 70 | 0.63372  |
|    |        |        |          | 64 -> 71 | -0.12741 |
|    |        |        |          | 65 -> 72 | 0.12907  |
|    |        |        |          | 69 -> 75 | -0.15089 |
| 29 | 6.4620 | 191.87 | f=0.0324 | 64 -> 71 | -0.21562 |
|    |        |        |          | 65 -> 72 | 0.19853  |
|    |        |        |          | 66 -> 72 | 0.13380  |
|    |        |        |          | 66 -> 73 | 0.54400  |



|    |        |        |          |          |          |
|----|--------|--------|----------|----------|----------|
| 30 | 6.5344 | 189.74 | f=0.0762 | 67 -> 74 | -0.23305 |
|    |        |        |          | 60 -> 70 | 0.10602  |
|    |        |        |          | 64 -> 71 | 0.40328  |
|    |        |        |          | 65 -> 72 | 0.29517  |
|    |        |        |          | 66 -> 72 | 0.10565  |
|    |        |        |          | 66 -> 73 | 0.17498  |
|    |        |        |          | 67 -> 74 | 0.37040  |

**Table S6. 30 TDDFT triplet excitations of azo 3 from *trans*-S<sub>0</sub> geometry, B3LYP/6-311G(d,p)/PCM(ACN)**

| Excited States | Energy (eV) | Wavelength (nm) | Oscillator Strength | Transition | Transition Contribution |
|----------------|-------------|-----------------|---------------------|------------|-------------------------|
| 1              | 1.9247      | 644.19          | f=0.0000            | 68 -> 70   | 0.68450                 |
|                |             |                 |                     | 68 -> 75   | -0.14062                |
| 2              | 1.9628      | 631.66          | f=0.0000            | 67 -> 71   | 0.12340                 |
|                |             |                 |                     | 69 -> 70   | 0.67279                 |
| 3              | 2.8225      | 439.27          | f=0.0000            | 66 -> 70   | 0.16317                 |
|                |             |                 |                     | 67 -> 70   | 0.51737                 |
|                |             |                 |                     | 67 -> 71   | -0.25299                |
|                |             |                 |                     | 69 -> 71   | 0.32226                 |
| 4              | 3.1900      | 388.67          | f=0.0000            | 69 -> 73   | -0.12558                |
|                |             |                 |                     | 66 -> 70   | -0.12315                |
|                |             |                 |                     | 67 -> 70   | 0.43749                 |
|                |             |                 |                     | 67 -> 71   | 0.38509                 |
|                |             |                 |                     | 69 -> 70   | -0.14805                |
| 5              | 3.5221      | 352.02          | f=0.0000            | 69 -> 71   | -0.29734                |
|                |             |                 |                     | 66 -> 70   | 0.62243                 |
|                |             |                 |                     | 67 -> 71   | 0.19413                 |
|                |             |                 |                     | 69 -> 71   | -0.13766                |
| 6              | 3.7782      | 328.16          | f=0.0000            | 69 -> 73   | -0.11097                |
|                |             |                 |                     | 65 -> 70   | 0.66586                 |
|                |             |                 |                     | 65 -> 72   | -0.13270                |
|                |             |                 |                     | 69 -> 72   | -0.10968                |
| 7              | 3.8582      | 321.35          | f=0.0000            | 66 -> 71   | -0.30242                |
|                |             |                 |                     | 67 -> 71   | 0.38720                 |
|                |             |                 |                     | 69 -> 71   | 0.47567                 |
| 8              | 4.1009      | 302.34          | f=0.0000            | 65 -> 70   | 0.13109                 |
|                |             |                 |                     | 66 -> 72   | 0.14654                 |
|                |             |                 |                     | 67 -> 72   | 0.23574                 |
|                |             |                 |                     | 69 -> 72   | 0.58258                 |
| 9              | 4.1482      | 298.88          | f=0.0000            | 69 -> 73   | -0.16353                |
|                |             |                 |                     | 63 -> 70   | -0.11268                |
|                |             |                 |                     | 64 -> 70   | 0.39132                 |
|                |             |                 |                     | 64 -> 71   | -0.29175                |
|                |             |                 |                     | 66 -> 71   | -0.10109                |
|                |             |                 |                     | 66 -> 73   | 0.10222                 |
|                |             |                 |                     | 67 -> 73   | 0.13899                 |
| 67 -> 74       | -0.22222    |                 |                     |            |                         |
|                |             |                 |                     | 69 -> 72   | -0.16333                |
|                |             |                 |                     | 69 -> 73   | -0.15773                |

|    |        |        |          |          |          |
|----|--------|--------|----------|----------|----------|
| 10 | 4.2382 | 292.54 | f=0.0000 | 69 -> 74 | 0.26368  |
|    |        |        |          | 65 -> 72 | 0.50620  |
|    |        |        |          | 65 -> 73 | -0.19002 |
|    |        |        |          | 66 -> 70 | 0.15557  |
|    |        |        |          | 69 -> 73 | 0.27976  |
|    |        |        |          | 69 -> 75 | -0.15162 |
| 11 | 4.3070 | 287.87 | f=0.0000 | 68 -> 70 | -0.10524 |
|    |        |        |          | 68 -> 71 | 0.68775  |
| 12 | 4.5633 | 271.70 | f=0.0000 | 63 -> 70 | 0.15655  |
|    |        |        |          | 64 -> 71 | -0.20465 |
|    |        |        |          | 65 -> 72 | -0.21446 |
|    |        |        |          | 65 -> 73 | 0.10208  |
|    |        |        |          | 66 -> 72 | -0.16133 |
|    |        |        |          | 66 -> 73 | -0.12869 |
|    |        |        |          | 67 -> 72 | -0.11434 |
|    |        |        |          | 67 -> 74 | -0.15391 |
|    |        |        |          | 69 -> 72 | 0.14972  |
|    |        |        |          | 69 -> 73 | 0.42581  |
|    |        |        |          | 69 -> 74 | 0.15819  |
|    |        |        |          | 69 -> 75 | 0.16329  |
| 13 | 4.7162 | 262.89 | f=0.0000 | 63 -> 70 | -0.26336 |
|    |        |        |          | 64 -> 70 | 0.28945  |
|    |        |        |          | 64 -> 71 | 0.20336  |
|    |        |        |          | 65 -> 72 | -0.17678 |
|    |        |        |          | 66 -> 70 | 0.10677  |
|    |        |        |          | 67 -> 74 | 0.21305  |
|    |        |        |          | 69 -> 73 | 0.28079  |
|    |        |        |          | 69 -> 74 | -0.11518 |
|    |        |        |          | 69 -> 75 | -0.23737 |
| 14 | 4.8045 | 258.06 | f=0.0000 | 63 -> 70 | -0.16129 |
|    |        |        |          | 63 -> 71 | -0.16308 |
|    |        |        |          | 66 -> 71 | 0.44263  |
|    |        |        |          | 66 -> 73 | 0.12177  |
|    |        |        |          | 67 -> 71 | 0.21597  |
|    |        |        |          | 67 -> 72 | -0.12955 |
|    |        |        |          | 67 -> 73 | -0.24729 |
|    |        |        |          | 67 -> 74 | -0.11971 |
|    |        |        |          | 67 -> 75 | -0.13096 |
|    |        |        |          | 69 -> 71 | 0.13849  |
| 15 | 4.9165 | 252.18 | f=0.0000 | 63 -> 70 | 0.28997  |
|    |        |        |          | 64 -> 70 | 0.43183  |
|    |        |        |          | 64 -> 71 | 0.13334  |
|    |        |        |          | 66 -> 71 | 0.26018  |

|    |        |        |          |          |          |
|----|--------|--------|----------|----------|----------|
| 16 | 4.9865 | 248.64 | f=0.0000 | 66 -> 73 | -0.14245 |
| 17 | 5.0692 | 244.58 | f=0.0000 | 67 -> 75 | 0.13001  |
|    |        |        |          | 69 -> 71 | 0.10776  |
|    |        |        |          | 69 -> 75 | 0.15163  |
|    |        |        |          | 68 -> 72 | 0.70363  |
|    |        |        |          | 64 -> 70 | -0.16374 |
|    |        |        |          | 65 -> 72 | -0.13177 |
|    |        |        |          | 66 -> 71 | 0.28327  |
|    |        |        |          | 67 -> 72 | 0.27453  |
|    |        |        |          | 67 -> 73 | 0.45659  |
|    |        |        |          | 69 -> 75 | -0.19335 |
| 18 | 5.2271 | 237.19 | f=0.0000 | 68 -> 73 | 0.68541  |
| 19 | 5.3578 | 231.41 | f=0.0000 | 63 -> 70 | -0.13379 |
|    |        |        |          | 63 -> 71 | -0.14401 |
|    |        |        |          | 64 -> 71 | -0.12207 |
|    |        |        |          | 66 -> 73 | -0.19217 |
|    |        |        |          | 66 -> 74 | 0.17340  |
|    |        |        |          | 67 -> 72 | 0.36723  |
|    |        |        |          | 67 -> 73 | -0.12844 |
|    |        |        |          | 67 -> 74 | -0.11426 |
|    |        |        |          | 69 -> 72 | -0.18260 |
|    |        |        |          | 69 -> 73 | 0.10329  |
|    |        |        |          | 69 -> 74 | -0.30302 |
|    |        |        |          | 69 -> 75 | 0.10789  |
| 20 | 5.4300 | 228.33 | f=0.0000 | 63 -> 70 | 0.19916  |
|    |        |        |          | 65 -> 72 | -0.15130 |
|    |        |        |          | 66 -> 72 | 0.21216  |
|    |        |        |          | 66 -> 73 | 0.22209  |
|    |        |        |          | 66 -> 74 | -0.12828 |
|    |        |        |          | 67 -> 72 | 0.35544  |
|    |        |        |          | 67 -> 73 | -0.24165 |
|    |        |        |          | 69 -> 72 | -0.16710 |
|    |        |        |          | 69 -> 73 | 0.11630  |
|    |        |        |          | 69 -> 74 | 0.21713  |
| 21 | 5.4758 | 226.42 | f=0.0000 | 60 -> 71 | 0.11769  |
|    |        |        |          | 63 -> 70 | 0.35737  |
|    |        |        |          | 63 -> 71 | -0.12706 |
|    |        |        |          | 65 -> 72 | -0.12032 |
|    |        |        |          | 66 -> 73 | 0.23672  |
|    |        |        |          | 66 -> 74 | 0.19677  |
|    |        |        |          | 67 -> 72 | -0.11632 |
|    |        |        |          | 67 -> 73 | 0.10388  |
|    |        |        |          | 67 -> 74 | -0.10492 |

|    |        |        |          |          |          |
|----|--------|--------|----------|----------|----------|
|    |        |        |          | 67 -> 75 | -0.10941 |
|    |        |        |          | 69 -> 74 | -0.30424 |
| 22 | 5.6389 | 219.87 | f=0.0000 | 69 -> 75 | -0.20830 |
|    |        |        |          | 65 -> 71 | 0.66409  |
| 23 | 5.7350 | 216.19 | f=0.0000 | 66 -> 71 | 0.11694  |
|    |        |        |          | 60 -> 70 | 0.36339  |
|    |        |        |          | 63 -> 70 | -0.11325 |
|    |        |        |          | 63 -> 73 | -0.11390 |
|    |        |        |          | 64 -> 71 | -0.26712 |
|    |        |        |          | 65 -> 71 | -0.15286 |
|    |        |        |          | 66 -> 73 | 0.17633  |
|    |        |        |          | 66 -> 75 | 0.10805  |
|    |        |        |          | 67 -> 73 | 0.10066  |
|    |        |        |          | 67 -> 74 | 0.12754  |
|    |        |        |          | 67 -> 75 | 0.12332  |
|    |        |        |          | 69 -> 73 | 0.12030  |
|    |        |        |          | 69 -> 74 | -0.23542 |
|    |        |        |          | 69 -> 75 | 0.16528  |
| 24 | 5.7957 | 213.93 | f=0.0000 | 57 -> 70 | 0.14858  |
|    |        |        |          | 58 -> 70 | 0.26798  |
|    |        |        |          | 61 -> 70 | 0.44989  |
|    |        |        |          | 62 -> 70 | 0.36265  |
|    |        |        |          | 68 -> 75 | -0.15975 |
| 25 | 5.8103 | 213.39 | f=0.0000 | 61 -> 70 | -0.23967 |
|    |        |        |          | 62 -> 70 | 0.48945  |
|    |        |        |          | 68 -> 75 | 0.39507  |
| 26 | 5.8381 | 212.37 | f=0.0000 | 63 -> 70 | -0.13992 |
|    |        |        |          | 64 -> 71 | 0.32197  |
|    |        |        |          | 66 -> 72 | 0.30600  |
|    |        |        |          | 66 -> 73 | 0.11113  |
|    |        |        |          | 67 -> 73 | 0.21304  |
|    |        |        |          | 67 -> 74 | -0.26239 |
|    |        |        |          | 69 -> 73 | 0.11958  |
|    |        |        |          | 69 -> 75 | 0.28928  |
| 27 | 5.8973 | 210.24 | f=0.0000 | 60 -> 70 | 0.41338  |
|    |        |        |          | 64 -> 71 | 0.26796  |
|    |        |        |          | 66 -> 72 | -0.25287 |
|    |        |        |          | 66 -> 74 | 0.13577  |
|    |        |        |          | 66 -> 75 | 0.10967  |
|    |        |        |          | 67 -> 73 | -0.12517 |
|    |        |        |          | 67 -> 74 | -0.29176 |
| 28 | 5.9694 | 207.70 | f=0.0000 | 60 -> 70 | 0.20731  |
|    |        |        |          | 63 -> 72 | 0.11755  |

|    |        |        |          |          |          |
|----|--------|--------|----------|----------|----------|
|    |        |        |          | 65 -> 72 | -0.11313 |
|    |        |        |          | 65 -> 73 | 0.14171  |
|    |        |        |          | 66 -> 72 | 0.38863  |
|    |        |        |          | 66 -> 73 | -0.35639 |
|    |        |        |          | 67 -> 72 | -0.19019 |
|    |        |        |          | 69 -> 75 | -0.16937 |
| 29 | 5.9728 | 207.58 | f=0.0000 | 61 -> 70 | 0.38194  |
|    |        |        |          | 62 -> 70 | -0.23356 |
|    |        |        |          | 68 -> 75 | 0.50486  |
| 30 | 6.1169 | 202.69 | f=0.0000 | 55 -> 70 | 0.13959  |
|    |        |        |          | 57 -> 70 | 0.11725  |
|    |        |        |          | 58 -> 70 | 0.22562  |
|    |        |        |          | 59 -> 70 | -0.21387 |
|    |        |        |          | 61 -> 70 | -0.13647 |
|    |        |        |          | 62 -> 70 | -0.14588 |
|    |        |        |          | 68 -> 73 | -0.10702 |
|    |        |        |          | 68 -> 74 | 0.52518  |
|    |        |        |          | 68 -> 75 | 0.11684  |

**Table S7. 30 TDDFT singlet excitations of azo 4 from *trans*-S<sub>0</sub> geometry, B3LYP/6-311G(d,p)/PCM(ACN)**

| Excited States | Energy (eV) | Wavelength (nm) | Oscillator Strength | Transition | Transition Contribution |
|----------------|-------------|-----------------|---------------------|------------|-------------------------|
| 1              | 2.6910      | 460.74          | f=0.0000            | 72 -> 74   | 0.70046                 |
| 2              | 2.8285      | 438.33          | f=1.3883            | 73 -> 74   | 0.70633                 |
| 3              | 3.4335      | 361.10          | f=0.0058            | 70 -> 74   | 0.13825                 |
|                |             |                 |                     | 71 -> 74   | 0.57863                 |
|                |             |                 |                     | 73 -> 75   | 0.36247                 |
| 4              | 3.7700      | 328.87          | f=0.0499            | 71 -> 74   | -0.35410                |
|                |             |                 |                     | 73 -> 75   | 0.59997                 |
| 5              | 4.0847      | 303.53          | f=0.0712            | 69 -> 74   | 0.14937                 |
|                |             |                 |                     | 70 -> 74   | 0.62028                 |
|                |             |                 |                     | 71 -> 74   | -0.14119                |
|                |             |                 |                     | 71 -> 75   | 0.15039                 |
|                |             |                 |                     | 73 -> 76   | 0.17036                 |
|                |             |                 |                     | 73 -> 77   | 0.11151                 |
| 6              | 4.1562      | 298.31          | f=0.0149            | 69 -> 74   | 0.52802                 |
|                |             |                 |                     | 70 -> 74   | -0.18197                |
|                |             |                 |                     | 73 -> 76   | 0.38860                 |
|                |             |                 |                     | 73 -> 77   | -0.15091                |
| 7              | 4.2616      | 290.93          | f=0.0000            | 72 -> 75   | 0.69874                 |
| 8              | 4.4767      | 276.96          | f=0.0850            | 69 -> 74   | -0.42080                |
|                |             |                 |                     | 71 -> 75   | -0.11598                |
|                |             |                 |                     | 73 -> 76   | 0.53980                 |
| 9              | 4.5796      | 270.73          | f=0.2581            | 69 -> 74   | -0.10185                |
|                |             |                 |                     | 71 -> 75   | 0.59195                 |
|                |             |                 |                     | 73 -> 77   | -0.33410                |
| 10             | 4.8244      | 257.00          | f=0.0165            | 68 -> 74   | 0.11499                 |
|                |             |                 |                     | 70 -> 74   | -0.17549                |
|                |             |                 |                     | 70 -> 75   | -0.40695                |
|                |             |                 |                     | 71 -> 75   | 0.20817                 |
|                |             |                 |                     | 71 -> 76   | 0.11152                 |
|                |             |                 |                     | 71 -> 77   | 0.18465                 |
|                |             |                 |                     | 73 -> 77   | 0.41685                 |
| 11             | 5.0193      | 247.01          | f=0.0000            | 72 -> 76   | 0.70385                 |
| 12             | 5.0331      | 246.34          | f=0.0975            | 68 -> 74   | 0.49754                 |
|                |             |                 |                     | 70 -> 75   | 0.30619                 |
|                |             |                 |                     | 71 -> 76   | -0.11820                |
|                |             |                 |                     | 71 -> 77   | -0.13505                |
|                |             |                 |                     | 73 -> 77   | 0.21067                 |
|                |             |                 |                     | 73 -> 78   | -0.20756                |

|    |        |        |          |          |          |
|----|--------|--------|----------|----------|----------|
| 13 | 5.1556 | 240.49 | f=0.0360 | 67 -> 74 | -0.21359 |
|    |        |        |          | 68 -> 74 | 0.32798  |
|    |        |        |          | 70 -> 75 | -0.23248 |
|    |        |        |          | 71 -> 75 | -0.18437 |
|    |        |        |          | 71 -> 76 | 0.19406  |
|    |        |        |          | 71 -> 77 | 0.24980  |
|    |        |        |          | 73 -> 77 | -0.32440 |
|    |        |        |          | 73 -> 78 | -0.15948 |
| 14 | 5.2709 | 235.22 | f=0.0003 | 72 -> 77 | 0.69648  |
| 15 | 5.2977 | 234.03 | f=0.0277 | 67 -> 74 | 0.45737  |
|    |        |        |          | 68 -> 74 | 0.28688  |
|    |        |        |          | 73 -> 78 | 0.38927  |
|    |        |        |          | 73 -> 79 | 0.10012  |
| 16 | 5.4604 | 227.06 | f=0.0067 | 67 -> 74 | -0.38973 |
|    |        |        |          | 71 -> 76 | -0.30147 |
|    |        |        |          | 73 -> 78 | 0.47240  |
| 17 | 5.4829 | 226.13 | f=0.0261 | 67 -> 74 | -0.22461 |
|    |        |        |          | 71 -> 76 | 0.54738  |
|    |        |        |          | 71 -> 77 | -0.26914 |
|    |        |        |          | 73 -> 78 | 0.19811  |
| 18 | 5.5752 | 222.38 | f=0.0054 | 69 -> 75 | 0.70308  |
| 19 | 5.7727 | 214.78 | f=0.0200 | 73 -> 80 | 0.69828  |
| 20 | 5.7928 | 214.03 | f=0.2482 | 67 -> 75 | -0.11010 |
|    |        |        |          | 68 -> 75 | 0.34820  |
|    |        |        |          | 70 -> 75 | -0.27951 |
|    |        |        |          | 71 -> 77 | -0.34905 |
|    |        |        |          | 71 -> 78 | 0.27420  |
|    |        |        |          | 73 -> 79 | 0.20346  |
| 21 | 5.8665 | 211.34 | f=0.0481 | 68 -> 75 | -0.17803 |
|    |        |        |          | 69 -> 76 | -0.10220 |
|    |        |        |          | 70 -> 77 | 0.11002  |
|    |        |        |          | 71 -> 78 | -0.15926 |
|    |        |        |          | 73 -> 79 | 0.61831  |
| 22 | 5.9861 | 207.12 | f=0.0618 | 68 -> 75 | -0.10098 |
|    |        |        |          | 70 -> 76 | 0.63063  |
|    |        |        |          | 70 -> 77 | -0.10983 |
|    |        |        |          | 71 -> 77 | -0.14857 |
|    |        |        |          | 71 -> 78 | -0.15008 |
| 23 | 6.0150 | 206.13 | f=0.4582 | 66 -> 74 | -0.11072 |
|    |        |        |          | 67 -> 75 | -0.21897 |
|    |        |        |          | 68 -> 75 | 0.14071  |
|    |        |        |          | 70 -> 75 | 0.24958  |
|    |        |        |          | 70 -> 76 | 0.25480  |



|    |        |        |          |          |          |
|----|--------|--------|----------|----------|----------|
|    |        |        |          | 71 -> 76 | 0.10754  |
|    |        |        |          | 71 -> 77 | 0.32025  |
|    |        |        |          | 71 -> 78 | 0.35505  |
|    |        |        |          | 73 -> 79 | 0.14476  |
| 24 | 6.0298 | 205.62 | f=0.0001 | 64 -> 74 | 0.21323  |
|    |        |        |          | 65 -> 74 | 0.38456  |
|    |        |        |          | 72 -> 78 | 0.53019  |
| 25 | 6.0564 | 204.72 | f=0.0007 | 64 -> 74 | 0.21525  |
|    |        |        |          | 65 -> 74 | 0.48110  |
|    |        |        |          | 72 -> 78 | -0.45314 |
| 26 | 6.1206 | 202.57 | f=0.0000 | 64 -> 74 | 0.58411  |
|    |        |        |          | 65 -> 74 | -0.30192 |
|    |        |        |          | 72 -> 79 | -0.21247 |
| 27 | 6.2540 | 198.25 | f=0.0449 | 66 -> 74 | 0.57032  |
|    |        |        |          | 67 -> 75 | -0.10729 |
|    |        |        |          | 68 -> 75 | -0.14032 |
|    |        |        |          | 69 -> 76 | -0.13682 |
|    |        |        |          | 70 -> 77 | 0.30847  |
|    |        |        |          | 71 -> 78 | 0.12054  |
| 28 | 6.2740 | 197.61 | f=0.0003 | 64 -> 74 | 0.22376  |
|    |        |        |          | 72 -> 79 | 0.65922  |
| 29 | 6.2887 | 197.15 | f=0.1035 | 66 -> 74 | 0.27650  |
|    |        |        |          | 67 -> 75 | 0.12027  |
|    |        |        |          | 68 -> 74 | -0.11656 |
|    |        |        |          | 68 -> 75 | 0.41406  |
|    |        |        |          | 70 -> 77 | -0.20248 |
|    |        |        |          | 71 -> 77 | 0.20208  |
|    |        |        |          | 71 -> 78 | -0.28522 |
|    |        |        |          | 71 -> 79 | -0.11870 |
| 30 | 6.3695 | 194.65 | f=0.0012 | 71 -> 81 | 0.12957  |
|    |        |        |          | 73 -> 81 | 0.63531  |
|    |        |        |          | 73 -> 83 | 0.25176  |

**Table S8. 30 TDDFT triplet excitations of azo 4 from *trans*-S<sub>0</sub> geometry, B3LYP/6-311G(d,p)/PCM(ACN)**

| Excited States | Energy (eV) | Wavelength (nm) | Oscillator Strength | Transition | Transition Contribution |
|----------------|-------------|-----------------|---------------------|------------|-------------------------|
| 1              | 1.7291      | 717.04          | f=0.0000            | 73 -> 74   | 0.68457                 |
| 2              | 1.9977      | 620.63          | f=0.0000            | 72 -> 74   | 0.68226                 |
|                |             |                 |                     | 72 -> 79   | -0.13709                |
| 3              | 2.7098      | 457.55          | f=0.0000            | 70 -> 74   | -0.16693                |
|                |             |                 |                     | 71 -> 74   | 0.50401                 |
|                |             |                 |                     | 71 -> 75   | -0.32659                |
|                |             |                 |                     | 73 -> 75   | -0.26317                |
|                |             |                 |                     | 73 -> 77   | 0.10290                 |
| 4              | 3.2218      | 384.83          | f=0.0000            | 71 -> 74   | 0.43174                 |
|                |             |                 |                     | 71 -> 75   | 0.42420                 |
|                |             |                 |                     | 73 -> 75   | 0.30935                 |
| 5              | 3.4062      | 364.00          | f=0.0000            | 70 -> 74   | 0.58834                 |
|                |             |                 |                     | 70 -> 75   | 0.12110                 |
|                |             |                 |                     | 71 -> 74   | 0.17351                 |
|                |             |                 |                     | 73 -> 75   | -0.23356                |
| 6              | 3.5476      | 349.49          | f=0.0000            | 70 -> 74   | 0.23873                 |
|                |             |                 |                     | 70 -> 75   | -0.24883                |
|                |             |                 |                     | 71 -> 75   | -0.32559                |
|                |             |                 |                     | 73 -> 75   | 0.46234                 |
|                |             |                 |                     | 73 -> 76   | -0.18625                |
| 7              | 3.6586      | 338.89          | f=0.0000            | 69 -> 74   | 0.16658                 |
|                |             |                 |                     | 70 -> 74   | 0.10853                 |
|                |             |                 |                     | 73 -> 75   | 0.11779                 |
|                |             |                 |                     | 73 -> 76   | 0.59769                 |
|                |             |                 |                     | 73 -> 77   | -0.22462                |
| 8              | 3.7929      | 326.88          | f=0.0000            | 69 -> 74   | 0.61740                 |
|                |             |                 |                     | 69 -> 76   | -0.18702                |
|                |             |                 |                     | 73 -> 76   | -0.21572                |
| 9              | 3.9955      | 310.31          | f=0.0000            | 68 -> 74   | -0.29412                |
|                |             |                 |                     | 69 -> 74   | 0.22093                 |
|                |             |                 |                     | 69 -> 76   | 0.22044                 |
|                |             |                 |                     | 69 -> 77   | -0.10697                |
|                |             |                 |                     | 70 -> 77   | -0.12109                |
|                |             |                 |                     | 71 -> 77   | 0.11755                 |
|                |             |                 |                     | 71 -> 78   | -0.10708                |
|                |             |                 |                     | 73 -> 74   | 0.10217                 |
|                |             |                 |                     | 73 -> 76   | 0.11719                 |
|                |             |                 |                     | 73 -> 77   | 0.42941                 |

|    |        |        |          |          |          |
|----|--------|--------|----------|----------|----------|
| 10 | 4.1631 | 297.82 | f=0.0000 | 67 -> 74 | -0.12403 |
|    |        |        |          | 67 -> 75 | 0.16235  |
|    |        |        |          | 68 -> 74 | 0.27386  |
|    |        |        |          | 68 -> 75 | -0.21649 |
|    |        |        |          | 69 -> 76 | 0.20368  |
|    |        |        |          | 70 -> 75 | -0.20582 |
|    |        |        |          | 71 -> 77 | -0.14707 |
|    |        |        |          | 71 -> 78 | 0.24589  |
|    |        |        |          | 73 -> 77 | 0.15515  |
|    |        |        |          | 73 -> 78 | 0.21869  |
|    |        |        |          | 73 -> 79 | -0.22340 |
| 11 | 4.2018 | 295.07 | f=0.0000 | 72 -> 74 | -0.11479 |
|    |        |        |          | 72 -> 75 | 0.68617  |
| 12 | 4.4387 | 279.32 | f=0.0000 | 67 -> 74 | -0.24299 |
|    |        |        |          | 67 -> 75 | 0.14445  |
|    |        |        |          | 68 -> 74 | -0.20365 |
|    |        |        |          | 69 -> 76 | 0.24656  |
|    |        |        |          | 70 -> 75 | 0.33442  |
|    |        |        |          | 71 -> 75 | -0.13051 |
|    |        |        |          | 71 -> 78 | 0.19699  |
|    |        |        |          | 73 -> 75 | 0.13838  |
|    |        |        |          | 73 -> 77 | -0.25451 |
|    |        |        |          | 73 -> 79 | 0.11690  |
| 13 | 4.4659 | 277.62 | f=0.0000 | 67 -> 74 | 0.21483  |
|    |        |        |          | 67 -> 75 | -0.10078 |
|    |        |        |          | 68 -> 74 | 0.16722  |
|    |        |        |          | 68 -> 75 | 0.18095  |
|    |        |        |          | 69 -> 76 | 0.32695  |
|    |        |        |          | 69 -> 77 | -0.11904 |
|    |        |        |          | 70 -> 75 | 0.16577  |
|    |        |        |          | 70 -> 76 | 0.10685  |
|    |        |        |          | 70 -> 77 | 0.15578  |
|    |        |        |          | 71 -> 75 | -0.10152 |
|    |        |        |          | 71 -> 78 | -0.18781 |
|    |        |        |          | 73 -> 77 | -0.12707 |
|    |        |        |          | 73 -> 78 | -0.11590 |
|    |        |        |          | 73 -> 79 | -0.29602 |
| 14 | 4.5039 | 275.28 | f=0.0000 | 67 -> 75 | 0.13341  |
|    |        |        |          | 68 -> 74 | 0.21678  |
|    |        |        |          | 69 -> 76 | -0.22996 |
|    |        |        |          | 70 -> 75 | 0.42104  |
|    |        |        |          | 71 -> 75 | -0.17921 |
|    |        |        |          | 73 -> 75 | 0.12928  |

|    |        |        |          |          |          |
|----|--------|--------|----------|----------|----------|
| 15 | 4.8975 | 253.16 | f=0.0000 | 73 -> 76 | 0.11381  |
|    |        |        |          | 73 -> 77 | 0.26847  |
|    |        |        |          | 66 -> 75 | -0.10770 |
|    |        |        |          | 67 -> 74 | 0.33447  |
|    |        |        |          | 67 -> 75 | 0.19360  |
|    |        |        |          | 69 -> 76 | 0.13558  |
|    |        |        |          | 70 -> 75 | -0.12531 |
|    |        |        |          | 70 -> 78 | 0.10244  |
|    |        |        |          | 71 -> 76 | 0.21823  |
|    |        |        |          | 71 -> 77 | 0.36649  |
|    |        |        |          | 71 -> 78 | 0.18002  |
| 16 | 4.9786 | 249.04 | f=0.0000 | 71 -> 79 | 0.12502  |
|    |        |        |          | 67 -> 74 | -0.27939 |
|    |        |        |          | 68 -> 74 | 0.38507  |
|    |        |        |          | 69 -> 76 | 0.17075  |
|    |        |        |          | 71 -> 76 | 0.16197  |
|    |        |        |          | 71 -> 77 | 0.28440  |
|    |        |        |          | 71 -> 78 | -0.11565 |
|    |        |        |          | 73 -> 78 | -0.10887 |
|    |        |        |          | 73 -> 79 | 0.25503  |
| 17 | 4.9853 | 248.70 | f=0.0000 | 72 -> 76 | 0.70167  |
| 18 | 5.1574 | 240.40 | f=0.0000 | 72 -> 77 | 0.68312  |
| 19 | 5.1574 | 240.40 | f=0.0000 | 66 -> 74 | -0.12633 |
|    |        |        |          | 67 -> 74 | -0.13333 |
|    |        |        |          | 67 -> 75 | -0.15978 |
|    |        |        |          | 68 -> 74 | -0.11763 |
|    |        |        |          | 69 -> 76 | -0.11137 |
|    |        |        |          | 70 -> 77 | 0.21036  |
|    |        |        |          | 70 -> 78 | -0.18568 |
|    |        |        |          | 71 -> 76 | 0.19970  |
|    |        |        |          | 71 -> 77 | 0.21713  |
|    |        |        |          | 73 -> 77 | -0.10607 |
|    |        |        |          | 73 -> 78 | 0.39294  |
|    |        |        |          | 73 -> 79 | -0.19050 |
| 20 | 5.1839 | 239.17 | f=0.0000 | 66 -> 74 | 0.14303  |
|    |        |        |          | 66 -> 75 | 0.11514  |
|    |        |        |          | 67 -> 74 | 0.31857  |
|    |        |        |          | 67 -> 75 | -0.10355 |
|    |        |        |          | 69 -> 76 | 0.11849  |
|    |        |        |          | 70 -> 76 | -0.12871 |
|    |        |        |          | 70 -> 77 | -0.18214 |
|    |        |        |          | 70 -> 78 | -0.15568 |
|    |        |        |          | 70 -> 79 | -0.10076 |

|    |        |        |          |          |          |
|----|--------|--------|----------|----------|----------|
| 21 | 5.3700 | 230.89 | f=0.0000 | 73 -> 78 | 0.40446  |
|    |        |        |          | 73 -> 79 | 0.20627  |
|    |        |        |          | 70 -> 76 | -0.29034 |
|    |        |        |          | 70 -> 77 | -0.12057 |
|    |        |        |          | 71 -> 76 | 0.50382  |
|    |        |        |          | 71 -> 77 | -0.22477 |
|    |        |        |          | 73 -> 77 | -0.11959 |
| 22 | 5.4299 | 228.34 | f=0.0000 | 73 -> 79 | -0.17857 |
|    |        |        |          | 66 -> 74 | -0.14857 |
|    |        |        |          | 68 -> 77 | 0.11281  |
|    |        |        |          | 70 -> 77 | 0.36654  |
|    |        |        |          | 71 -> 76 | 0.19240  |
|    |        |        |          | 71 -> 77 | -0.25622 |
|    |        |        |          | 73 -> 76 | 0.10274  |
|    |        |        |          | 73 -> 77 | 0.16181  |
|    |        |        |          | 73 -> 79 | 0.31155  |
| 23 | 5.5638 | 222.84 | f=0.0000 | 69 -> 75 | 0.69308  |
| 24 | 5.6020 | 221.32 | f=0.0000 | 66 -> 74 | 0.48027  |
|    |        |        |          | 66 -> 75 | -0.13364 |
|    |        |        |          | 67 -> 74 | -0.14213 |
|    |        |        |          | 68 -> 75 | 0.25352  |
|    |        |        |          | 70 -> 75 | -0.10073 |
|    |        |        |          | 70 -> 76 | 0.13208  |
|    |        |        |          | 70 -> 77 | 0.17902  |
|    |        |        |          | 70 -> 78 | 0.11084  |
|    |        |        |          | 71 -> 77 | -0.13098 |
|    |        |        |          | 71 -> 79 | 0.10888  |
| 25 | 5.6896 | 217.91 | f=0.0000 | 73 -> 80 | 0.69208  |
| 26 | 5.7514 | 215.57 | f=0.0000 | 66 -> 74 | -0.27467 |
|    |        |        |          | 66 -> 75 | -0.16197 |
|    |        |        |          | 68 -> 75 | 0.44754  |
|    |        |        |          | 70 -> 77 | -0.11969 |
|    |        |        |          | 70 -> 78 | 0.19427  |
|    |        |        |          | 71 -> 78 | 0.22414  |
|    |        |        |          | 73 -> 78 | 0.10824  |
|    |        |        |          | 73 -> 79 | 0.11061  |
| 27 | 5.8349 | 212.49 | f=0.0000 | 62 -> 74 | 0.28768  |
|    |        |        |          | 64 -> 74 | 0.27403  |
|    |        |        |          | 65 -> 74 | 0.51776  |
|    |        |        |          | 72 -> 79 | 0.17016  |
| 28 | 5.8458 | 212.09 | f=0.0000 | 67 -> 76 | -0.13017 |
|    |        |        |          | 68 -> 76 | -0.17138 |
|    |        |        |          | 70 -> 76 | 0.51624  |

|    |        |        |          |          |          |
|----|--------|--------|----------|----------|----------|
| 29 | 5.9161 | 209.57 | f=0.0000 | 70 -> 77 | -0.28415 |
|    |        |        |          | 71 -> 76 | 0.23075  |
|    |        |        |          | 66 -> 75 | 0.20731  |
|    |        |        |          | 67 -> 75 | -0.29817 |
|    |        |        |          | 67 -> 77 | -0.10669 |
|    |        |        |          | 68 -> 77 | 0.10815  |
|    |        |        |          | 70 -> 78 | -0.11253 |
|    |        |        |          | 71 -> 77 | 0.10513  |
|    |        |        |          | 71 -> 78 | 0.45697  |
|    |        |        |          | 71 -> 88 | -0.11147 |
| 30 | 5.9253 | 209.25 | f=0.0000 | 73 -> 78 | -0.18935 |
|    |        |        |          | 64 -> 74 | -0.38885 |
|    |        |        |          | 72 -> 74 | 0.11719  |
|    |        |        |          | 72 -> 79 | 0.55246  |

Azo 1 and 4 PECs

**Table S9. TDDFT Energies of 1 along the torsional  $\angle$  CNNC of the  $S_0$  trans-cis isomerization.**

| $\angle$ CNNC | $S_0$   | $S_1$   | $S_2$   | $S_3$   | $S_4$   | $T_1$   | $T_2$   | $T_3$   |
|---------------|---------|---------|---------|---------|---------|---------|---------|---------|
| 0             | 0.6663  | 3.3144  | 4.0862  | 4.5866  | 4.7494  | 2.51406 | 3.2731  | 3.8548  |
| 12.5          | 0.64208 | 3.17168 | 4.00338 | 4.51338 | 4.66048 | 2.3799  | 3.23648 | 3.78248 |
| 20            | 0.66461 | 3.02141 | 3.94311 | 4.46951 | 4.59221 | 2.22431 | 3.23061 | 3.74261 |
| 40            | 0.84949 | 2.70399 | 3.89629 | 4.46129 | 4.52429 | 1.8738  | 3.29099 | 3.74819 |
| 60            | 1.21804 | 2.40344 | 3.97004 | 4.53754 | 4.60044 | 1.55233 | 3.41754 | 3.87784 |
| 80            | 1.73256 | 2.07566 | 4.16366 | 4.69526 | 4.78996 | 1.34623 | 3.59416 | 4.12066 |
| 100           | 1.78436 | 1.92616 | 4.14226 | 4.67896 | 4.78486 | 1.28726 | 3.56126 | 4.08316 |
| 120           | 1.08976 | 2.18636 | 3.79826 | 4.37776 | 4.46926 | 1.33757 | 3.18656 | 3.65146 |
| 140           | 0.51092 | 2.32702 | 3.51822 | 4.03042 | 4.22882 | 1.51442 | 2.77852 | 3.28082 |
| 160           | 0.13203 | 2.49103 | 3.31343 | 3.71473 | 4.07953 | 1.75641 | 2.39573 | 3.01173 |
| 180           | 0       | 2.5901  | 3.1998  | 3.5612  | 4.0233  | 1.95612 | 2.066   | 2.8976  |

**Table S10. TDDFT Energies of 1 along the inversion  $\angle$   $^{Nap}$ CNN of the  $S_0$  trans-cis isomerization.**

| $\angle$ CNN | $S_0$   | $S_1$   | $S_2$   | $S_3$   | $S_4$   | $T_1$   | $T_2$   | $T_3$   |
|--------------|---------|---------|---------|---------|---------|---------|---------|---------|
| 115.31275    | 0       | 2.5901  | 3.1998  | 3.5612  | 4.0233  | 1.95612 | 2.066   | 2.8976  |
| 125.31275    | 0.143   | 2.3563  | 3.3868  | 3.7309  | 4.1617  | 1.76337 | 2.2295  | 3.0461  |
| 135.31275    | 0.49874 | 2.30834 | 3.76624 | 4.09654 | 4.11444 | 1.7505  | 2.59164 | 3.40294 |
| 145.31275    | 0.96298 | 2.37868 | 4.19988 | 4.23518 | 4.55158 | 1.84885 | 3.04778 | 3.85908 |
| 155.31275    | 1.29596 | 2.68756 | 4.41256 | 4.65906 | 5.07046 | 2.02201 | 3.80246 | 4.05316 |
| 165.31275    | 1.55932 | 2.70242 | 4.62462 | 4.78412 | 5.12972 | 2.13361 | 3.94552 | 4.38262 |
| 175.31275    | 1.69346 | 2.71876 | 4.73116 | 4.84436 | 5.17076 | 2.19867 | 4.02606 | 4.56286 |
| 185.70759    | 1.68164 | 2.77164 | 4.73704 | 4.85564 | 5.19434 | 2.23471 | 4.03154 | 4.54404 |
| 195.70759    | 1.5329  | 2.8411  | 4.6436  | 4.8113  | 5.1955  | 2.23832 | 3.9622  | 4.3701  |
| 205.70759    | 1.3215  | 2.8245  | 4.4719  | 4.7035  | 5.2075  | 2.19083 | 3.8004  | 4.1355  |
| 215.70759    | 1.02312 | 2.92782 | 4.29392 | 4.56312 | 4.94642 | 2.16057 | 3.57342 | 3.95622 |
| 225.70759    | 0.75291 | 3.02061 | 4.11771 | 4.51431 | 4.68671 | 2.23982 | 3.32741 | 3.81341 |
| 235.70759    | 0.64208 | 3.17168 | 4.00338 | 4.51338 | 4.66048 | 2.3799  | 3.23648 | 3.78248 |

**Table S11. TDDFT Energies of 4 along the torsional  $\angle$  CNNC of the  $S_0$  trans-cis isomerization.**

| $\angle$ CNNC | $S_0$   | $S_1$   | $S_2$   | $S_3$   | $S_4$   | $T_1$   | $T_2$   | $T_3$   |
|---------------|---------|---------|---------|---------|---------|---------|---------|---------|
| 0             | 0.70521 | 3.35865 | 4.04125 | 4.30095 | 4.37695 | 2.60808 | 3.02625 | 3.39515 |
| 11.8          | 0.67873 | 3.14503 | 3.93753 | 4.16893 | 4.28413 | 2.3822  | 3.05123 | 3.34563 |
| 20            | 0.69318 | 3.00593 | 3.90103 | 4.10463 | 4.24373 | 2.22763 | 3.04673 | 3.33733 |
| 40            | 0.8512  | 2.68245 | 3.89925 | 4.03335 | 4.21885 | 1.85745 | 3.03765 | 3.38805 |
| 60            | 1.17673 | 2.37866 | 3.98386 | 4.13726 | 4.29866 | 1.54501 | 3.08026 | 3.51366 |
| 80            | 1.5929  | 2.04181 | 4.06391 | 4.41951 | 4.54991 | 1.41921 | 3.09761 | 3.70961 |
| 100           | 1.59467 | 1.94654 | 4.00034 | 4.35374 | 4.55034 | 1.32541 | 3.07074 | 3.63914 |
| 120           | 1.0176  | 2.16728 | 3.82248 | 3.88688 | 4.16998 | 1.31377 | 2.87198 | 3.30998 |
| 140           | 0.48662 | 2.31049 | 3.44969 | 3.61399 | 3.92369 | 1.46226 | 2.56479 | 3.00289 |
| 160           | 0.12564 | 2.49175 | 3.08845 | 3.47715 | 3.79165 | 1.68999 | 2.23945 | 2.78285 |
| 180           | 0       | 2.69088 | 2.82838 | 3.43338 | 3.76988 | 1.92257 | 1.99758 | 2.70968 |

**Table S12. TDDFT Energies of 4 along the inversion  $\angle$   $^{Nap}$  CNN of the  $S_0$  trans-cis isomerization.**

| $\angle$ CNN | $S_0$   | $S_1$   | $S_2$   | $S_3$   | $S_4$   | $T_1$   | $T_2$   | $T_3$   |
|--------------|---------|---------|---------|---------|---------|---------|---------|---------|
| 114.92501    | 0       | 2.69088 | 2.82838 | 3.43338 | 3.76988 | 1.92257 | 1.99758 | 2.70968 |
| 124.92501    | 0.14087 | 2.45597 | 2.94457 | 3.58057 | 3.90817 | 2.06522 | 2.25477 | 2.79817 |
| 134.92501    | 0.49808 | 2.39808 | 3.27028 | 3.93798 | 3.98688 | 1.87429 | 2.22688 | 3.19738 |
| 144.92501    | 0.9724  | 2.4667  | 3.7056  | 4.0828  | 4.4033  | 1.97403 | 2.6846  | 3.6594  |
| 154.92501    | 1.45703 | 2.60243 | 4.14693 | 4.25933 | 4.86913 | 2.12862 | 3.14353 | 4.12333 |
| 164.92501    | 1.50093 | 2.81313 | 4.54833 | 4.76003 | 4.88703 | 2.28981 | 3.53753 | 3.78893 |
| 174.92501    | 1.63494 | 2.85574 | 4.64544 | 4.89074 | 4.95794 | 2.35321 | 3.66254 | 3.88444 |
| 185.56884    | 1.62937 | 2.90577 | 4.65627 | 4.88857 | 4.97597 | 2.39178 | 3.67167 | 3.89287 |
| 195.56884    | 1.49138 | 2.95618 | 4.58388 | 4.77398 | 4.92718 | 2.40375 | 3.56648 | 3.81648 |
| 205.56884    | 1.25657 | 3.01597 | 4.43567 | 4.56487 | 4.81367 | 2.39011 | 3.36407 | 3.70547 |
| 215.56884    | 0.99172 | 3.07082 | 4.24592 | 4.39562 | 4.64252 | 2.40419 | 3.14022 | 3.55832 |
| 225.56884    | 0.77757 | 3.05847 | 4.00357 | 4.22837 | 4.40457 | 2.34187 | 2.98397 | 3.41337 |
| 235.56884    | 0.67873 | 3.14503 | 3.93753 | 4.16893 | 4.28413 | 2.3822  | 3.05123 | 3.34563 |



Spin orbit coupling

**Table S13. Spin-orbit coupling constants between  $S_0 - S_3$  and  $T_1 - T_3$  states of azo 1 – 4 based on *trans*- $S_0$  geometry, B3LYP/6-311G(d,p)/PCM(ACN)**

| Azo | $\langle S_0 T_1 \rangle$ | $\langle S_0 T_2 \rangle$ | $\langle S_0 T_3 \rangle$ | $\langle S_1 T_1 \rangle$ | $\langle S_1 T_2 \rangle$ | $\langle S_1 T_3 \rangle$ | $\langle S_2 T_1 \rangle$ | $\langle S_2 T_2 \rangle$ | $\langle S_2 T_3 \rangle$ | $\langle S_3 T_1 \rangle$ | $\langle S_3 T_2 \rangle$ | $\langle S_3 T_3 \rangle$ |
|-----|---------------------------|---------------------------|---------------------------|---------------------------|---------------------------|---------------------------|---------------------------|---------------------------|---------------------------|---------------------------|---------------------------|---------------------------|
| 1   | 38.26853                  | 0.09466                   | 0.23341                   | 0.67005                   | 0.97773                   | 3.19222                   | 1.8607                    | 0.30888                   | 0.09256                   | 0.08139                   | 0.34362                   | 0.30296                   |
| 2   | 38.01036                  | 0.15433                   | 0.24275                   | 0.64448                   | 0.99501                   | 4.46293                   | 0.56808                   | 0.18619                   | 0.14342                   | 2.81501                   | 0.373                     | 0.3607                    |
| 3   | 38.00044                  | 0.27693                   | 0.22314                   | 0.64169                   | 1.03517                   | 4.49483                   | 0.98353                   | 0.14815                   | 0.12537                   | 2.93505                   | 0.38605                   | 0.36101                   |
| 4   | 0.07262                   | 37.20543                  | 0.23629                   | 4.08464                   | 0.5765                    | 4.96978                   | 0.03365                   | 4.88025                   | 0.09716                   | 0.38383                   | 2.62068                   | 0.44084                   |

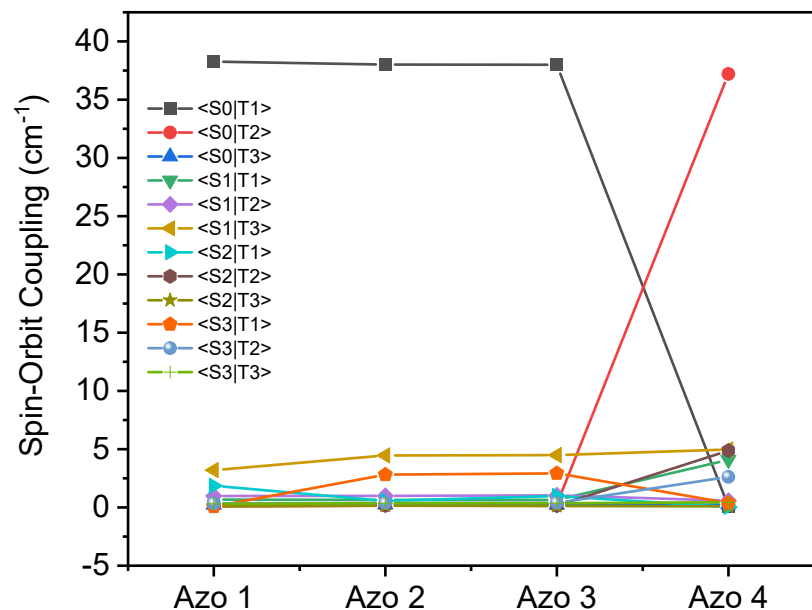

**Figure S41. Schematic demonstration of spin-orbit coupling constants between  $S_0 - S_3$  and  $T_1 - T_3$  states of azo 1 – 4 at the Franck-Condon geometry (*trans*-ground state).**

**Table S14. Spin-orbit coupling constants between  $S_0 - S_3$  and  $T_1 - T_3$  states of azo 1 at various CNNC dihedral angles and  $^{Nap}CNN$  angles B3LYP/6-311G(d,p)/PCM(ACN)**

| CNNC<br>(°) | <S0 T1>  | <S0 T2>  | <S0 T3>  | <S1 T1> | <S1 T2> | <S1 T3> | <S2 T1> | <S2 T2> | <S2 T3> | <S3 T1> | <S3 T2> | <S3 T3> |
|-------------|----------|----------|----------|---------|---------|---------|---------|---------|---------|---------|---------|---------|
| 180         | 38.26853 | 0.09466  | 0.23341  | 0.67005 | 0.97773 | 3.19222 | 1.8607  | 0.30888 | 0.09256 | 0.08139 | 0.34362 | 0.30296 |
| 160         | 29.76165 | 19.93581 | 6.32374  | 0.17817 | 2.01376 | 2.99342 | 1.76323 | 0.55536 | 1.04043 | 0.52897 | 0.52168 | 0.94756 |
| 140         | 27.60733 | 18.99826 | 11.24501 | 0.85671 | 3.2107  | 3.4154  | 2.12832 | 0.45221 | 1.27318 | 1.47445 | 0.67358 | 1.45162 |
| 120         | 25.04813 | 15.87024 | 15.2875  | 1.60865 | 4.31955 | 4.58588 | 2.64562 | 0.54922 | 1.38318 | 1.53405 | 0.45099 | 0.95396 |
| 100         | 20.86065 | 11.96904 | 17.24155 | 2.6265  | 5.87262 | 6.27925 | 3.05994 | 0.78023 | 1.55173 | 2.74762 | 0.34002 | 0.85845 |
| 80          | 24.47178 | 9.73717  | 17.24687 | 0.9538  | 6.33755 | 5.88554 | 4.74192 | 0.79992 | 1.12796 | 3.13587 | 0.37657 | 1.00401 |
| 60          | 26.2458  | 11.27016 | 16.55502 | 0.32751 | 4.78686 | 4.16332 | 4.21915 | 0.71428 | 0.90959 | 1.23107 | 0.43888 | 1.07313 |
| 40          | 28.06824 | 11.78501 | 15.39994 | 0.17961 | 4.05822 | 3.92862 | 4.06215 | 0.70358 | 0.9604  | 1.79006 | 0.2287  | 1.50276 |
| 20          | 30.66432 | 11.77563 | 14.29074 | 0.31356 | 3.40881 | 3.9588  | 4.03273 | 0.71192 | 1.28636 | 2.35203 | 0.347   | 1.51667 |
| 0           | 34.38816 | 10.28769 | 11.48083 | 0.50132 | 2.96497 | 3.56275 | 4.12195 | 0.99983 | 1.90088 | 2.20827 | 0.54525 | 1.37712 |
| $^{Nap}CNN$ | <S0 T1>  | <S0 T2>  | <S0 T3>  | <S1 T1> | <S1 T2> | <S1 T3> | <S2 T1> | <S2 T2> | <S2 T3> | <S3 T1> | <S3 T2> | <S3 T3> |
| 115.3128    | 38.26853 | 0.09466  | 0.23341  | 0.67005 | 0.97773 | 3.19222 | 1.8607  | 0.30888 | 0.09256 | 0.08139 | 0.34362 | 0.30296 |
| 125.3128    | 37.92442 | 0.17421  | 0.18694  | 0.55547 | 1.16276 | 3.37046 | 1.68705 | 0.33835 | 0.07776 | 0.46302 | 0.38426 | 0.29908 |
| 135.3128    | 37.59851 | 0.25657  | 0.13692  | 0.49367 | 1.58774 | 3.59581 | 1.68217 | 0.35619 | 0.06377 | 0.2298  | 1.01027 | 0.82279 |
| 145.3128    | 37.21648 | 0.33141  | 0.08903  | 0.46749 | 1.92031 | 3.82099 | 0.31351 | 1.09461 | 0.78591 | 1.75021 | 0.36475 | 0.03902 |
| 155.3128    | 34.80173 | 9.36614  | 5.75043  | 2.10293 | 6.0304  | 2.86412 | 4.04917 | 1.68494 | 0.36173 | 1.9257  | 0.77882 | 0.32439 |
| 165.3128    | 34.9655  | 3.71309  | 5.98885  | 1.71791 | 6.68535 | 4.90486 | 2.80294 | 1.38755 | 0.36616 | 2.19716 | 0.61815 | 0.38    |
| 175.3128    | 34.6055  | 0.74236  | 0.93823  | 0.57021 | 6.63687 | 5.51875 | 0.89013 | 1.27667 | 0.52537 | 2.81592 | 0.36445 | 0.07703 |
| 185.7076    | 34.01675 | 1.95527  | 5.0824   | 0.89422 | 6.38416 | 5.0684  | 1.06222 | 1.25364 | 0.54052 | 2.69652 | 0.43947 | 0.40055 |
| 195.7076    | 33.40299 | 4.97537  | 6.65892  | 1.61027 | 5.92891 | 4.57189 | 2.38189 | 1.34539 | 0.44236 | 2.29585 | 0.63854 | 0.38241 |
| 205.7076    | 34.1628  | 5.59615  | 3.01864  | 1.34403 | 4.33939 | 6.20149 | 1.74249 | 1.49701 | 0.47924 | 2.18254 | 0.80042 | 0.26309 |
| 215.7076    | 32.39563 | 12.37359 | 5.29632  | 0.86535 | 1.8974  | 3.92717 | 3.14122 | 1.3472  | 0.95387 | 0.5935  | 0.64597 | 0.49431 |
| 225.7076    | 32.37944 | 12.58835 | 9.27322  | 0.50035 | 2.16556 | 4.2598  | 3.40549 | 1.02143 | 1.26809 | 0.29921 | 0.90111 | 0.69279 |
| 235.7076    | 32.37474 | 11.35447 | 13.27777 | 0.40494 | 3.16142 | 3.8134  | 4.06409 | 0.80459 | 1.56505 | 2.32742 | 0.45139 | 1.44046 |

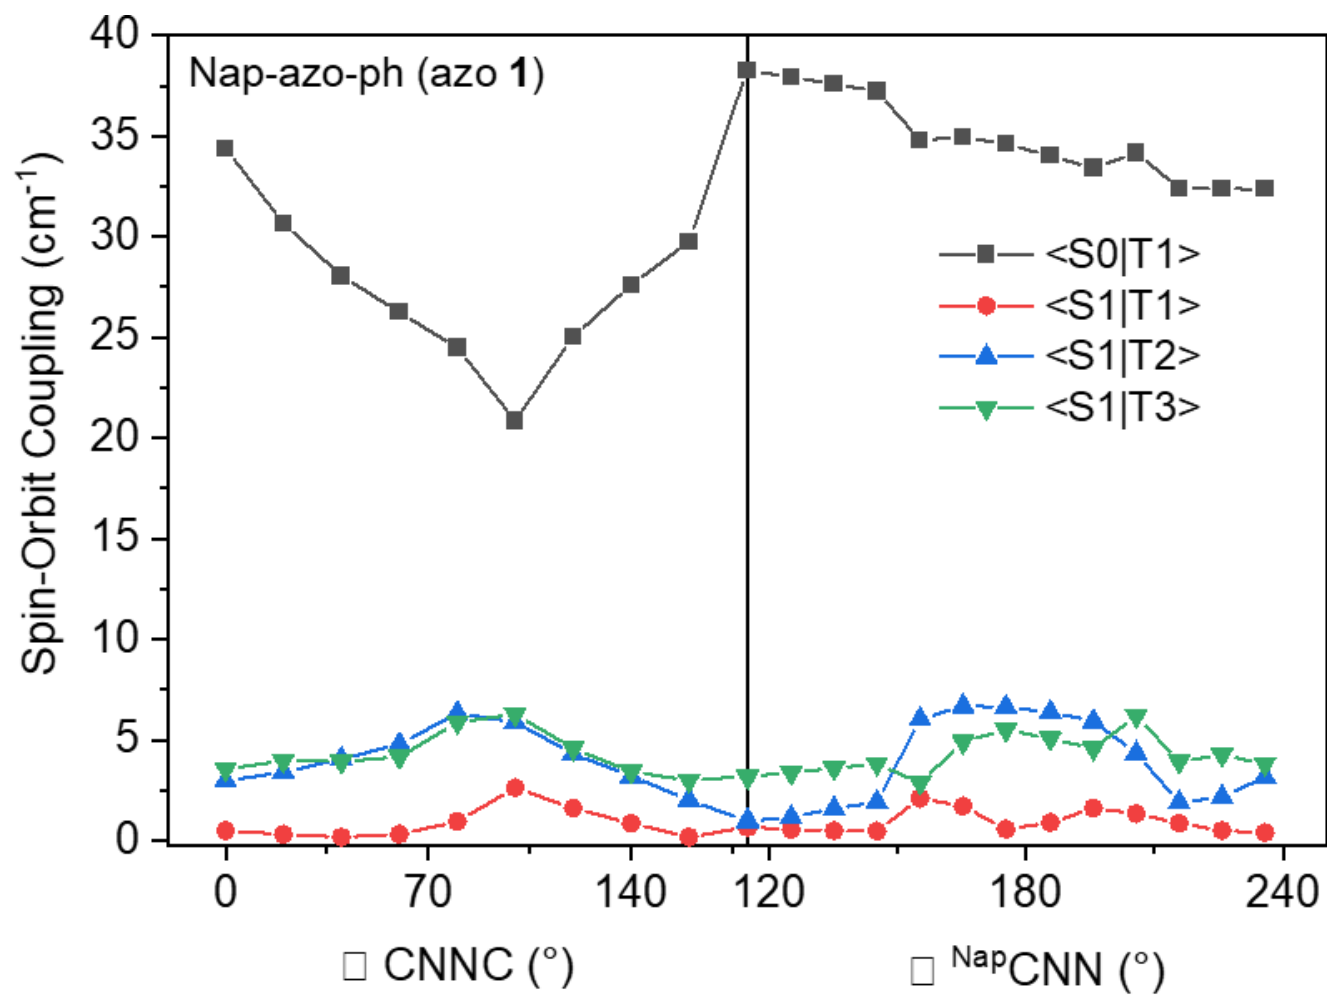

Figure S42. Schematic demonstration of spin-orbit coupling constants between  $S_0 - S_1$  and  $T_1 - T_3$  states of azo 1 at various CNNC dihedral angles and  $^{\text{Nap}}\text{CNN}$  angles.

**Table S15. Spin-orbit coupling constants between  $S_0 - S_3$  and  $T_1 - T_3$  states of azo 4 at various CNNC dihedral angles and  $^{Nap}CNN$  angles B3LYP/6-311G(d,p)/PCM(ACN)**

| CNNC<br>(°) | <S0 T1>  | <S0 T2>  | <S0 T3>  | <S1 T1> | <S1 T2>  | <S1 T3> | <S2 T1> | <S2 T2> | <S2 T3> | <S3 T1>  | <S3 T2> | <S3 T3> |
|-------------|----------|----------|----------|---------|----------|---------|---------|---------|---------|----------|---------|---------|
| 180         | 0.07262  | 37.20543 | 0.23629  | 4.08464 | 0.5765   | 4.96978 | 0.03365 | 4.88025 | 0.09716 | 0.38383  | 2.62068 | 0.44084 |
| 160         | 20.97426 | 28.71118 | 3.37856  | 1.28086 | 4.92155  | 4.01877 | 4.86398 | 1.39457 | 2.99872 | 1.88838  | 1.77235 | 0.53163 |
| 140         | 22.96585 | 22.95739 | 7.17869  | 1.37022 | 6.68291  | 3.64392 | 6.25411 | 0.32433 | 3.02427 | 2.53153  | 1.40323 | 0.63056 |
| 120         | 21.71902 | 16.66638 | 9.77983  | 2.35578 | 8.91772  | 2.66325 | 1.45618 | 1.69665 | 1.08819 | 8.14765  | 0.65306 | 2.4317  |
| 100         | 20.5708  | 8.53591  | 9.55238  | 4.53304 | 11.00805 | 1.0262  | 1.59435 | 2.22757 | 0.59533 | 7.41776  | 1.12853 | 1.33446 |
| 80          | 23.35337 | 8.40656  | 8.4031   | 4.29068 | 10.57117 | 2.20989 | 3.73725 | 2.25777 | 0.46267 | 7.63071  | 1.00574 | 0.90185 |
| 60          | 23.09291 | 14.03125 | 10.24722 | 1.88268 | 8.67356  | 1.62842 | 5.46689 | 1.57004 | 0.53508 | 7.86242  | 1.74226 | 2.42852 |
| 40          | 24.21625 | 16.63193 | 11.35538 | 0.95742 | 7.27051  | 1.88897 | 7.47433 | 0.55094 | 0.69324 | 3.88876  | 2.01117 | 2.59714 |
| 20          | 25.88871 | 18.39885 | 11.50543 | 0.68984 | 6.3175   | 2.03086 | 7.41927 | 0.29705 | 1.04786 | 2.46793  | 1.86852 | 2.41901 |
| 0           | 30.40518 | 16.29199 | 7.81824  | 1.07698 | 5.98472  | 2.10861 | 7.44944 | 0.55831 | 0.91451 | 2.77865  | 2.0945  | 2.00636 |
| $^{Nap}CNN$ | <S0 T1>  | <S0 T2>  | <S0 T3>  | <S1 T1> | <S1 T2>  | <S1 T3> | <S2 T1> | <S2 T2> | <S2 T3> | <S3 T1>  | <S3 T2> | <S3 T3> |
| 114.925     | 0.07262  | 37.20543 | 0.23629  | 4.08464 | 0.5765   | 4.96978 | 0.03365 | 4.88025 | 0.09716 | 0.38383  | 2.62068 | 0.44084 |
| 124.925     | 36.83882 | 0.15284  | 0.23878  | 0.49899 | 4.27413  | 5.14552 | 5.23446 | 5.1E-04 | 0.06891 | 2.28768  | 0.45232 | 0.44524 |
| 134.925     | 36.4901  | 0.23069  | 0.24175  | 0.46172 | 4.5012   | 5.31798 | 5.50469 | 0.03194 | 0.04693 | 2.16449  | 0.50446 | 0.44217 |
| 144.925     | 36.10599 | 0.30657  | 0.24178  | 0.45191 | 4.69549  | 5.47142 | 5.68235 | 0.06286 | 0.02683 | 0.29433  | 0.67403 | 0.68277 |
| 154.925     | 35.61546 | 0.37327  | 9.10039  | 0.47001 | 4.81316  | 0.5333  | 5.76907 | 0.09036 | 0.71976 | 0.35845  | 0.73651 | 0.04403 |
| 164.925     | 33.8479  | 0.61434  | 1.59502  | 0.8159  | 6.76944  | 7.913   | 6.40808 | 0.14188 | 0.29588 | 9.25661  | 0.75342 | 0.63163 |
| 174.925     | 32.99525 | 0.36497  | 0.719    | 0.40983 | 6.49419  | 7.8549  | 5.85659 | 0.08972 | 0.25724 | 10.22959 | 0.15192 | 0.32196 |
| 185.5688    | 32.61781 | 0.51879  | 1.07268  | 0.56131 | 6.41617  | 7.68868 | 5.86189 | 0.06106 | 0.2951  | 9.43972  | 0.50607 | 0.38794 |
| 195.5688    | 32.71702 | 0.83645  | 2.2959   | 0.87049 | 6.58577  | 7.29332 | 6.49856 | 0.08187 | 0.38369 | 7.94824  | 0.83693 | 0.58029 |
| 205.5688    | 32.40254 | 2.08104  | 6.07795  | 1.15448 | 7.06653  | 5.80551 | 8.17897 | 0.58989 | 0.41686 | 4.05137  | 1.23724 | 1.01471 |
| 215.5688    | 32.35567 | 4.64817  | 7.4981   | 1.05957 | 6.96522  | 4.24366 | 8.72259 | 1.15913 | 0.47432 | 0.4256   | 0.89425 | 1.47338 |
| 225.5688    | 30.19055 | 11.56339 | 9.79797  | 1.04454 | 6.65192  | 2.1029  | 7.92871 | 0.87261 | 0.45727 | 1.94888  | 0.8615  | 2.14579 |
| 235.5688    | 27.113   | 18.6357  | 10.61734 | 0.7346  | 6.04925  | 2.08904 | 7.3546  | 0.40443 | 1.04731 | 2.27751  | 1.80673 | 2.32099 |

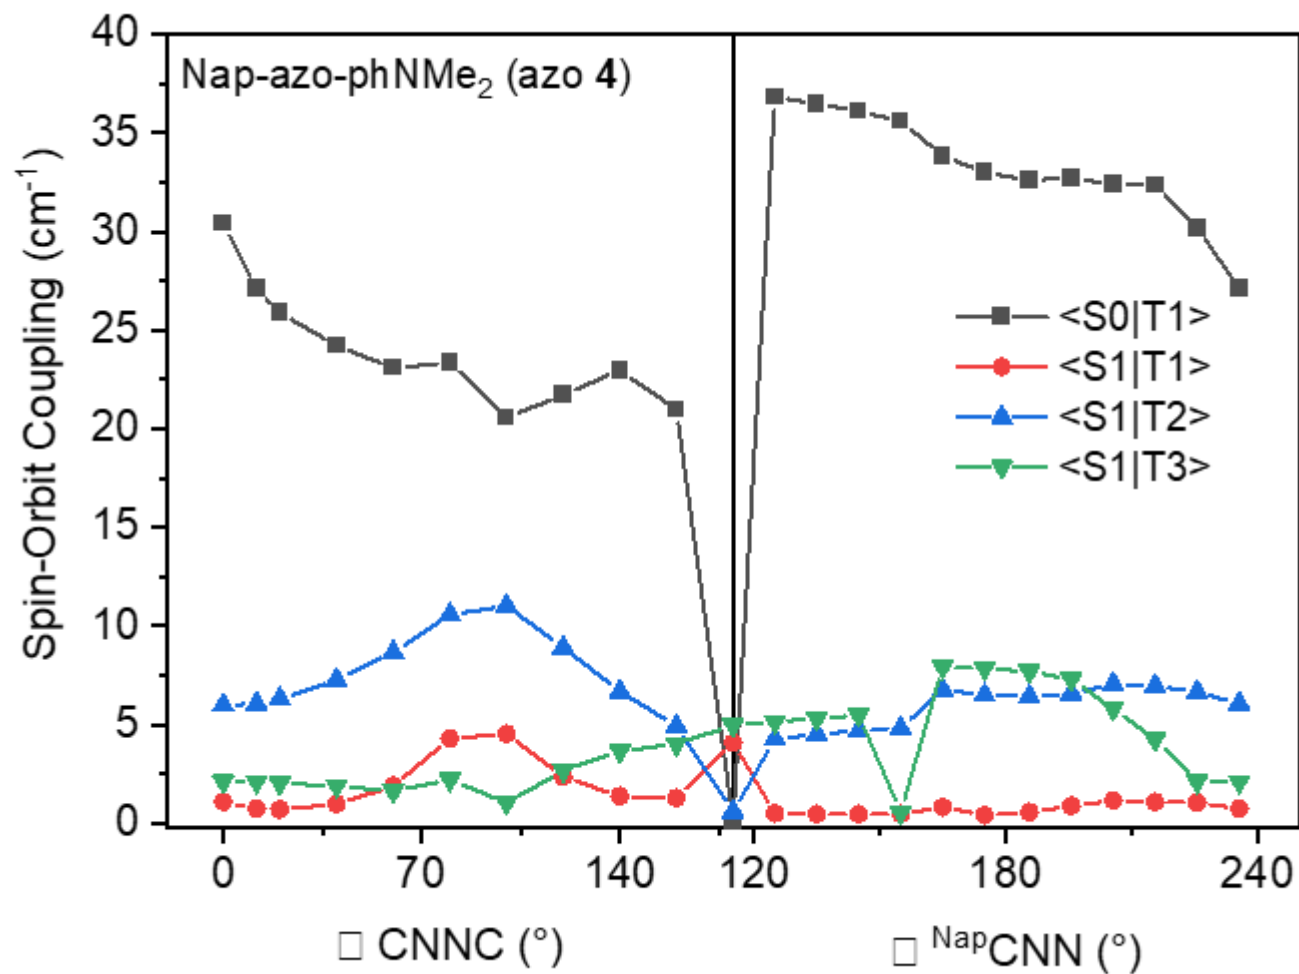

Figure S43. Schematic demonstration of spin-orbit coupling constants between  $S_0 - S_1$  and  $T_1 - T_3$  states of azo 4 at various CNNC dihedral angles and <sup>Nap</sup>CNN angles.



## References

- (1) Lakowicz, J. R. *Principles of Fluorescence Spectroscopy*; Springer US: Boston, MA, 1999.
- (2) Fujino, T.; Tahara, T. Picosecond Time-Resolved Raman Study of Trans -Azobenzene. *J. Phys. Chem. A* **2000**, *104* (18), 4203–4210.
- (3) Ditchfield, R.; Hehre, W. J.; Pople, J. A. Self-Consistent Molecular-Orbital Methods. IX. An Extended Gaussian-Type Basis for Molecular-Orbital Studies of Organic Molecules. *J. Chem. Phys.* **1971**, *54* (2), 724–728.
- (4) Francl, M. M.; Pietro, W. J.; Hehre, W. J.; Binkley, J. S.; Gordon, M. S.; DeFrees, D. J.; Pople, J. A. Self-consistent Molecular Orbital Methods. XXIII. A Polarization-type Basis Set for Second-row Elements. *J. Chem. Phys.* **1982**, *77* (7), 3654–3665.
- (5) Hehre, W. J.; Ditchfield, R.; Pople, J. A. Self—Consistent Molecular Orbital Methods. XII. Further Extensions of Gaussian—Type Basis Sets for Use in Molecular Orbital Studies of Organic Molecules. *J. Chem. Phys.* **1972**, *56* (5), 2257–2261.
- (6) Hariharan, P. C.; Pople, J. A. The Influence of Polarization Functions on Molecular Orbital Hydrogenation Energies. *Theor. Chim. Acta* **1973**, *28* (3), 213–222.
- (7) Becke, A. D. Density-functional Thermochemistry. III. The Role of Exact Exchange. *J. Chem. Phys.* **1993**, *98* (7), 5648–5652.
- (8) Lee, C.; Yang, W.; Parr, R. G. Development of the Colle-Salvetti Correlation-Energy Formula into a Functional of the Electron Density. *Phys. Rev. B* **1988**, *37* (2), 785–789.
- (9) Vosko, S. H.; Wilk, L.; Nusair, M. Accurate Spin-Dependent Electron Liquid Correlation Energies for Local Spin Density Calculations: A Critical Analysis. *Can. J. Phys.* **1980**, *58* (8), 1200–1211.
- (10) Stephens, P. J.; Devlin, F. J.; Chabalowski, C. F.; Frisch, M. J. Ab Initio Calculation of Vibrational Absorption and Circular Dichroism Spectra Using Density Functional Force Fields. *J. Phys. Chem.* **1994**, *98* (45), 11623–11627.
- (11) Weigend, F.; Häser, M.; Patzelt, H.; Ahlrichs, R. RI-MP2: Optimized Auxiliary Basis Sets and Demonstration of Efficiency. *Chem. Phys. Lett.* **1998**, *294* (1–3), 143–152.
- (12) R. Dennington, T. Keith, J. M. GaussView, Version. 6. Semichem Inc.: Shawnee Mission 2016.
- (13) Frisch, M. J.; Trucks, G. W.; Schlegel, H. B.; Scuseria, G. E.; Robb, M. A.; Cheeseman, J. R.; Scalmani, G.; Barone, V.; Petersson, G. A.; Nakatsuji, H.; Li, X.; Caricato, M.; Marenich, A. V; Bloino, J.; Janesko, B. G.; Gomperts, R.; Mennucci, B.; Hratchian, H. P.; Ortiz, J. V; Izmaylov, A. F.; Sonnenberg, J. L.; Williams-Young, D.; Ding, F.; Lipparini, F.; Egidi, F.; Goings, J.; Peng, B.; Petrone, A.; Henderson, T.; Ranasinghe, D.; Zakrzewski, V. G.; Gao, J.; Rega, N.; Zheng, G.; Liang, W.; Hada, M.; Ehara, M.; Toyota, K.; Fukuda, R.; Hasegawa, J.; Ishida, M.; Nakajima, T.; Honda, Y.; Kitao, O.; Nakai, H.; Vreven, T.; Throssell, K.; Montgomery Jr., J. A.; Peralta, J. E.; Ogliaro, F.; Bearpark, M. J.; Heyd, J. J.; Brothers, E. N.; Kudin, K. N.; Staroverov, V. N.; Keith, T. A.; Kobayashi, R.; Normand, J.; Raghavachari, K.; Rendell, A. P.; Burant, J. C.; Iyengar, S. S.; Tomasi, J.; Cossi, M.; Millam, J. M.; Klene, M.; Adamo, C.; Cammi, R.; Ochterski, J. W.; Martin, R. L.; Morokuma, K.; Farkas, O.; Foresman, J. B.; Fox, D. J. Gaussian 16. Gaussian, Inc.: Wallingford CT 2016.

- (14) Ogata, Y.; Takagi, Y. Kinetics of the Condensation of Anilines with Nitrosobenzenes to Form Azobenzenes. *J. Am. Chem. Soc.* **1958**, *80* (14), 3591–3595.
- (15) Li, G.-Q.; Gao, H.; Keene, C.; Devonas, M.; Ess, D. H.; Kürti, L. Organocatalytic Aryl–Aryl Bond Formation: An Atroposelective [3,3]-Rearrangement Approach to BINAM Derivatives. *J. Am. Chem. Soc.* **2013**, *135* (20), 7414–7417.
